# Supplementary material
Source: PubMed Central journal article supplement (PMC4156870)
Supplement: ja505783z_si_001.pdf [file ja505783z_si_001.pdf]

Supporting Information for:

**Protonation of Nickel-Iron Hydrogenase Models Proceeds after Isomerization at Nickel**

Mioy T. Huynh, David Schilter, Sharon Hammes-Schiffer, and Thomas B. Rauchfuss

Department of Chemistry, University of Illinois at Urbana-Champaign,  
Urbana, IL 61801, USA**List of Figures**

|                                                                                                                                          |    |
|------------------------------------------------------------------------------------------------------------------------------------------|----|
| Figure S1. Cyclic voltammogram of <b>1</b> .....                                                                                         | 4  |
| Figure S2. Positive ion ESI mass spectrum of $[2I]^+$ .....                                                                              | 5  |
| Figure S3. $^1H$ NMR spectrum of <b>2</b> .....                                                                                          | 5  |
| Figure S4. $^{31}P\{^1H\}$ NMR spectrum of <b>2</b> .....                                                                                | 6  |
| Figure S5. $^{31}P\{^1H\}$ NMR spectrum of <b>2</b> acquired at $-85\text{ }^\circ\text{C}$ .....                                        | 6  |
| Figure S6. FT-IR spectrum of <b>2</b> .....                                                                                              | 7  |
| Figure S7. Positive ion ESI mass spectrum of <b>2</b> revealing decarbonylation. ....                                                    | 7  |
| Figure S8. FT-IR spectrum of $[2]BF_4$ .....                                                                                             | 7  |
| Figure S9. Positive ion ESI mass spectrum of $[2]BF_4$ .....                                                                             | 8  |
| Figure S10. $^1H$ NMR spectrum of $[2H]BF_4$ .....                                                                                       | 8  |
| Figure S11. $^{31}P\{^1H\}$ NMR spectrum of $[2H]BF_4$ .....                                                                             | 9  |
| Figure S12. FT-IR spectrum of $[2H]BF_4$ .....                                                                                           | 9  |
| Figure S13. Positive ion ESI mass spectrum of $[2H]BF_4$ .....                                                                           | 10 |
| Figure S14. Cyclic voltammogram of $[2H]BF_4$ .....                                                                                      | 10 |
| Figure S15. Positive ion ESI mass spectrum of residue dissolved in $CH_3CN$ after $[2H]BF_4$<br>was left for 2 d in $CH_2Cl_2/air$ ..... | 11 |
| Figure S16. $^2H$ NMR spectrum of $[2D]BF_4$ .....                                                                                       | 11 |
| Figure S17. $^{31}P\{^1H\}$ NMR spectrum of $[2D]BF_4$ .....                                                                             | 12 |
| Figure S18. FT-IR spectrum of $[2D]BF_4$ .....                                                                                           | 12 |
| Figure S19. Positive ion ESI mass spectrum of $[2D]BF_4$ .....                                                                           | 13 |
| Figure S20. FT-IR spectrum of $[2']BF_4$ .....                                                                                           | 13 |
| Figure S21. Positive ion ESI mass spectrum of $[2']BF_4$ .....                                                                           | 13 |
| Figure S22. Positive ion ESI mass spectrum of $[2']BF_4$ after 2 d in $CH_2Cl_2$ .....                                                   | 14 |
| Figure S23. X-band EPR spectra of $[2]BF_4$ and $[2']BF_4$ .....                                                                         | 14 |
| Figure S24. Positive ion ESI mass spectrum of $[3I]^+$ .....                                                                             | 15 |
| Figure S25. FT-IR spectrum ( $\nu_{CO}$ region, $CH_2Cl_2$ ) of <b>3</b> .....                                                           | 15 |
| Figure S26. $^1H$ NMR spectrum ( $CD_2Cl_2$ , 500 MHz) of <b>3</b> .....                                                                 | 16 |
| Figure S27. $^{31}P\{^1H\}$ NMR spectrum of <b>3</b> .....                                                                               | 17 |
| Figure S28. $^{31}P\{^1H\}$ NMR spectrum of <b>3</b> acquired at $-85\text{ }^\circ\text{C}$ .....                                       | 17 |
| Figure S29. Cyclic voltammogram of <b>3</b> .....                                                                                        | 18 |
| Figure S31. X-band EPR spectrum of $[3]BF_4$ .....                                                                                       | 19 |
| Figure S32. X-band EPR spectrum of $[3]BF_4$ .....                                                                                       | 19 |
| Figure S33. Positive ion ESI mass spectrum of $[3]BF_4$ .....                                                                            | 20 |
| Figure S34. FT-IR spectrum of $[3H]BF_4$ .....                                                                                           | 20 |
| Figure S35. $^1H$ NMR spectrum of $[3H]BF_4$ .....                                                                                       | 21 |

|                                                                                                                                                                                                        |    |
|--------------------------------------------------------------------------------------------------------------------------------------------------------------------------------------------------------|----|
| Figure S36. $^{31}\text{P}\{^1\text{H}\}$ NMR spectrum of $[\mathbf{3H}]\text{BF}_4$ .....                                                                                                             | 21 |
| Figure S37. Positive ion ESI mass spectrum of $[\mathbf{3H}]\text{BF}_4$ .....                                                                                                                         | 22 |
| Figure S38. FT-IR spectrum of $[\mathbf{3}']\text{BF}_4$ .....                                                                                                                                         | 22 |
| Figure S39. Positive ion ESI mass spectrum of $[\mathbf{3}']\text{BF}_4$ .....                                                                                                                         | 23 |
| Figure S40. X-band EPR spectrum ( $\text{CH}_2\text{Cl}_2/\text{PhMe}$ , 120 K) of $[\mathbf{3}']\text{BF}_4$ .....                                                                                    | 23 |
| Figure S41. X-band EPR spectrum ( $\text{CH}_2\text{Cl}_2/\text{PhMe}$ , 290 K) of $[\mathbf{3}']\text{BF}_4$ .....                                                                                    | 24 |
| Figure S42. Cyclic voltammogram of $[\mathbf{3}']\text{BF}_4$ .....                                                                                                                                    | 24 |
| Figure S43. UV-vis spectra of <b>1</b> , <b>2</b> and <b>3</b> .....                                                                                                                                   | 25 |
| Figure S44. $^1\text{H}$ NMR spectrum of $(\text{pdt})\text{Ni}(\text{S,S-chiraphos})$ .....                                                                                                           | 25 |
| Figure S45. $^{31}\text{P}\{^1\text{H}\}$ NMR spectrum of $(\text{pdt})\text{Ni}(\text{S,S-chiraphos})$ .....                                                                                          | 26 |
| Figure S46. Positive ion ESI mass spectrum of $(\text{pdt})\text{Ni}(\text{S,S-chiraphos})$ .....                                                                                                      | 26 |
| Figure S47. $^1\text{H}$ NMR spectrum of $(\text{CO})_3\text{Fe}(\text{pdt})\text{Ni}(\text{S,S-chiraphos})$ .....                                                                                     | 27 |
| Figure S48. $^{31}\text{P}\{^1\text{H}\}$ NMR spectrum of $(\text{CO})_3\text{Fe}(\text{pdt})\text{Ni}(\text{S,S-chiraphos})$ .....                                                                    | 27 |
| Figure S49. VT $^{31}\text{P}\{^1\text{H}\}$ NMR of $(\text{CO})_3\text{Fe}(\text{pdt})\text{Ni}(\text{S,S-chiraphos})$ .....                                                                          | 28 |
| Figure S50. FT-IR spectrum of $(\text{CO})_3\text{Fe}(\text{pdt})\text{Ni}(\text{S,S-chiraphos})$ .....                                                                                                | 28 |
| Figure S51. Positive ion ESI mass spectrum of $(\text{CO})_3\text{Fe}(\text{pdt})\text{Ni}(\text{S,S-chiraphos})$ .....                                                                                | 29 |
| Figure S52. $^1\text{H}$ NMR spectrum of $[(\text{CO})_3\text{FeH}(\text{pdt})\text{Ni}(\text{S,S-chiraphos})]\text{BF}_4$ .....                                                                       | 29 |
| Figure S53. $^{31}\text{P}\{^1\text{H}\}$ NMR spectrum of $[(\text{CO})_3\text{FeH}(\text{pdt})\text{Ni}(\text{S,S-chiraphos})]\text{BF}_4$ acquired at room temperature and $-70^\circ\text{C}$ ..... | 30 |
| Figure S54. FT-IR of $[(\text{CO})_3\text{FeH}(\text{pdt})\text{Ni}(\text{S,S-chiraphos})]\text{BF}_4$ .....                                                                                           | 30 |
| Figure S55. Positive ion ESI mass spectrum of $[(\text{CO})_3\text{FeH}(\text{pdt})\text{Ni}(\text{S,S-chiraphos})]\text{BF}_4$ .....                                                                  | 31 |
| Figure S56. NBO depiction for (a) the Ni–Fe bond in <b>1</b> and (b) the Pd–Fe bond in <b>2</b> .....                                                                                                  | 34 |
| Figure S57. Isomeric and tautomeric forms of $[\mathbf{1H}]^+$ and their corresponding free energies relative to the square-planar $\mu$ -hydrido form.....                                            | 35 |

### List of Tables

|                                                                                                                                                                                                                                                                      |    |
|----------------------------------------------------------------------------------------------------------------------------------------------------------------------------------------------------------------------------------------------------------------------|----|
| Table S1. EPR Simulation Parameters for $[\mathbf{2}]\text{BF}_4$ (Two Conformers) and $[\mathbf{2}']\text{BF}_4$ .....                                                                                                                                              | 14 |
| Table S2. Reversibility of the $[\mathbf{3}']^{2+/+}$ Couple is Unaffected by Scan Rate. ....                                                                                                                                                                        | 25 |
| Table S3. Selected Bond Lengths (Å) and Angles ( $^\circ$ ) for <b>1-3</b> , Determined Experimentally (X-ray Crystallography) and Computationally (DFT).....                                                                                                        | 32 |
| Table S4. Selected Bond Lengths (Å) and Angles ( $^\circ$ ) for $[\mathbf{1-3H}]^+$ , Determined Experimentally (X-ray Crystallography) and Computationally (DFT).....                                                                                               | 32 |
| Table S5. Selected Bond Lengths (Å) and Angles ( $^\circ$ ) for Isomers of FeM Complexes <b>1-3</b> , with Tetrahedral or Square Planar M.....                                                                                                                       | 32 |
| Table S6. Calculated Reaction Free Energies ( $\Delta G^\circ$ ) for Rotation from Tetrahedral to Square Planar Geometry at the Ni(dppe) Site in $(\text{CO})_3\text{Fe}(\text{pdt})\text{Ni}(\text{dppe})$ using Different Functionals.....                         | 33 |
| Table S7. Calculated Reaction Free Energies ( $\Delta G^\circ$ ) for Rotation from Tetrahedral to Square Planar Geometry at the Ni(dppe) Site in $(\text{CO})_3\text{Fe}(\text{pdt})\text{Ni}(\text{dppe})$ using Different Basis Sets with the BP86 Functional..... | 33 |
| Table S8. Calculated Reaction Free Energies ( $\Delta G^\circ$ ) for Rotation from Tetrahedral to Square Planar Geometry at the M(dppe) Site in <b>2</b> and <b>3</b> using Different Functionals.....                                                               | 34 |
| Table S9. Calculated Free Energy Barriers ( $\Delta G^\ddagger$ ) and Imaginary Frequencies of Transition States for Tetrahedral to Square Planar Rotation at the Ni(dppe) Site in $(\text{CO})_3\text{Fe}(\text{pdt})\text{Ni}(\text{dppe})$ .....                  | 35 |

|                                                                                                                                                                                                                   |    |
|-------------------------------------------------------------------------------------------------------------------------------------------------------------------------------------------------------------------|----|
| Table S10. Cartesian Coordinates of the Optimized Structure of $(\text{OC})_3\text{Fe}(\text{pdt})\text{Ni}(\text{dppe})$ in Tetrahedral Geometry ( <b>1</b> , $-3243.63774874 E_h$ ).....                        | 36 |
| Table S11. Cartesian Coordinates of the Optimized Structure of $(\text{OC})_3\text{Fe}(\text{pdt})\text{Ni}(\text{dppe})$ in Square Planar Geometry ( <b>1</b> , $-3243.62931132 E_h$ ).....                      | 38 |
| Table S12. Cartesian Coordinates of the Optimized Structure of $(\text{OC})_3\text{Fe}(\text{pdt})\text{Ni}(\text{dppe})$ Transition State ( <b>1</b> , $-3243.62855419 E_h$ ).....                               | 40 |
| Table S13. Cartesian Coordinates of the Optimized Structure of $[(\text{OC})_3\text{Fe}(\text{pdt})\text{Ni}(\text{dppe})]^+$ ( <b>[1]</b> <sup>+</sup> , $-3243.44266981 E_h$ ).....                             | 42 |
| Table S14. Cartesian Coordinates of the Optimized Structure of $[(\text{OC})_3\text{Fe}(\text{pdt})\text{Ni}(\text{dppe})]^{2+}$ ( <b>[1]</b> <sup>2+</sup> , $-3243.09204890 E_h$ ).....                         | 44 |
| Table S15. Cartesian Coordinates of the Optimized Structure of $[(\text{OC})_3\text{FeH}(\text{pdt})\text{Ni}(\text{dppe})]^+$ in Square Planar Geometry ( <b>[1H]</b> <sup>+</sup> , $-3244.06263786 E_h$ )..... | 46 |
| Table S16. Cartesian Coordinates of the Optimized Structure of $[(\text{OC})_3\text{FeH}(\text{pdt})\text{Ni}(\text{dppe})]^+$ in Tetrahedral Geometry ( <b>[1H]</b> <sup>+</sup> , $-3244.04345183 E_h$ ).....   | 48 |
| Table S17. Cartesian Coordinates of the Optimized Structure of $(\text{OC})_3\text{Fe}(\text{pdt})\text{Pd}(\text{dppe})$ in Tetrahedral Geometry ( <b>2</b> , $-3200.63063206 E_h$ ).....                        | 50 |
| Table S18. Cartesian Coordinates of the Optimized Structure of $(\text{OC})_3\text{Fe}(\text{pdt})\text{Pd}(\text{dppe})$ in Square Planar Geometry ( <b>2</b> , $-3200.61739333 E_h$ ).....                      | 52 |
| Table S19. Cartesian Coordinates of the Optimized Structure of $(\text{OC})_3\text{Fe}(\text{pdt})\text{Pd}(\text{dppe})$ Transition State ( <b>2</b> , $-3200.61680041 E_h$ ).....                               | 54 |
| Table S20. Cartesian Coordinates of the Optimized Structure of $[(\text{OC})_3\text{Fe}(\text{pdt})\text{Pd}(\text{dppe})]^+$ ( <b>[2]</b> <sup>+</sup> , $-3200.43767846 E_h$ ).....                             | 56 |
| Table S21. Cartesian Coordinates of the Optimized Structure of $[(\text{OC})_3\text{Fe}(\text{pdt})\text{Pd}(\text{dppe})]^{2+}$ ( <b>[2]</b> <sup>2+</sup> , $-3200.09088385 E_h$ ).....                         | 58 |
| Table S22. Cartesian Coordinates of the Optimized Structure of $[(\text{OC})_3\text{FeH}(\text{pdt})\text{Pd}(\text{dppe})]^+$ ( <b>[2H]</b> <sup>+</sup> , $-3201.05077293 E_h$ ).....                           | 60 |
| Table S23. Cartesian Coordinates of the Optimized Structure of $(\text{OC})_3\text{Fe}(\text{pdt})\text{Pt}(\text{dppe})$ in Tetrahedral Geometry ( <b>3</b> , $-3192.11918792 E_h$ ).....                        | 62 |
| Table S24. Cartesian Coordinates of the Optimized Structure of $(\text{OC})_3\text{Fe}(\text{pdt})\text{Pt}(\text{dppe})$ in Square Planar Geometry ( <b>3</b> , $-3192.15744694 E_h$ ).....                      | 64 |
| Table S25. Cartesian Coordinates of the Optimized Structure of $[(\text{OC})_3\text{Fe}(\text{pdt})\text{Pt}(\text{dppe})]^+$ ( <b>[3]</b> <sup>+</sup> , $-3191.97670157 E_h$ ).....                             | 66 |
| Table S26. Cartesian Coordinates of the Optimized Structure of $[(\text{OC})_3\text{Fe}(\text{pdt})\text{Pt}(\text{dppe})]^{2+}$ ( <b>[3]</b> <sup>2+</sup> , $-3191.58941051 E_h$ ).....                         | 68 |
| Table S27. Cartesian Coordinates of the Optimized Structure of $[(\text{OC})_3\text{FeH}(\text{pdt})\text{Pt}(\text{dppe})]^+$ ( <b>[3H]</b> <sup>+</sup> , $-3192.54469861 E_h$ ).....                           | 70 |

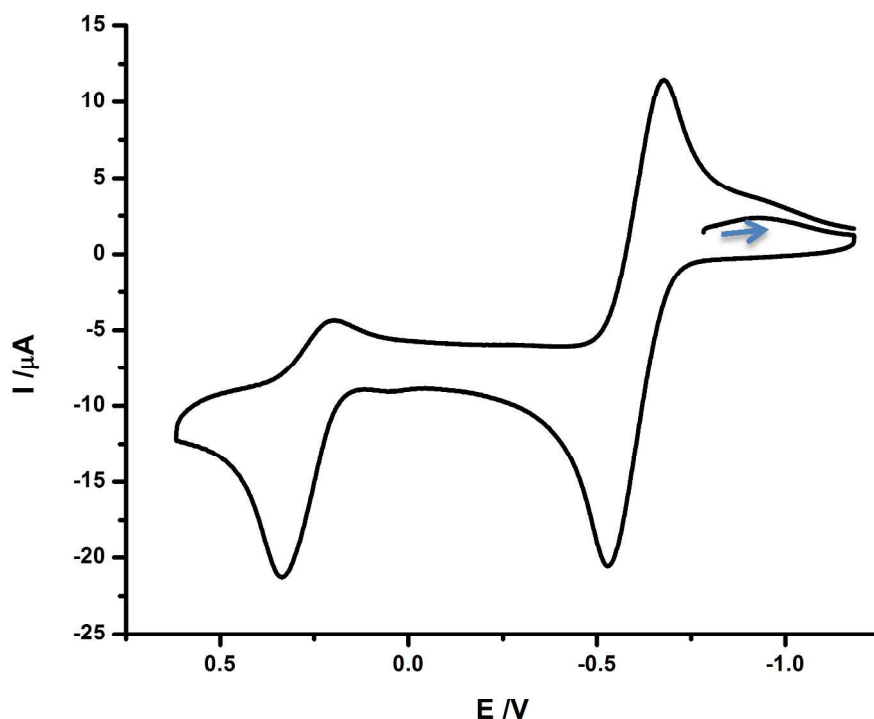

**Figure S1.** Cyclic voltammogram of **1**. Conditions: see Experimental.

The barrier to Ni(dppe) rotation in **1** (tetrahedral  $\leftrightarrow$  square planar) was determined according to the Gutowsky-Holm relation, using previously reported data:

$$\begin{aligned}
 T_C &= -30^\circ\text{C} = 243 \text{ K} \\
 \Delta\nu &= (82 \text{ ppm} - 46 \text{ ppm})(202 \text{ MHz}) = 7272 \text{ s}^{-1} \\
 k_C &= \pi \sqrt{\Delta\nu} / 2^{0.5} \\
 &= 16200 \text{ s}^{-1}
 \end{aligned}$$

$$\begin{aligned}
 \Delta G^\ddagger &= 4.58(T_C) \{10.32 + \log_{10}(T_C/k_C)\} \text{ cal/mol} \\
 &= 4.58(243)(10.32 + \log_{10}(243/16200)) \text{ cal/mol} \\
 &\approx 9.5 \text{ kcal/mol}
 \end{aligned}$$

Since the Pd(dppe) fragment in **2** was found to be dynamic even at  $-85^\circ\text{C}$ , we could estimate only an upper bound for  $\Delta G^\ddagger$ . Since we could not determine  $\Delta\nu$  (difference in resonant frequency for the two decoalesced  $^{31}\text{P}$  signals) for **2**, we employed the value  $7272 \text{ s}^{-1}$  found for **1**.

$$\begin{aligned}
 T_C &< -85^\circ\text{C} = 188 \text{ K} \\
 \Delta G^\ddagger &< 4.58(188)(10.32 + \log_{10}(188/16200)) \text{ cal/mol} \\
 &< 7.2 \text{ kcal/mol}
 \end{aligned}$$

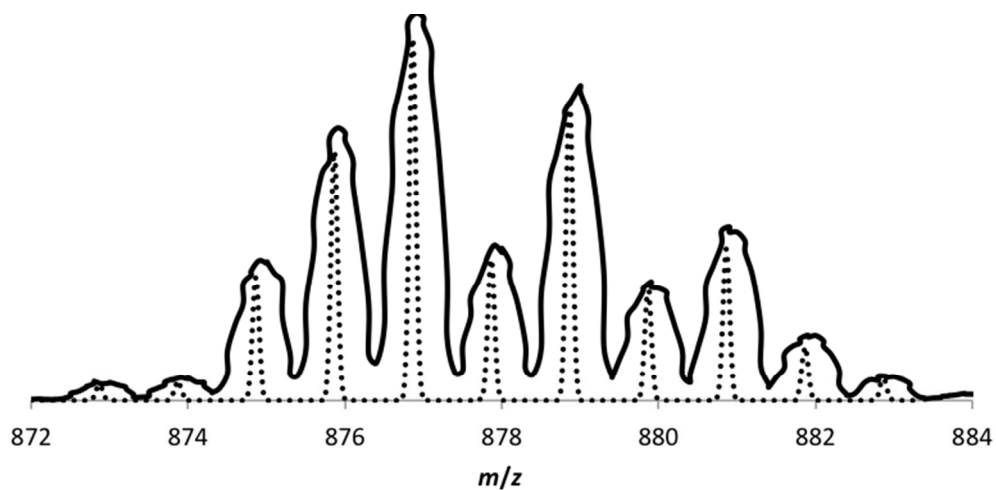

**Figure S2.** Positive ion ESI mass spectrum of  $[2I]^+$ . The simulated spectrum is presented as a dotted trace.

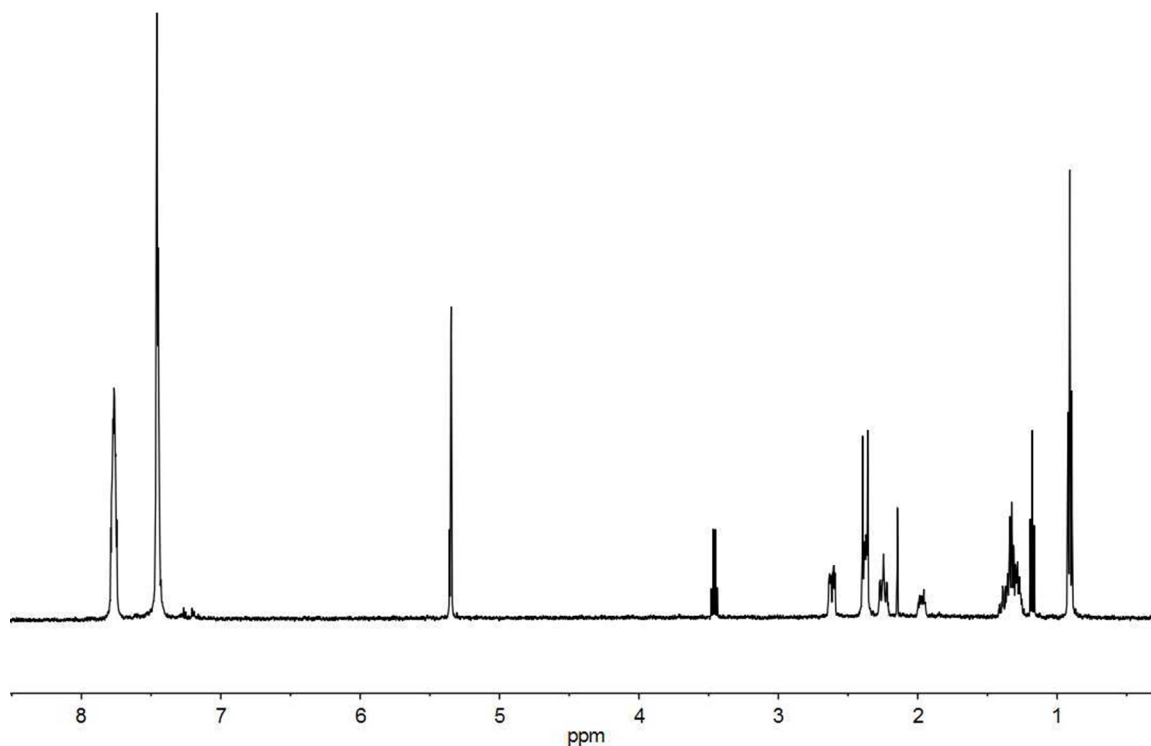

**Figure S3.**  $^1\text{H}$  NMR spectrum ( $\text{CD}_2\text{Cl}_2$ , 500 MHz) of **2**. Resonances at 3.43 ( $\text{Et}_2\text{O}$ ), 1.31 (pentane), 1.12 ( $\text{Et}_2\text{O}$ ) and 0.89 ppm (pentane) are from solvent impurities.

S6

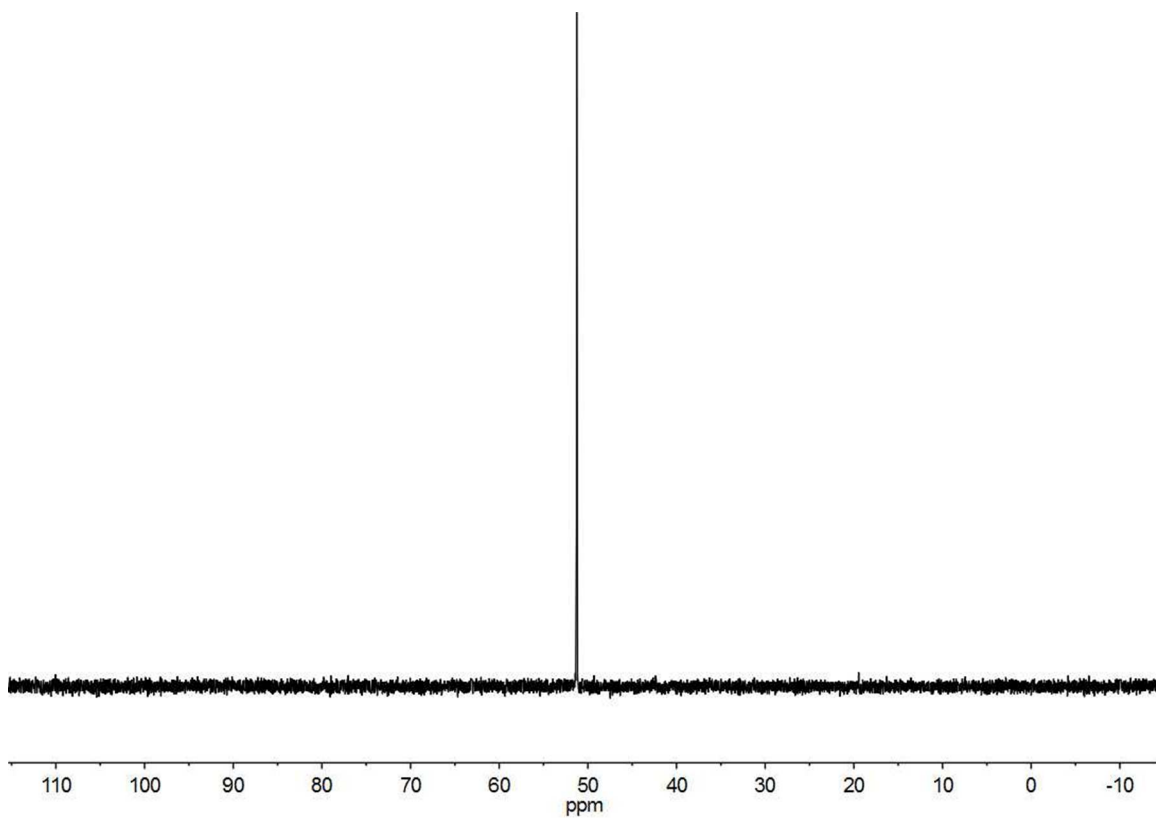

**Figure S4.**  $^{31}\text{P}\{^1\text{H}\}$  NMR spectrum ( $\text{CD}_2\text{Cl}_2$ , 202 MHz) of **2** acquired at room temperature.

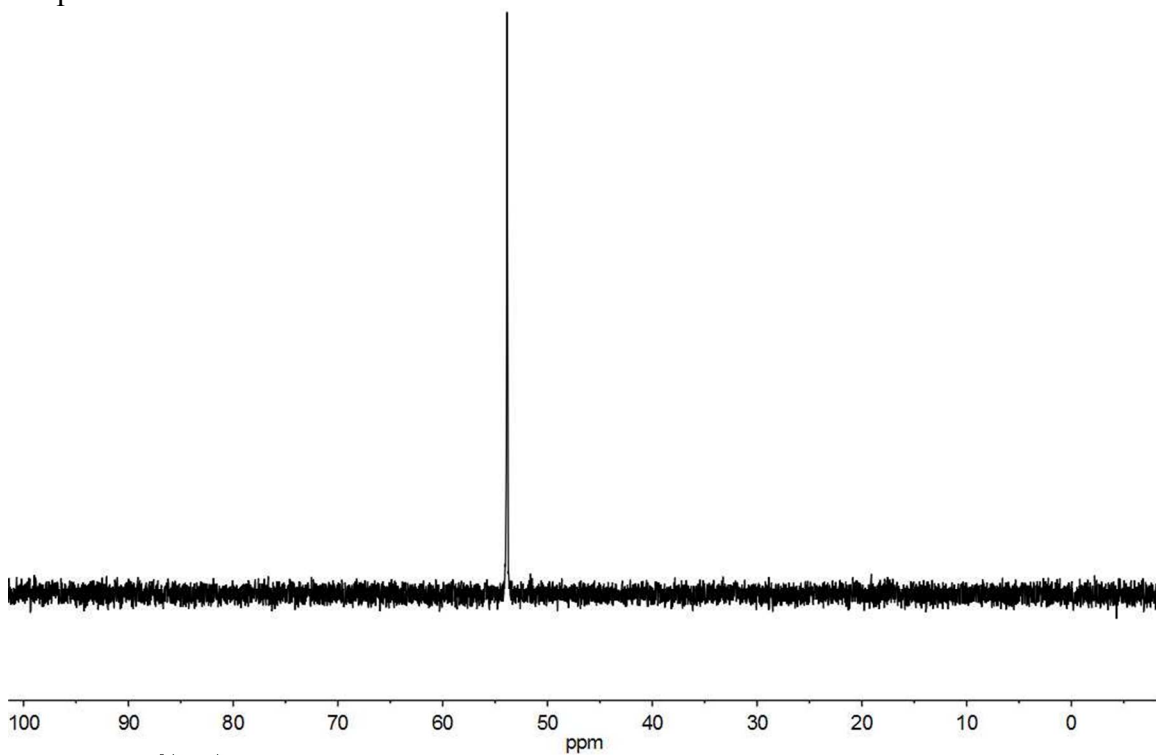

**Figure S5.**  $^{31}\text{P}\{^1\text{H}\}$  NMR spectrum ( $\text{CD}_2\text{Cl}_2$ , 202 MHz) of **2** acquired at  $-85\text{ }^\circ\text{C}$ .

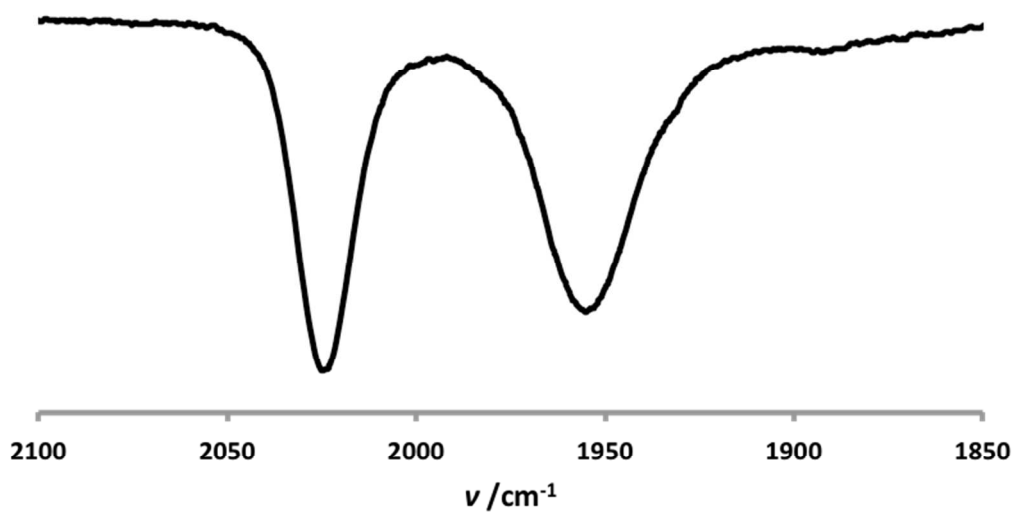

**Figure S6.** FT-IR spectrum ( $\nu_{\text{CO}}$  region,  $\text{CH}_2\text{Cl}_2$ ) of **2**.

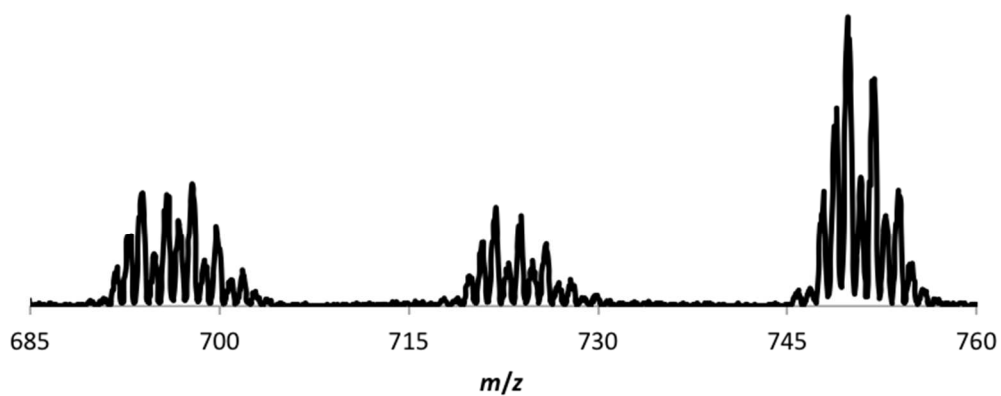

**Figure S7.** Positive ion ESI mass spectrum of **2** revealing decarboxylation.

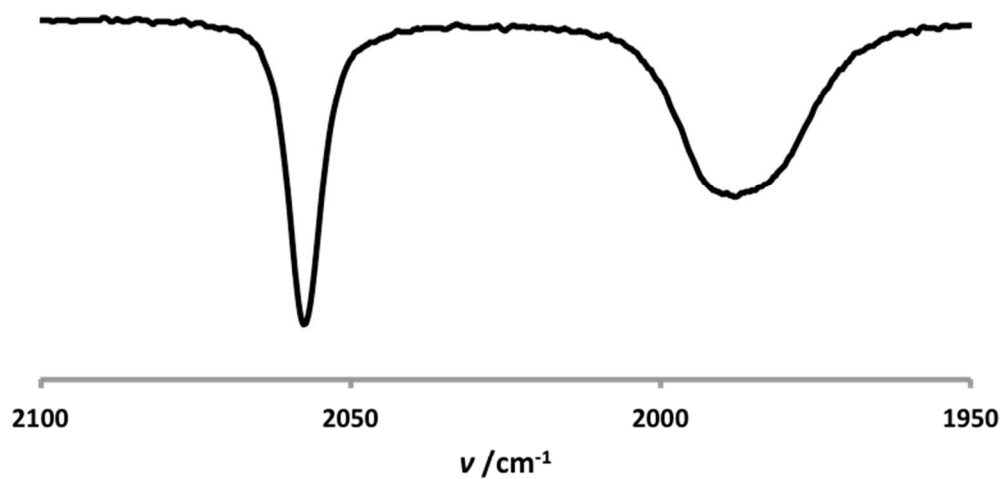

**Figure S8.** FT-IR spectrum ( $\nu_{\text{CO}}$  region,  $\text{CH}_2\text{Cl}_2$ ) of  $[\mathbf{2}]\text{BF}_4$ .

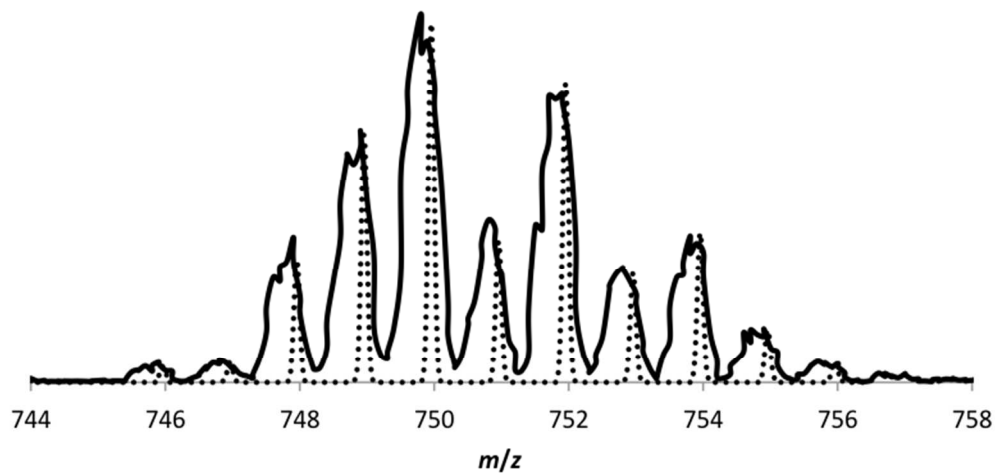

**Figure S9.** Positive ion ESI mass spectrum of  $[2]BF_4$ . The simulated spectrum is presented as a dotted trace.

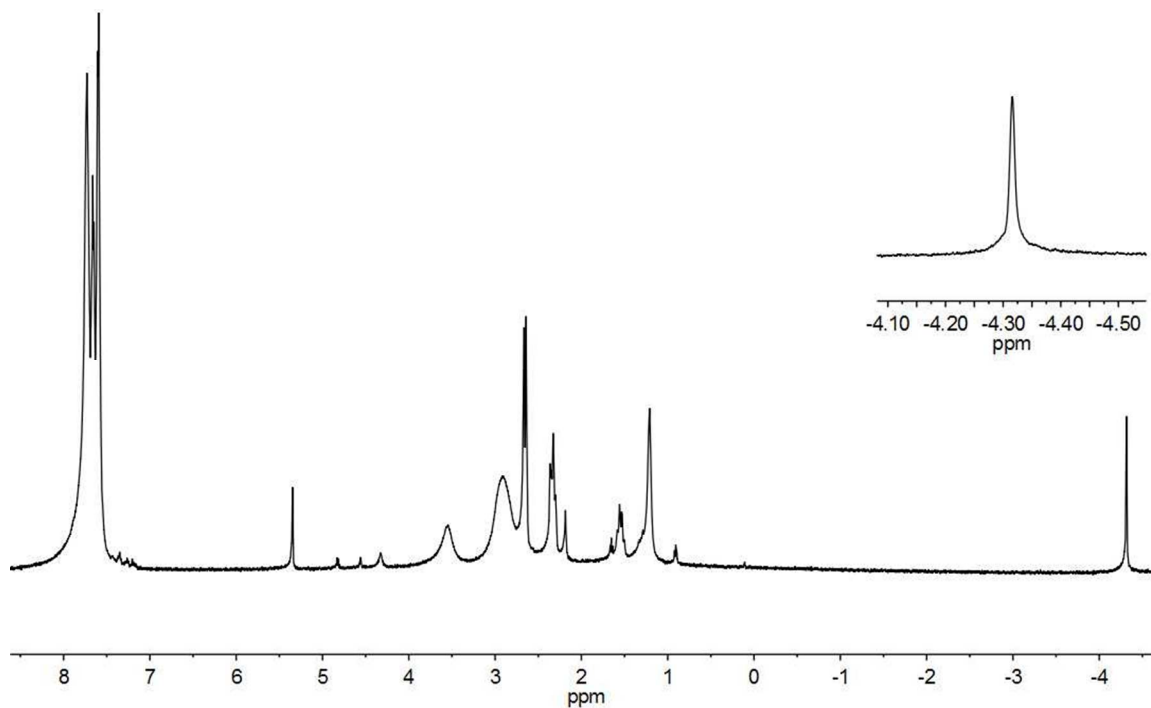

**Figure S10.**  $^1H$  NMR spectrum ( $CD_2Cl_2$ , 500 MHz) of  $[2H]BF_4$ . Resonances at 3.52 ( $Et_2O$ ), 1.31 (pentane), 1.18 ( $Et_2O$ ) and 0.89 ppm (pentane) are from solvent impurities.



S9

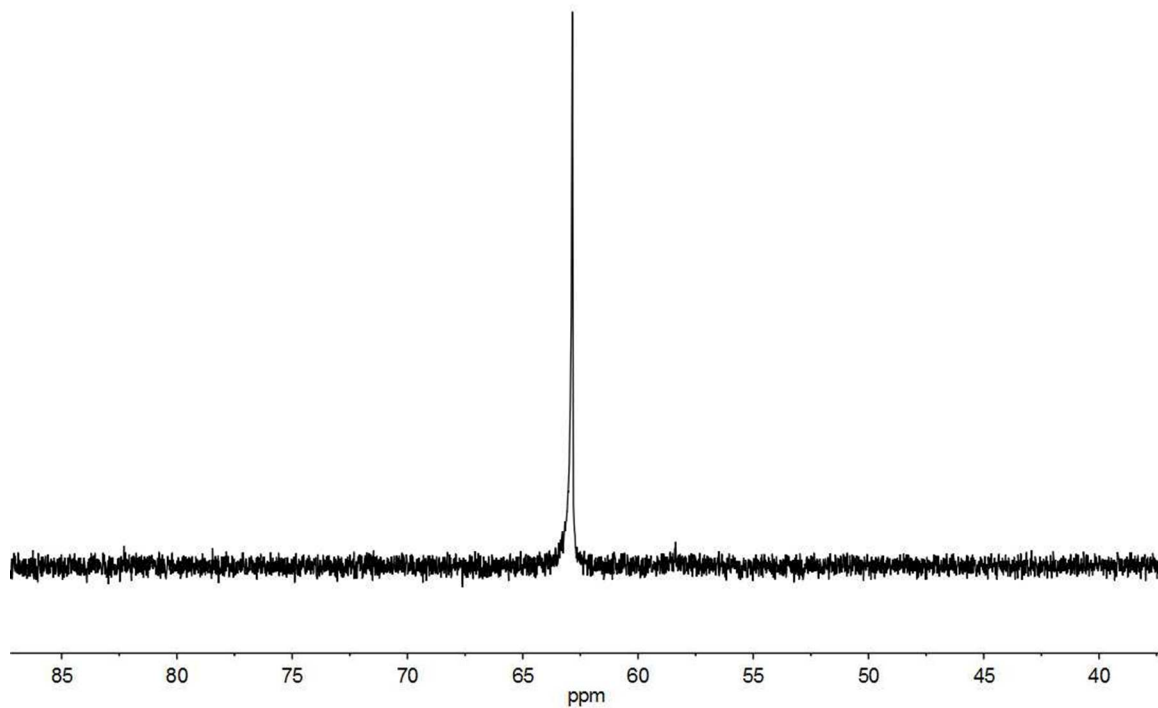

**Figure S11.**  $^{31}\text{P}\{^1\text{H}\}$  NMR spectrum ( $\text{CD}_2\text{Cl}_2$ , 202 MHz) of  $[\text{2H}]\text{BF}_4$ .

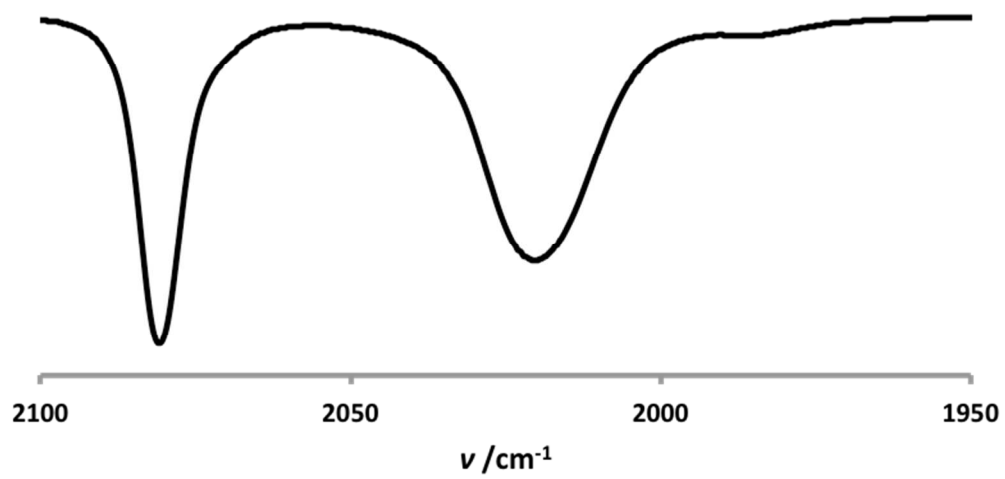

**Figure S12.** FT-IR spectrum ( $\nu_{\text{CO}}$  region,  $\text{CH}_2\text{Cl}_2$ ) of  $[\text{2H}]\text{BF}_4$ .

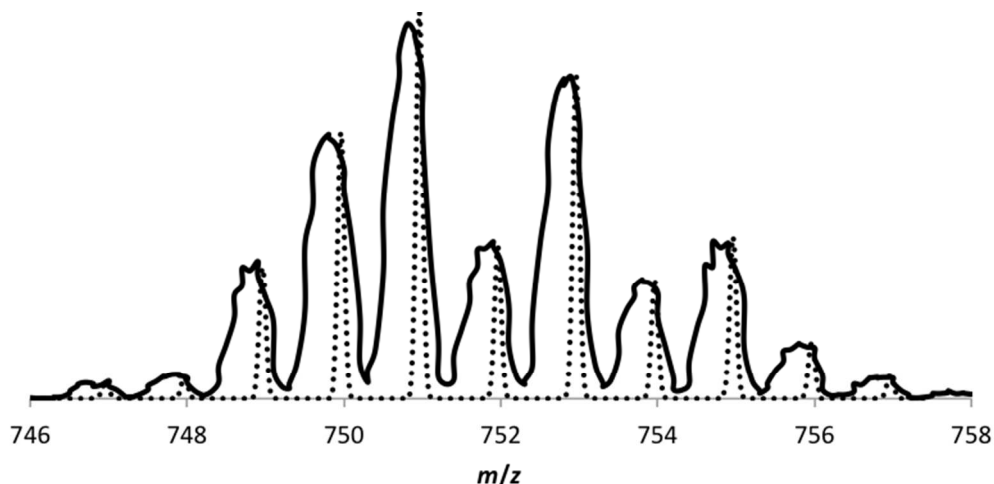

**Figure S13.** Positive ion ESI mass spectrum of  $[2H]BF_4$ . The simulated spectrum is presented as a dotted trace. In solution, moisture/air induces degradation of  $[2H]BF_4$  to **2** and  $[(dppe)Pd(pdt)Pd(dppe)](BF_4)_2$  ( $m/z$  1203.7  $[M - BF_4^-]^+$ , 558.8  $[M - 2BF_4^-]^{2+}$ ; see **Figure S15**) and  $[(dppe)Pd(pdt)Pd(pdt)Pd(dppe)](BF_4)_2$  ( $m/z$  663.8.7  $[M - 2BF_4^-]^{2+}$ ).

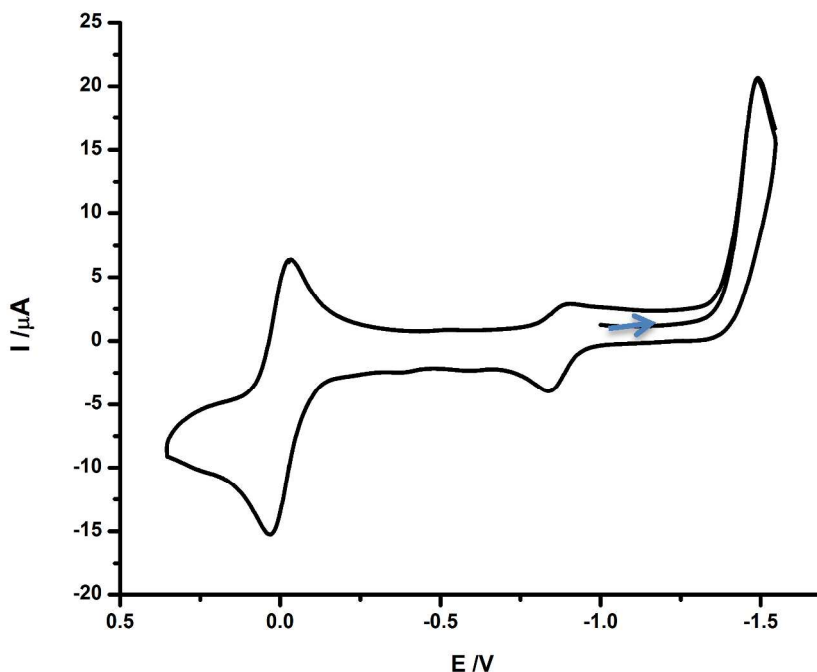

**Figure S14.** Cyclic voltammogram of  $[2H]BF_4$ . The wave at 0 V is due to internal  $Fc^{0/+}$ . The electrochemistry of  $[2H]BF_4$  is complicated, an irreversible wave at  $-1.49$  V being ascribed to a metal-centered. This event is followed by decomposition of the  $1e^-$  reduced species  $[2H]$  (perhaps by interaction with  $[2H]^+$ ) to liberate  $H_2$  and **2**. The presence of the latter is evidenced by the appearance of a reversible wave at  $-0.87$  V (assigned to the  $[2]^{0/+}$  couple) on the return scan. *Conditions:* see Experimental.

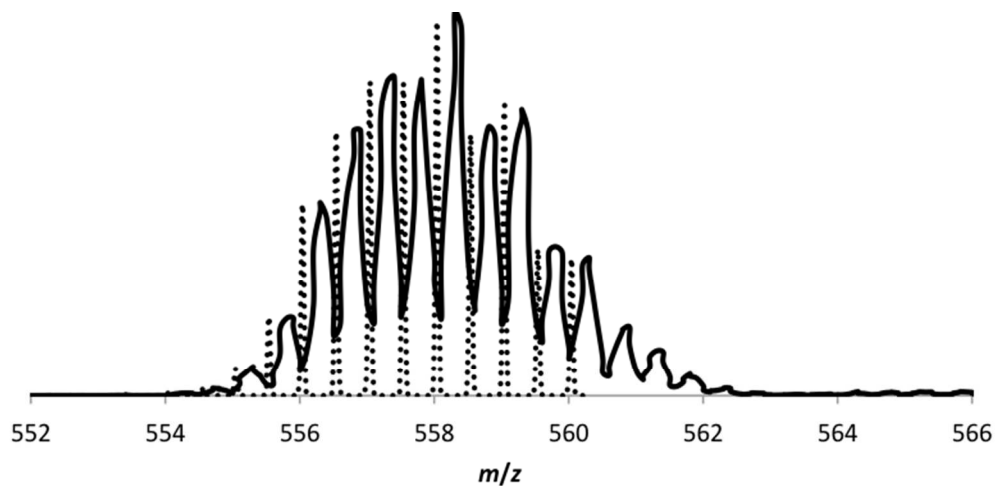

**Figure S15.** Positive ion ESI mass spectrum of residue dissolved in  $\text{CH}_3\text{CN}$  after  $[\text{2H}]\text{BF}_4$  was left for 2 d in  $\text{CH}_2\text{Cl}_2/\text{air}$ .

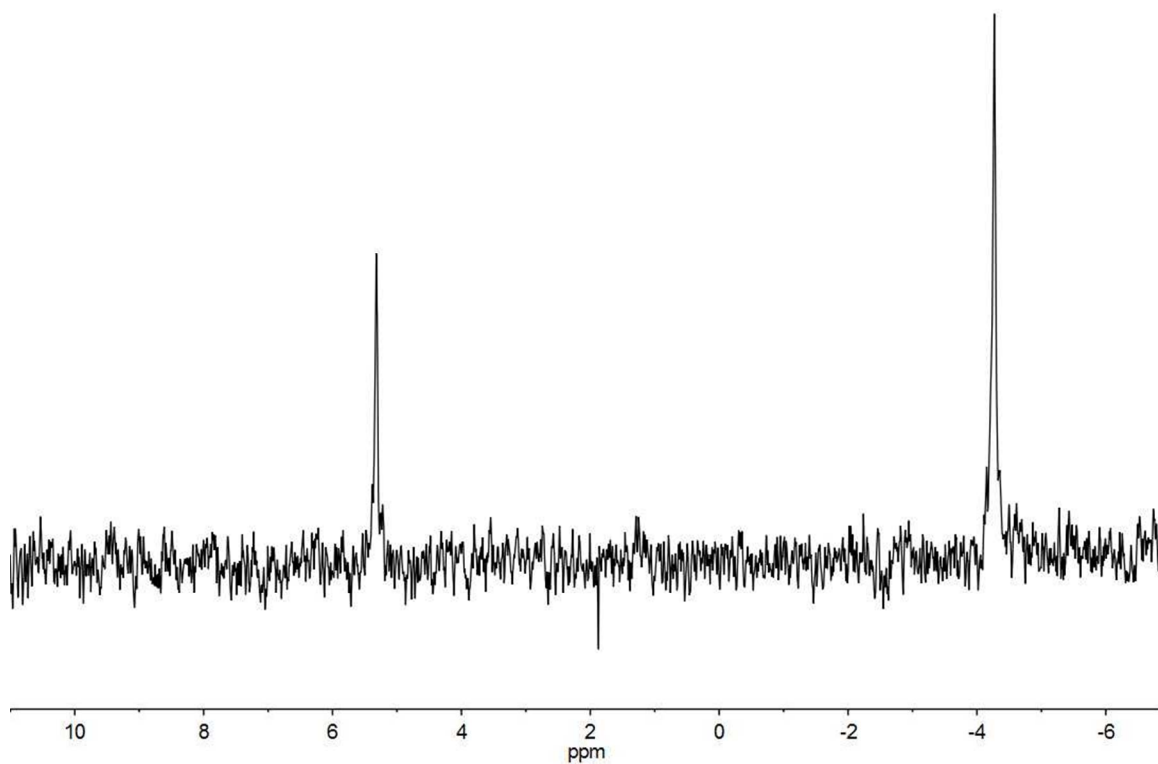

**Figure S16.**  $^2\text{H}$  NMR spectrum ( $\text{CH}_2\text{Cl}_2$ , 77 MHz) of  $[\text{2D}]\text{BF}_4$ . The resonance at 5.3 ppm is from residual  $\text{CHDCl}_2$ .

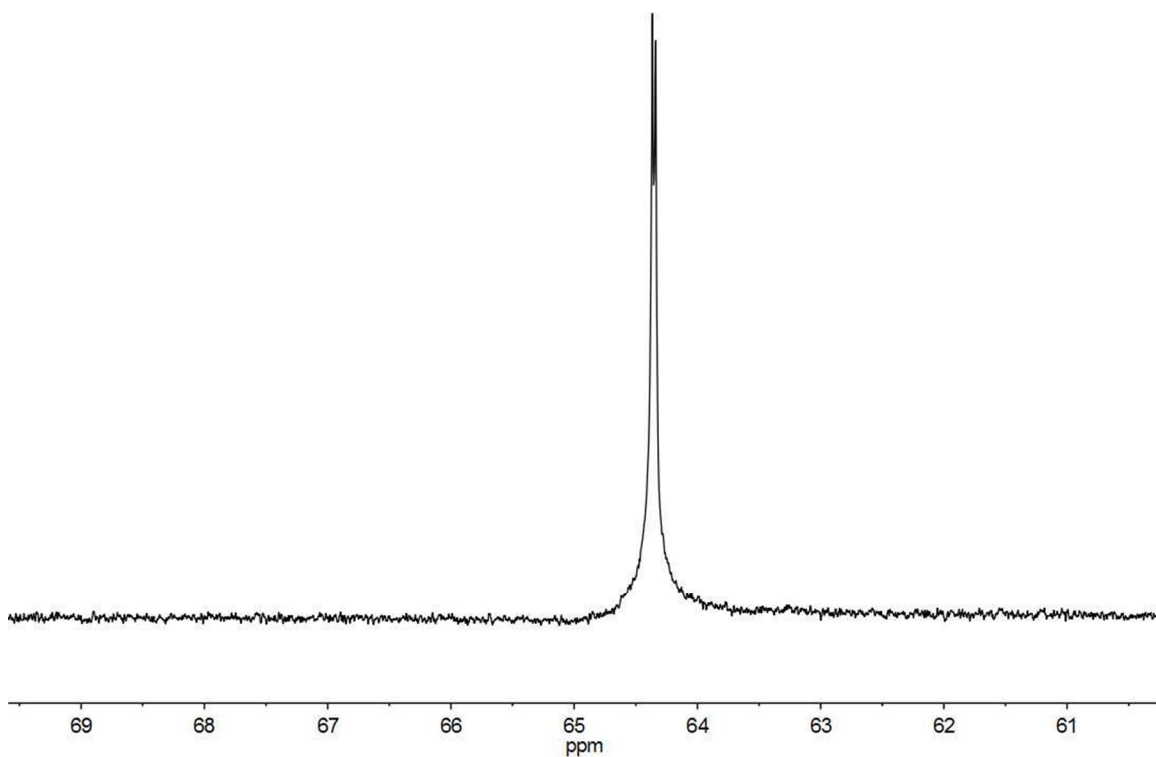

**Figure S17.**  $^{31}\text{P}\{^1\text{H}\}$  NMR spectrum ( $\text{CH}_2\text{Cl}_2$ , 202 MHz) of  $[\text{2D}]\text{BF}_4$ .

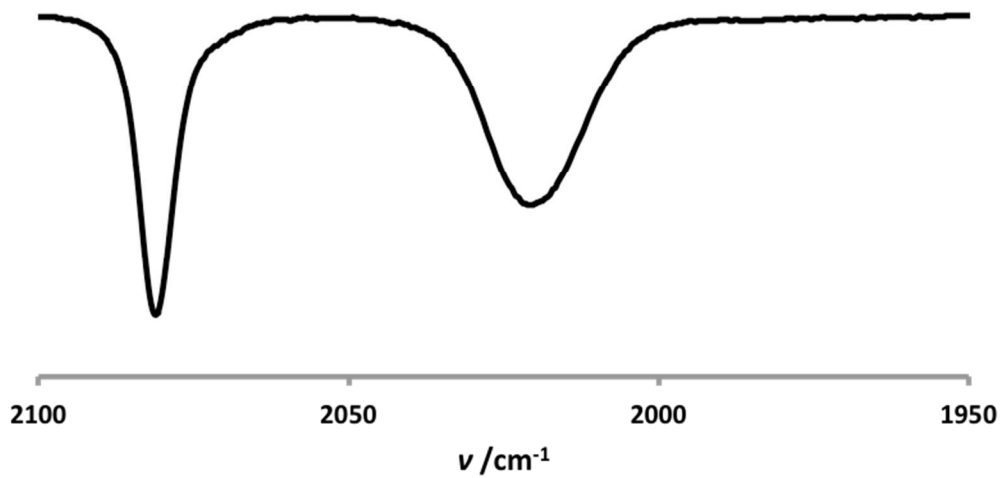

**Figure S18.** FT-IR spectrum ( $\nu_{\text{CO}}$  region,  $\text{CH}_2\text{Cl}_2$ ) of  $[\text{2D}]\text{BF}_4$ .

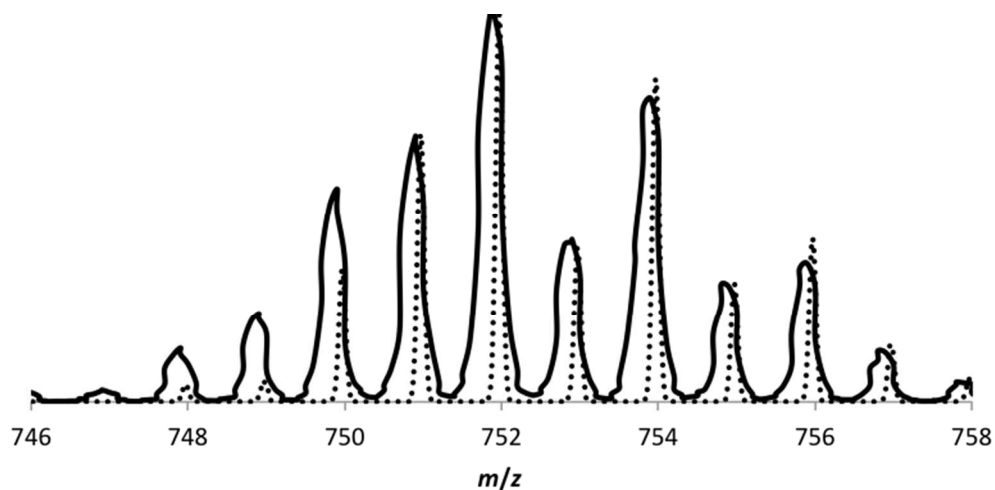

**Figure S19.** Positive ion ESI mass spectrum of [2D]BF<sub>4</sub>. The simulated spectrum is presented as a dotted trace.

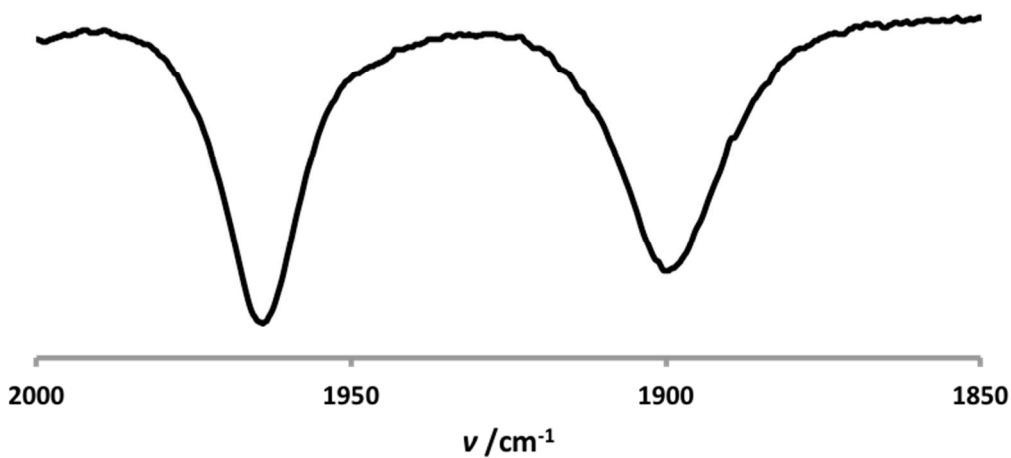

**Figure S20.** FT-IR spectrum ( $\nu_{\text{CO}}$  region, CH<sub>2</sub>Cl<sub>2</sub>) of [2']BF<sub>4</sub>.

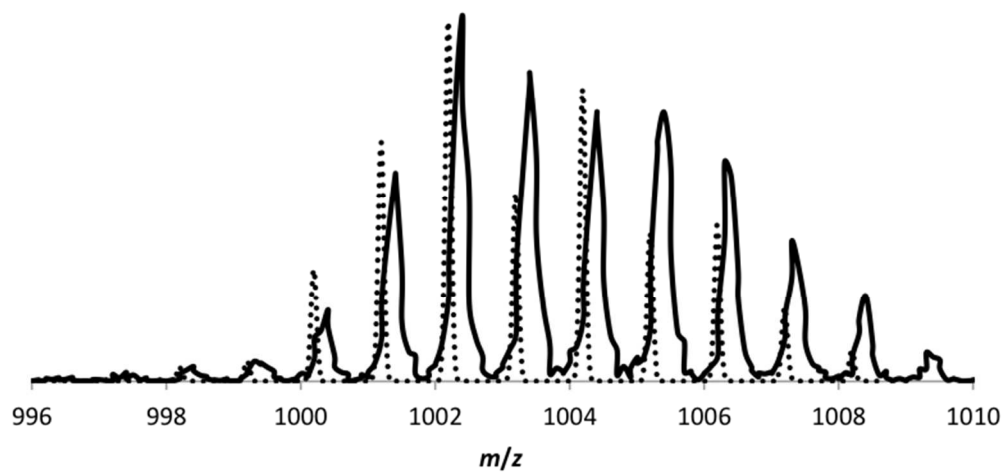

**Figure S21.** Positive ion ESI mass spectrum of [2']BF<sub>4</sub>. The simulated spectrum is presented as a dotted trace.

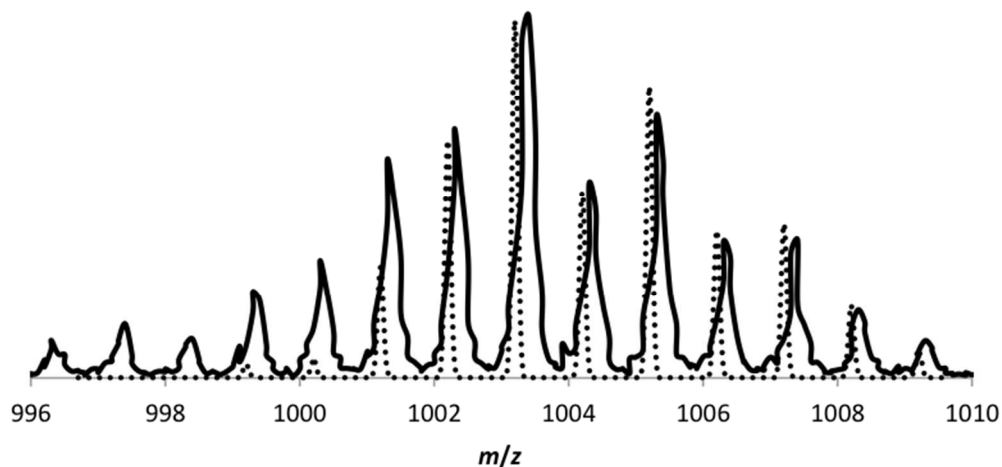

**Figure S22.** Positive ion ESI mass spectrum of  $[2']\text{BF}_4$  after 2 d in  $\text{CH}_2\text{Cl}_2$ . The simulated spectrum is presented as a dotted trace.

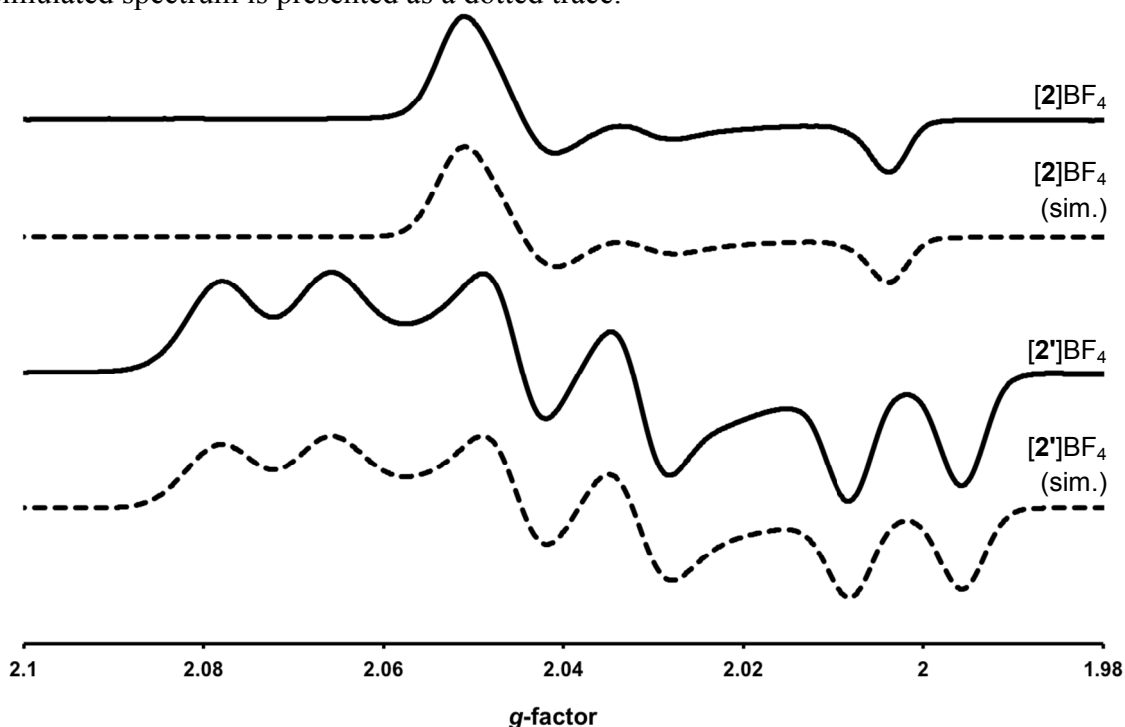

**Figure S23.** X-band EPR spectra ( $\text{CH}_2\text{Cl}_2/\text{PhMe}$ , 110 K) of  $[2]\text{BF}_4$  and  $[2']\text{BF}_4$ . The simulated spectra are presented as dotted traces.

**Table S1.** EPR Simulation Parameters for  $[2]\text{BF}_4$  (Two Conformers) and  $[2']\text{BF}_4$ .

|                   | <b>g-factor</b>     | $A(^{31}\text{P})/\text{MHz}$ | <b>line width /G</b> | <b>relative abundance</b> |
|-------------------|---------------------|-------------------------------|----------------------|---------------------------|
| $[2]\text{BF}_4$  | 2.053, 2.046, 2.005 | —                             | 10, 8, 6             | 0.74                      |
|                   | 2.050, 2.032, 2.006 | —                             | 15, 10, 9            | 0.26                      |
| $[2']\text{BF}_4$ | 2.072, 2.038, 2.002 | 54, 61, 57                    | 11, 9, 8             | 1.00                      |

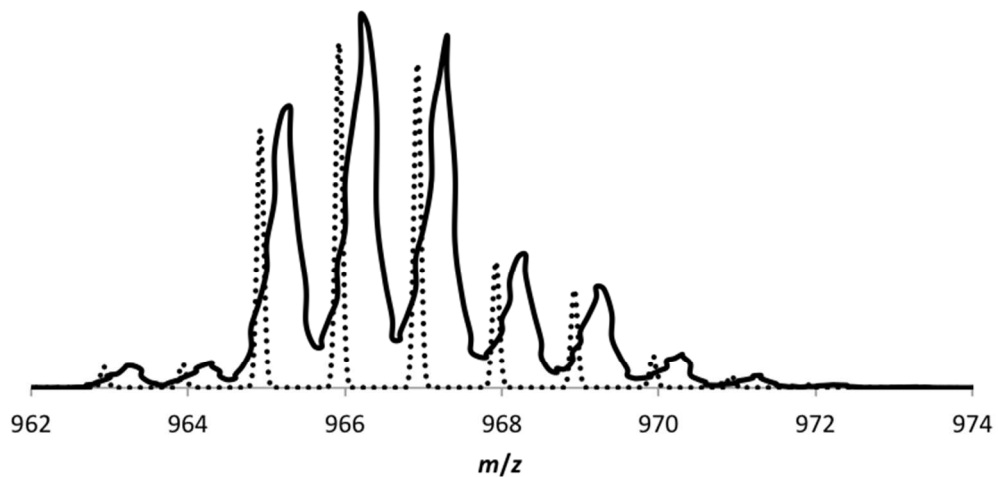

**Figure S24:** Positive ion ESI mass spectrum of  $[3I]^+$  generated from (pdt)Pt(dppe) and  $FeI_2(CO)_4$ . The simulated spectrum is presented as a dotted trace.

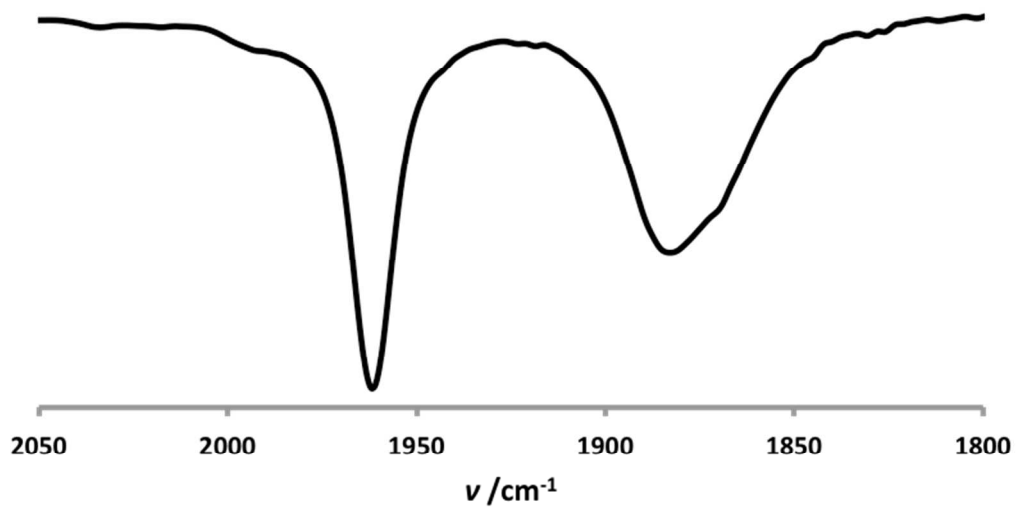

**Figure S25.** FT-IR spectrum ( $\nu_{CO}$  region,  $CH_2Cl_2$ ) of **3**.

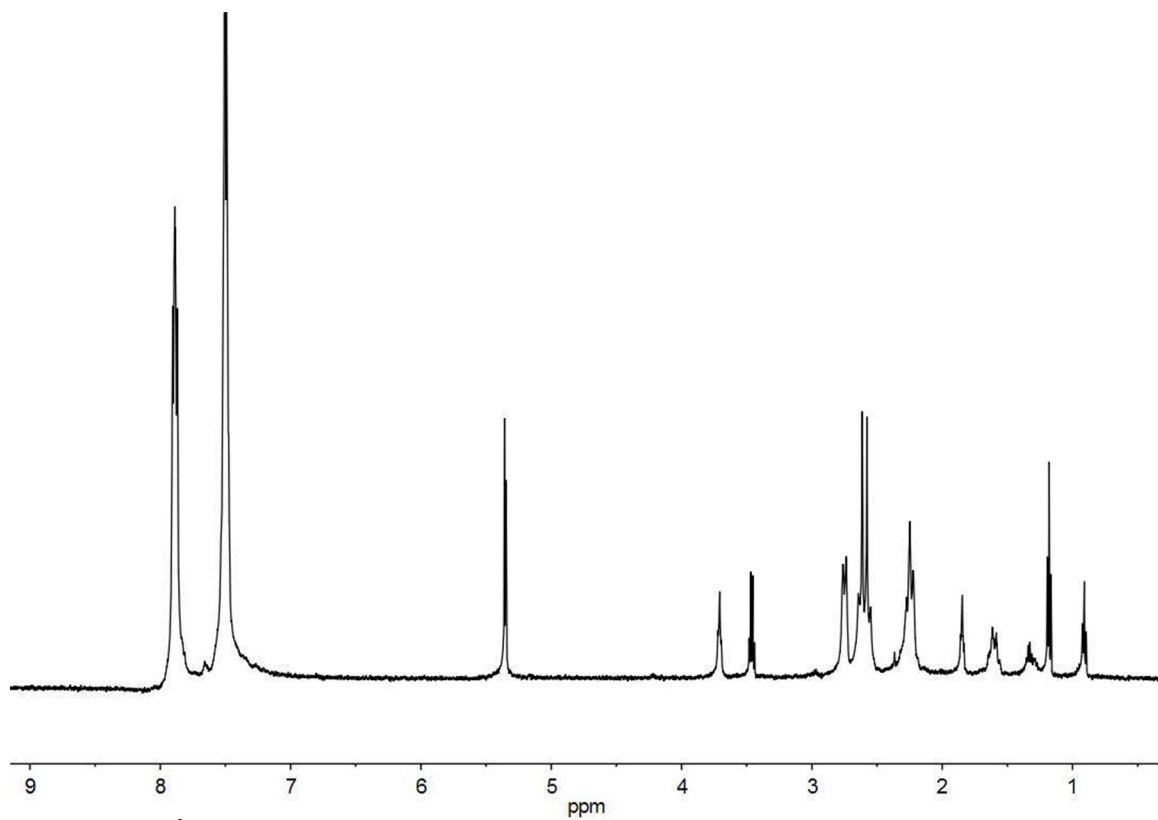

**Figure S26.**  $^1\text{H}$  NMR spectrum ( $\text{CD}_2\text{Cl}_2$ , 500 MHz) of **3**. Resonances at 3.68 (THF), 3.43 ( $\text{Et}_2\text{O}$ ), 1.83 (THF), 1.31 (pentane), 1.12 ( $\text{Et}_2\text{O}$ ) and 0.89 ppm (pentane) are from impurities.

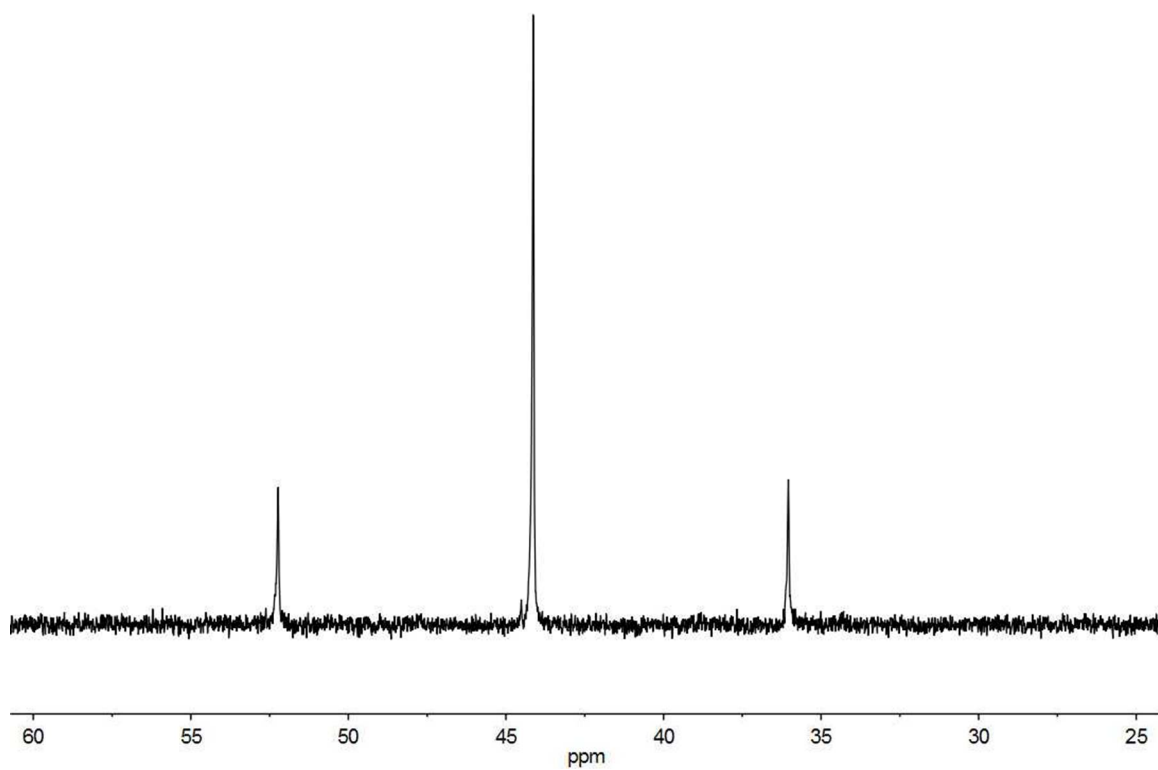



**Figure S27.**  $^{31}\text{P}\{^1\text{H}\}$  NMR spectrum ( $\text{CD}_2\text{Cl}_2$ , 202 MHz) of **3**.

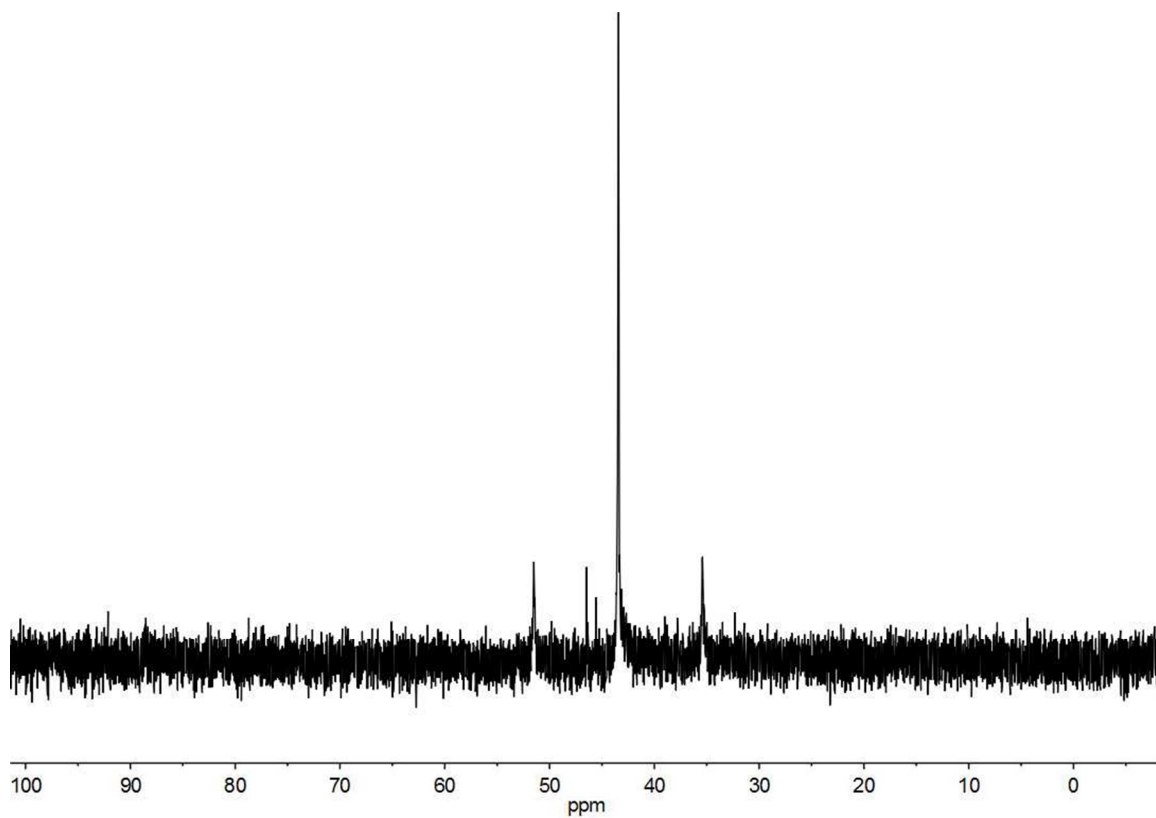

**Figure S28.**  $^{31}\text{P}\{^1\text{H}\}$  NMR spectrum ( $\text{CD}_2\text{Cl}_2$ , 202 MHz) of **3** acquired at  $-85\text{ }^\circ\text{C}$ .

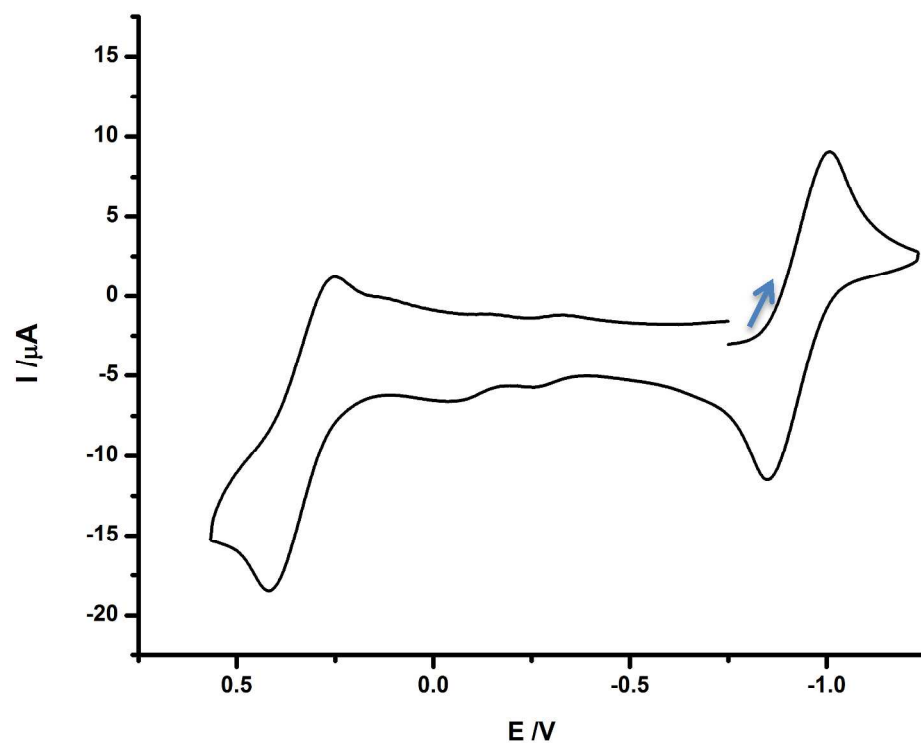

**Figure S29.** Cyclic voltammogram of **3**. *Conditions:* see Experimental.

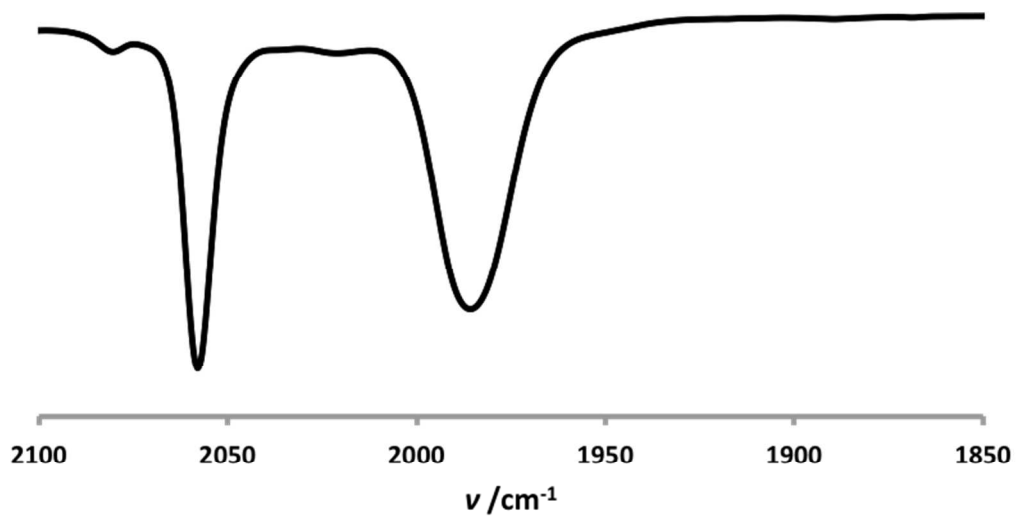

**Figure S30.** FT-IR spectrum ( $\nu_{\text{CO}}$  region,  $\text{CH}_2\text{Cl}_2$ ) of  $[\mathbf{3}]\text{BF}_4$ . Manipulation of this compound should be performed quickly in order to avoid H atom abstraction to form  $[\mathbf{3H}]\text{BF}_4$  ( $\nu_{\text{CO}} = 2081, 2022 \text{ cm}^{-1}$ ).

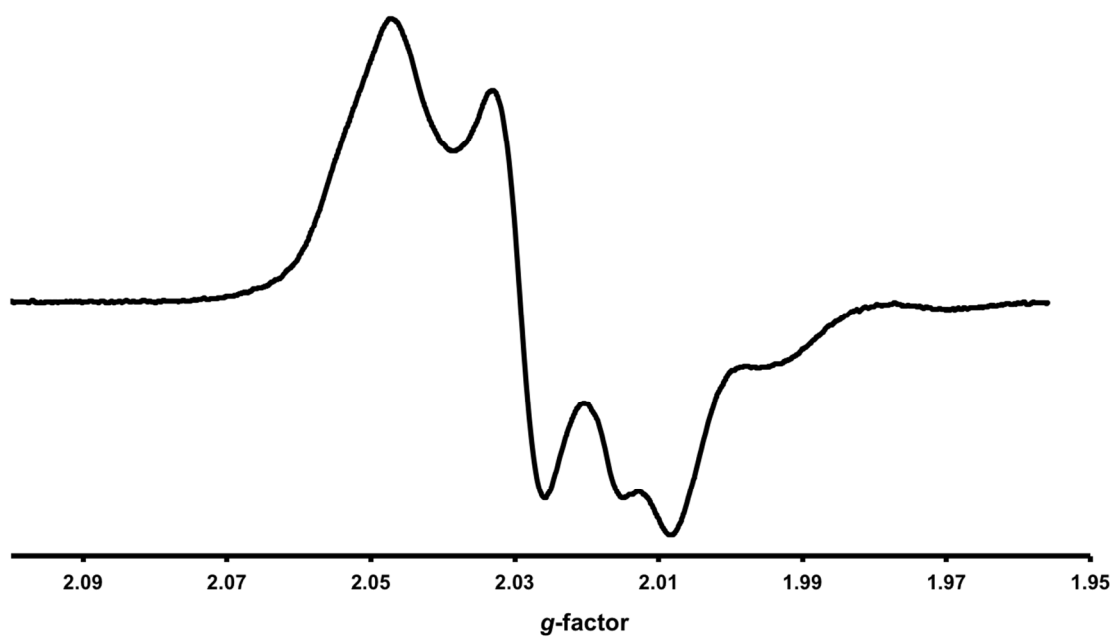

**Figure S31.** X-band EPR spectrum (CH<sub>2</sub>Cl<sub>2</sub>/PhMe, 120 K) of [3]BF<sub>4</sub>.

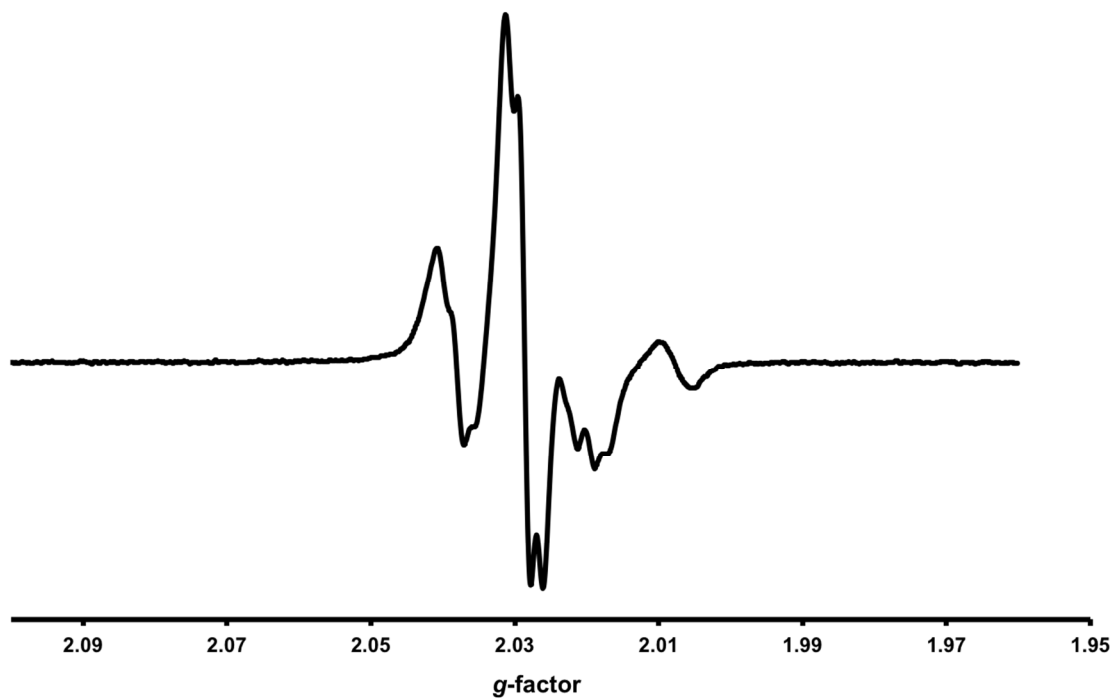

**Figure S32.** X-band EPR spectrum (CH<sub>2</sub>Cl<sub>2</sub>/PhMe, RT) of [3]BF<sub>4</sub>.

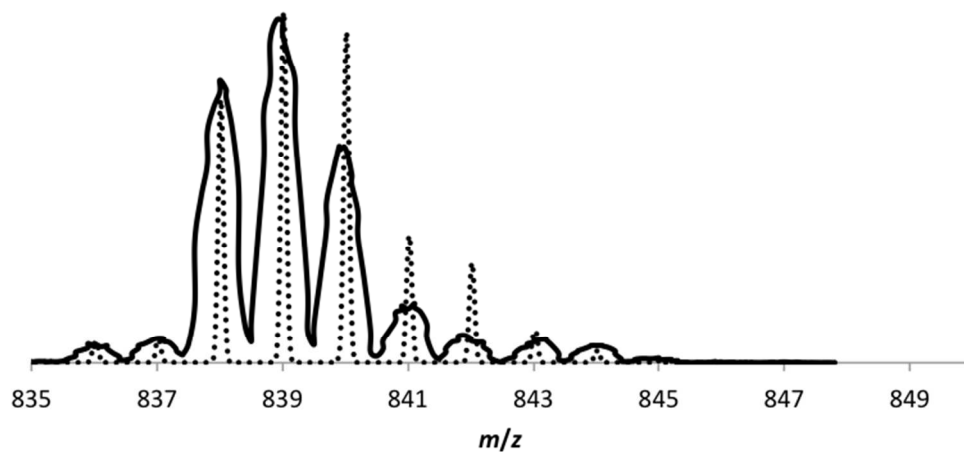

**Figure S33.** Positive ion ESI mass spectrum of  $[3]BF_4$ . The simulated spectrum is presented as a dotted trace.

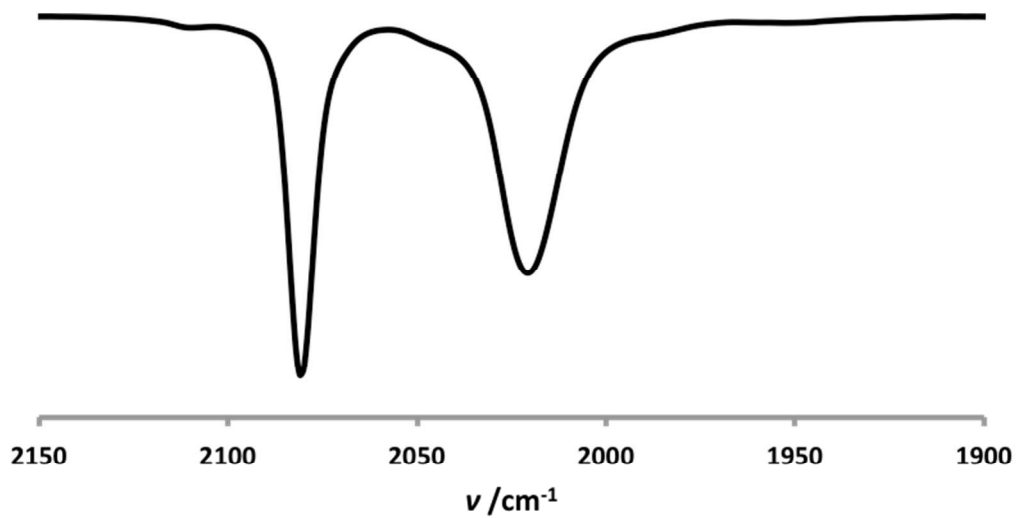

**Figure S34.** FT-IR spectrum ( $\nu_{\text{CO}}$  region,  $\text{CH}_2\text{Cl}_2$ ) of  $[3H]BF_4$ .

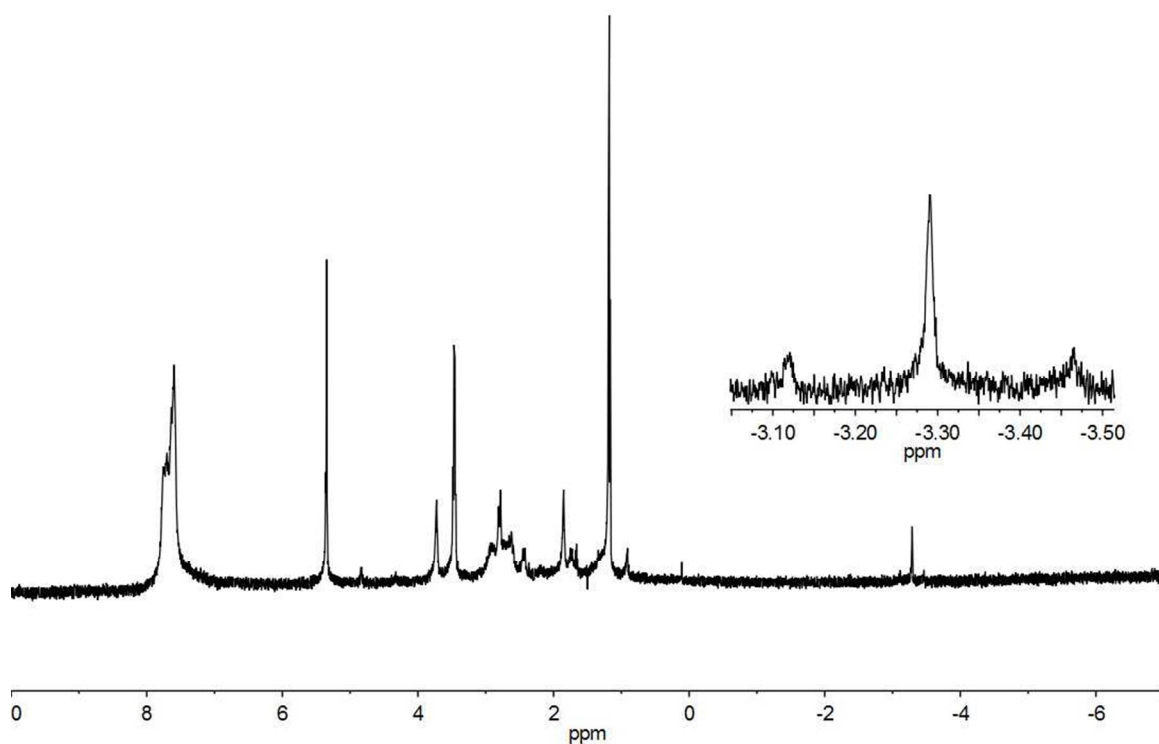

**Figure S35.**  $^1\text{H}$  NMR spectrum ( $\text{CD}_2\text{Cl}_2$ , 500 MHz) of  $[\text{3H}]\text{BF}_4$ . Resonances at 3.70 (THF), 3.43 ( $\text{Et}_2\text{O}$ ), 1.83 (THF), 1.31 (pentane), 1.12 ( $\text{Et}_2\text{O}$ ) and 0.89 ppm (pentane) are from solvent impurities.

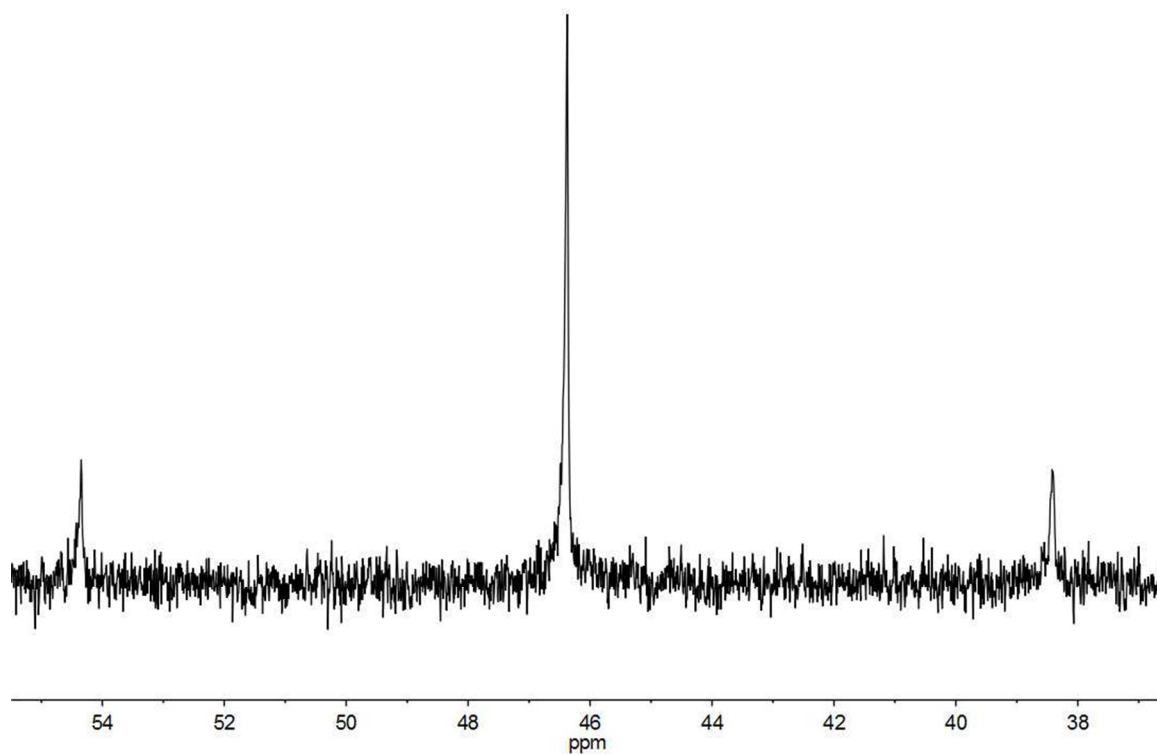

**Figure S36.**  $^{31}\text{P}\{^1\text{H}\}$  NMR spectrum ( $\text{CD}_2\text{Cl}_2$ , 202 MHz) of  $[\text{3H}]\text{BF}_4$ .

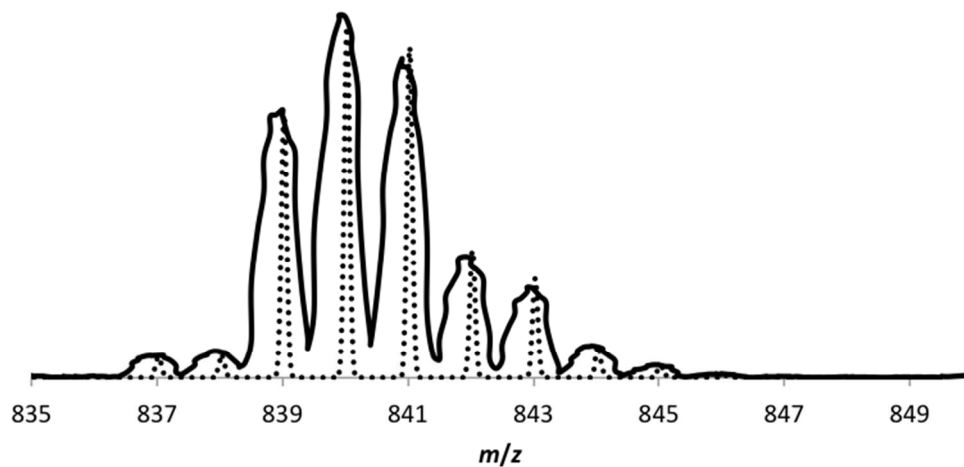

**Figure S37.** Positive ion ESI mass spectrum of  $[3\text{H}]\text{BF}_4$ . The simulated spectrum is presented as a dotted trace.

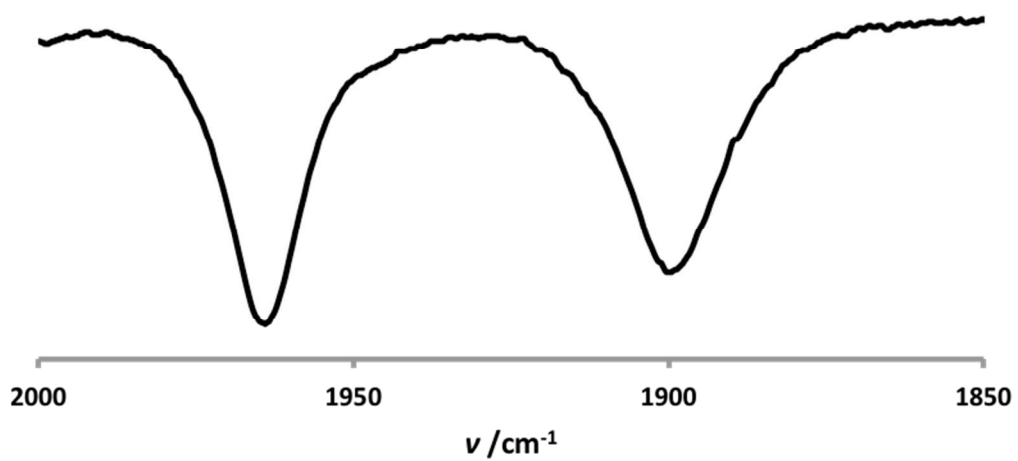

**Figure S38.** FT-IR spectrum ( $\nu_{\text{CO}}$  region,  $\text{CH}_2\text{Cl}_2$ ) of  $[3']\text{BF}_4$ .

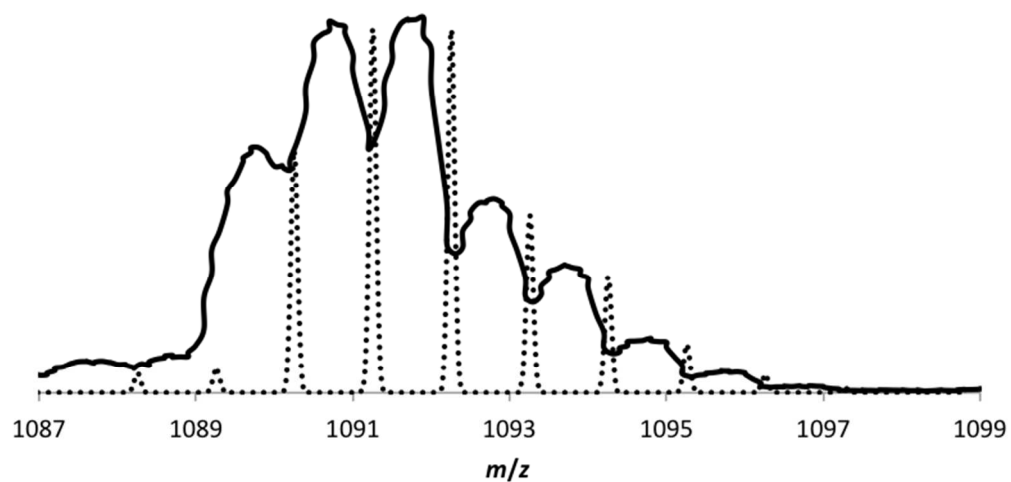

**Figure S39.** Positive ion ESI mass spectrum of  $[3']\text{BF}_4$ . The simulated spectrum is presented as a dotted trace.

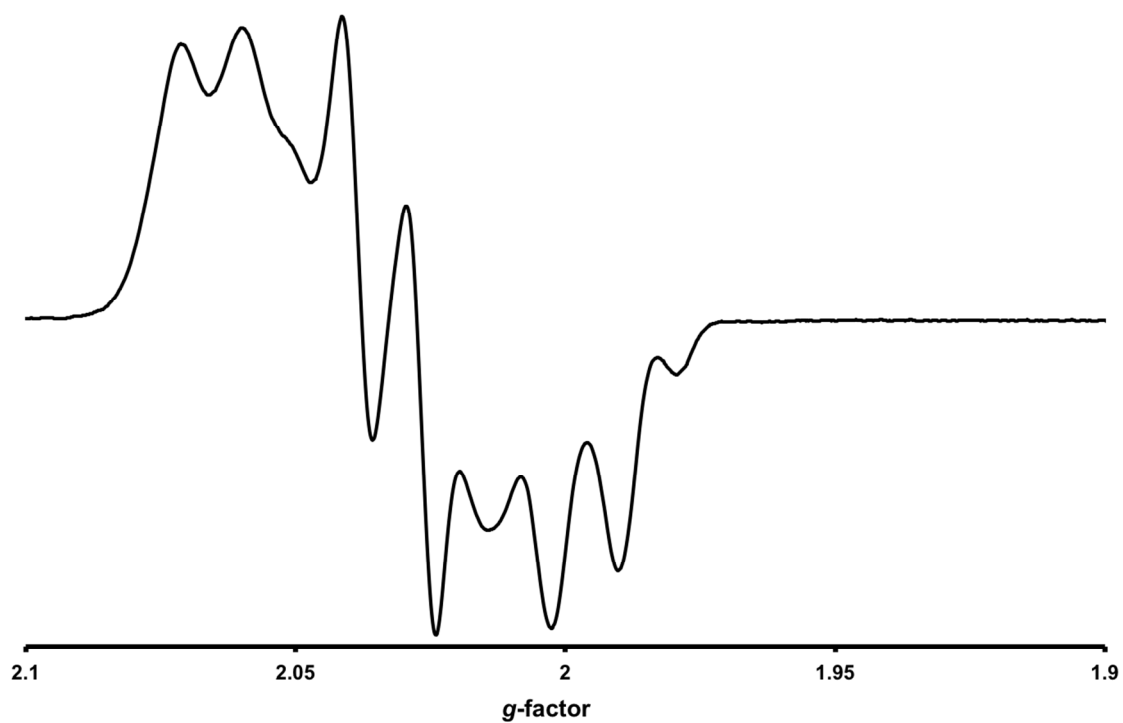

**Figure S40.** X-band EPR spectrum ( $\text{CH}_2\text{Cl}_2/\text{PhMe}$ , 120 K) of  $[3']\text{BF}_4$ .

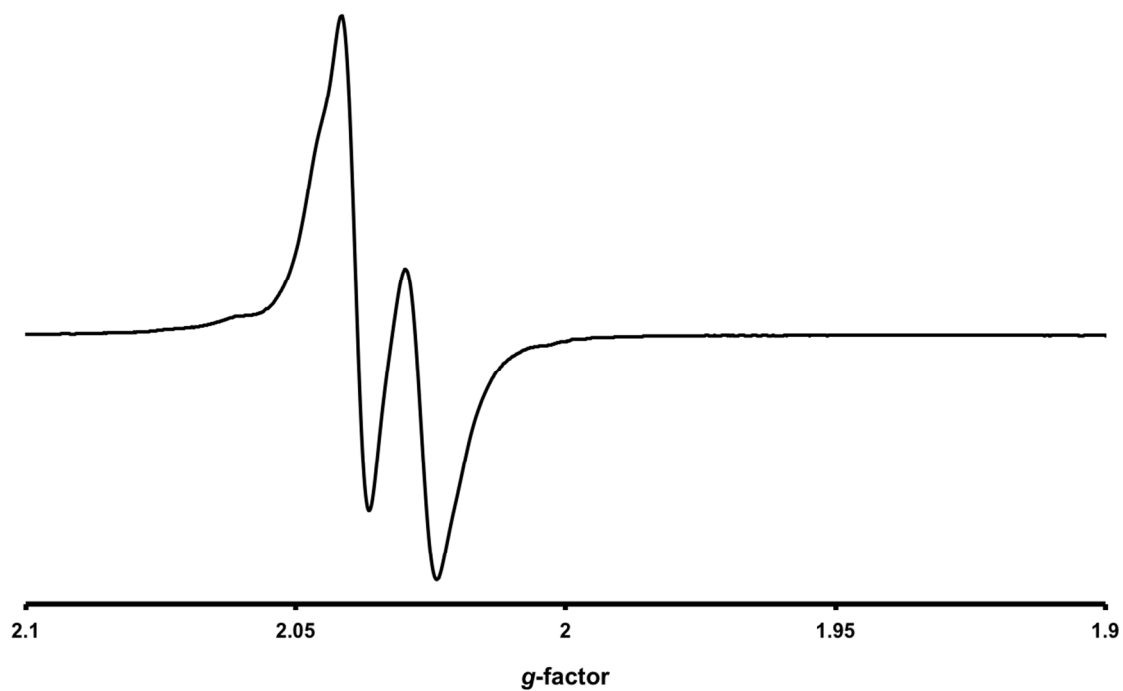

**Figure S41.** X-band EPR spectrum ( $\text{CH}_2\text{Cl}_2/\text{PhMe}$ , 290 K) of  $[\mathbf{3}']\text{BF}_4$ .

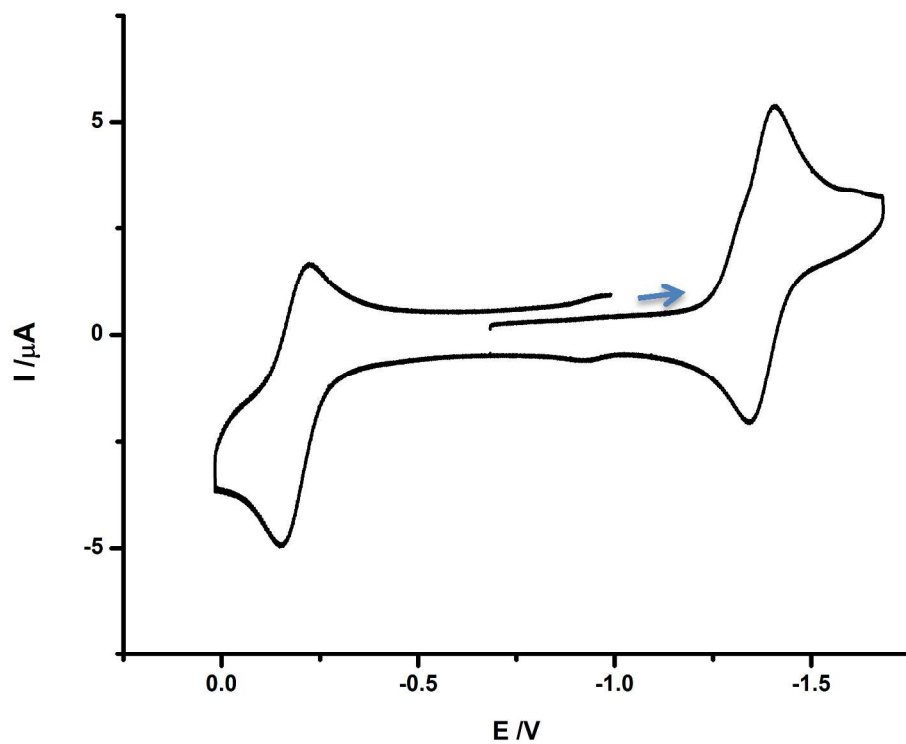

**Figure S42.** Cyclic voltammogram of  $[\mathbf{3}']\text{BF}_4$ . *Conditions:* see Experimental.



**Table S2.** Reversibility of the  $[3']^{2+/+}$  Couple is Unaffected by Scan Rate.

| $v / \text{mVs}^{-1}$ | $ i_{pa}/i_{pc} $ |
|-----------------------|-------------------|
| 100                   | 0.50              |
| 200                   | 0.51              |
| 300                   | 0.49              |
| 400                   | 0.46              |
| 500                   | 0.46              |
| 1000                  | 0.43              |

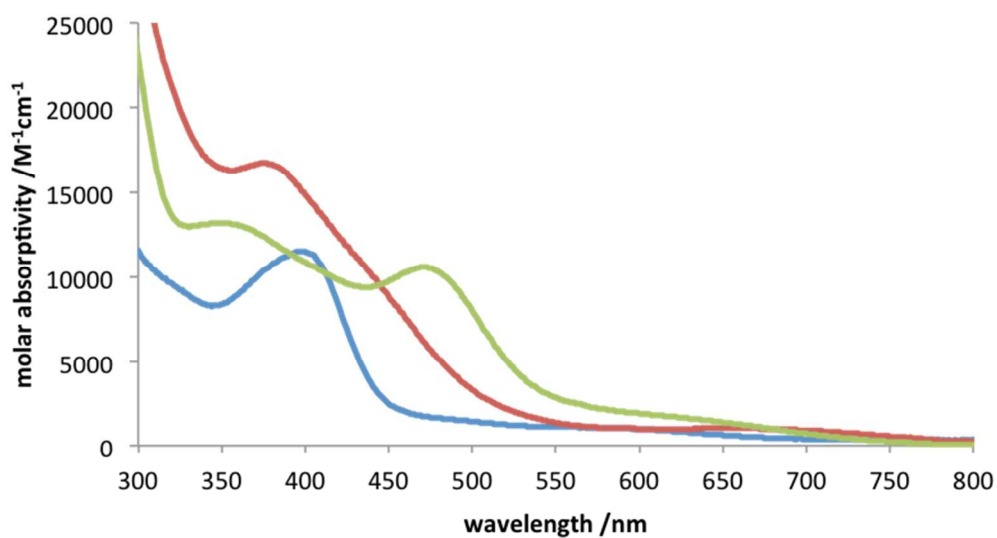**Figure S43.** UV-vis spectra of **1** (blue), **2** (red) and **3** (green trace) (0.1 mM in  $\text{CH}_2\text{Cl}_2$ )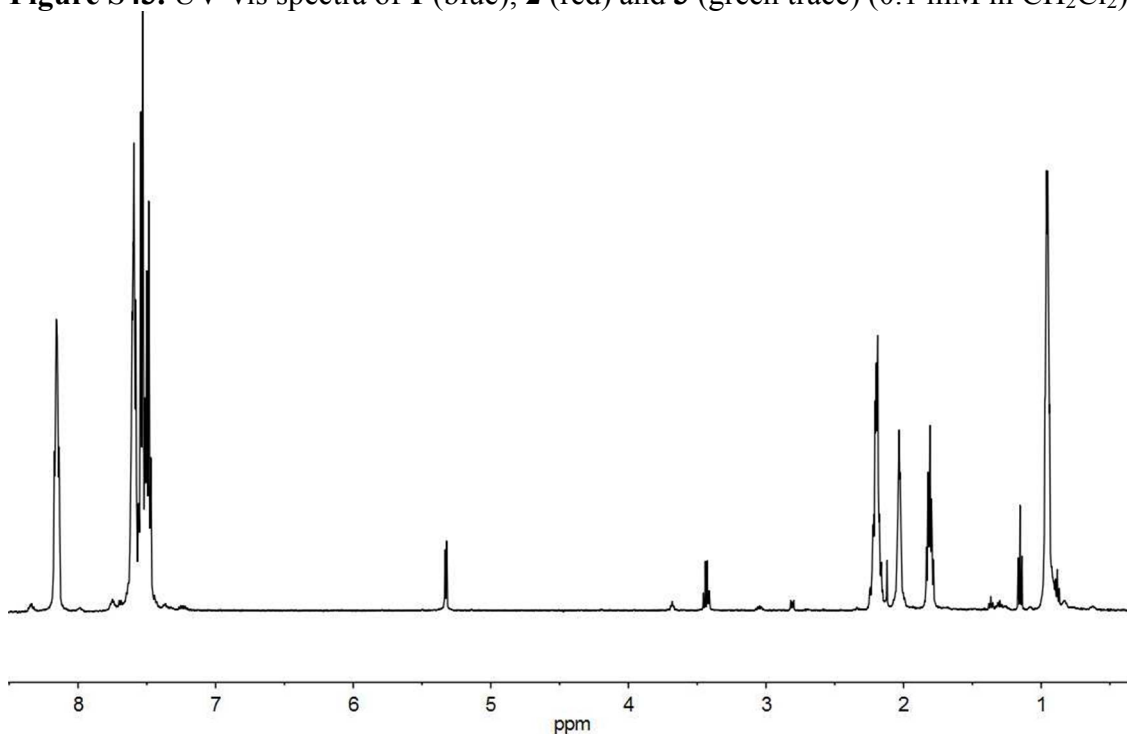**Figure S44.**  $^1\text{H}$  NMR spectrum ( $\text{CD}_2\text{Cl}_2$ , 500 MHz) of  $(\text{pdt})\text{Ni}(\text{S,S-chiraphos})$ . Resonances at 3.69 (THF), 3.43 ( $\text{Et}_2\text{O}$ ), 1.82 (THF), 1.31 (pentane), 1.12 ( $\text{Et}_2\text{O}$ ) and 0.89 ppm (pentane) are from solvent impurities.

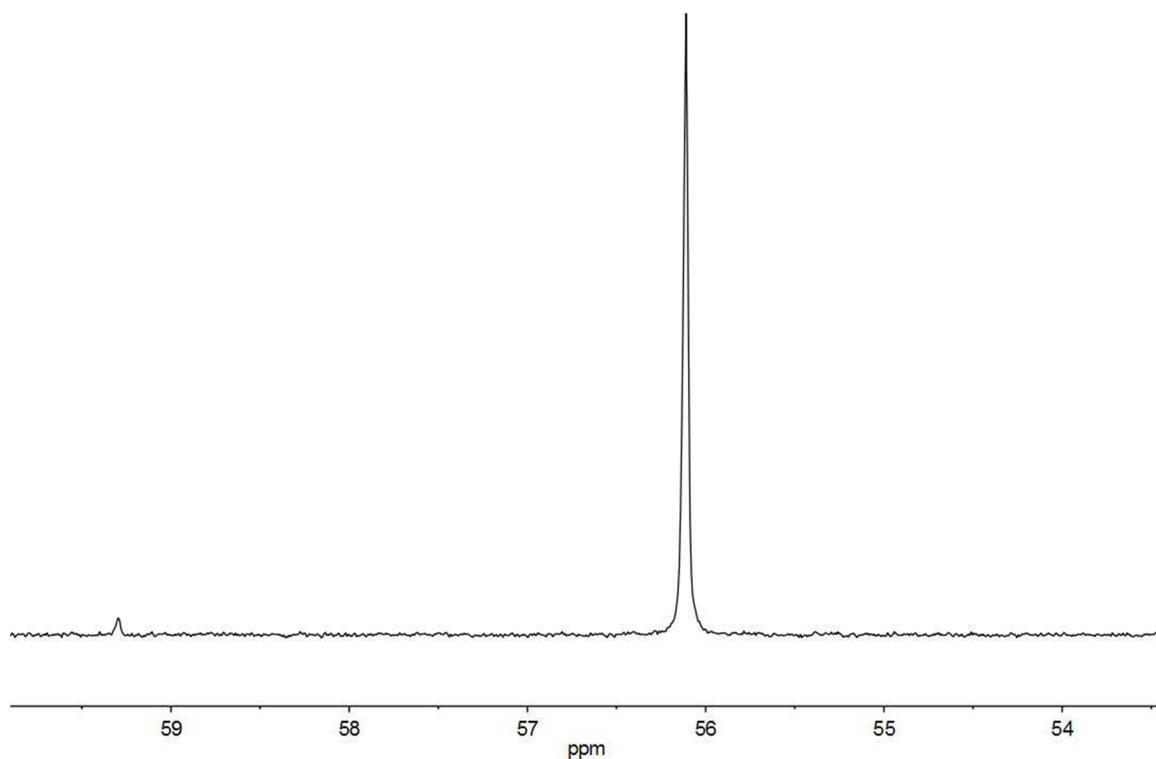

**Figure S45.**  $^{31}\text{P}\{^1\text{H}\}$  NMR spectrum ( $\text{CD}_2\text{Cl}_2$ , 202 MHz) of  $(\text{pdt})\text{Ni}(\text{S},\text{S}\text{-chiraphos})$ . The narrow linewidth ( $\sim 6$  Hz) indicates conformational dynamics that equivalence the otherwise distinct  $^{31}\text{P}$  sites.

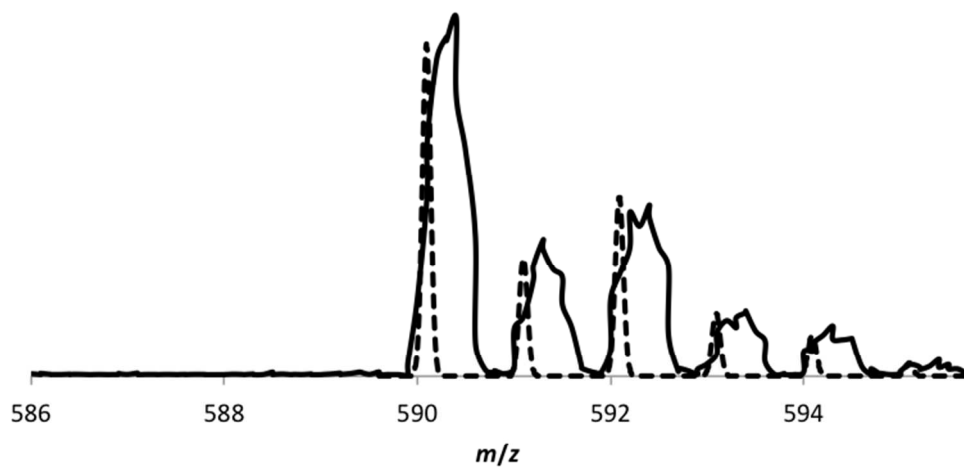

**Figure S46.** Positive ion ESI mass spectrum of  $(\text{pdt})\text{Ni}(\text{S},\text{S}\text{-chiraphos})$ . The simulated spectrum is presented as a dotted trace.

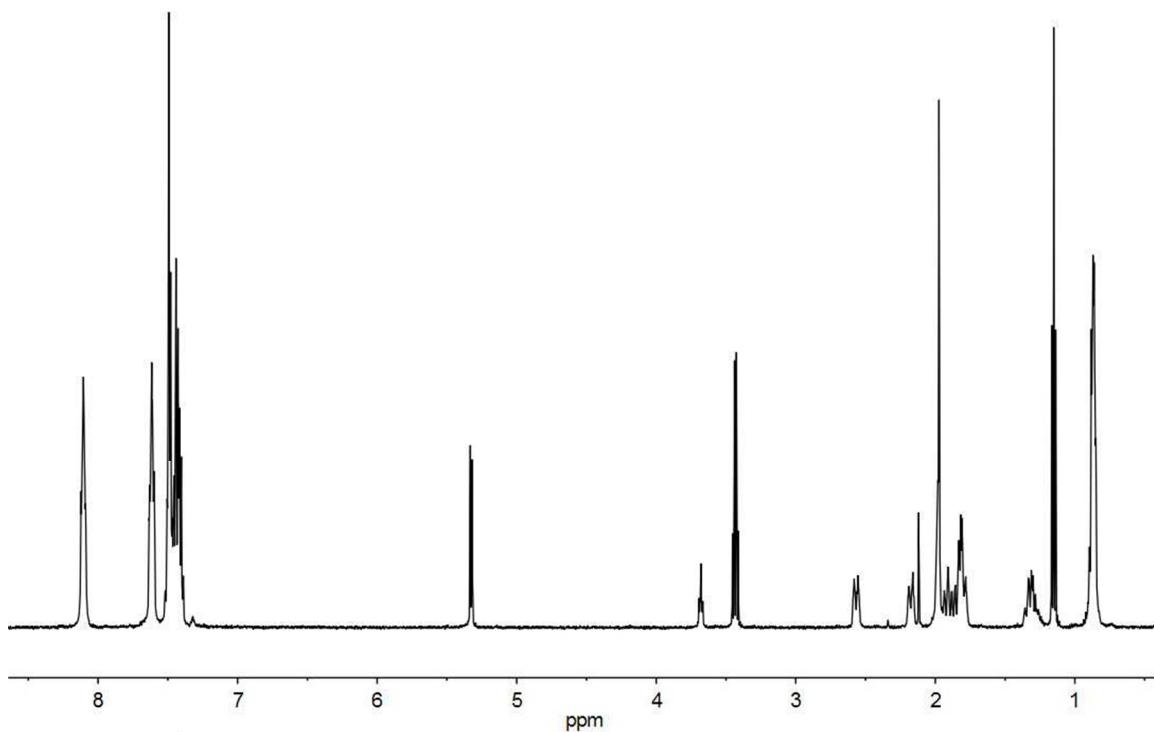

**Figure S47.**  $^1\text{H}$  NMR spectrum ( $\text{CD}_2\text{Cl}_2$ , 500 MHz) of  $(\text{CO})_3\text{Fe}(\text{pdt})\text{Ni}(\text{S},\text{S}\text{-chiraphos})$ . Resonances at 3.69 (THF), 3.43 ( $\text{Et}_2\text{O}$ ), 1.82 (THF), 1.31 (pentane), 1.12 ( $\text{Et}_2\text{O}$ ) and 0.89 ppm (pentane) are from solvent impurities.

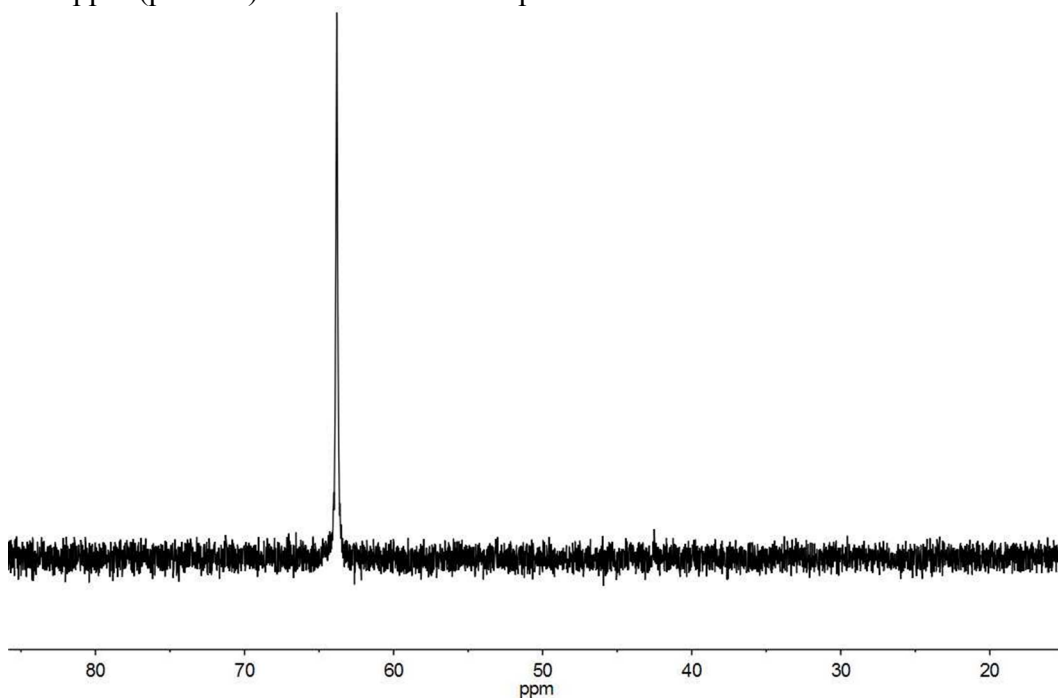

**Figure S48.**  $^{31}\text{P}\{^1\text{H}\}$  NMR spectrum ( $\text{CD}_2\text{Cl}_2$ , 202 MHz) of  $(\text{CO})_3\text{Fe}(\text{pdt})\text{Ni}(\text{S},\text{S}\text{-chiraphos})$ . If recrystallization is not performed correctly, an orange  $(\text{CO})_2\text{Ni}(\text{S},\text{S}\text{-chiraphos})$  impurity is observed (53.0 ppm,  $\nu_{\text{CO}} = 2001\text{ cm}^{-1}$ ). This is easily removed by recrystallization until a pale olive filtrate is obtained.

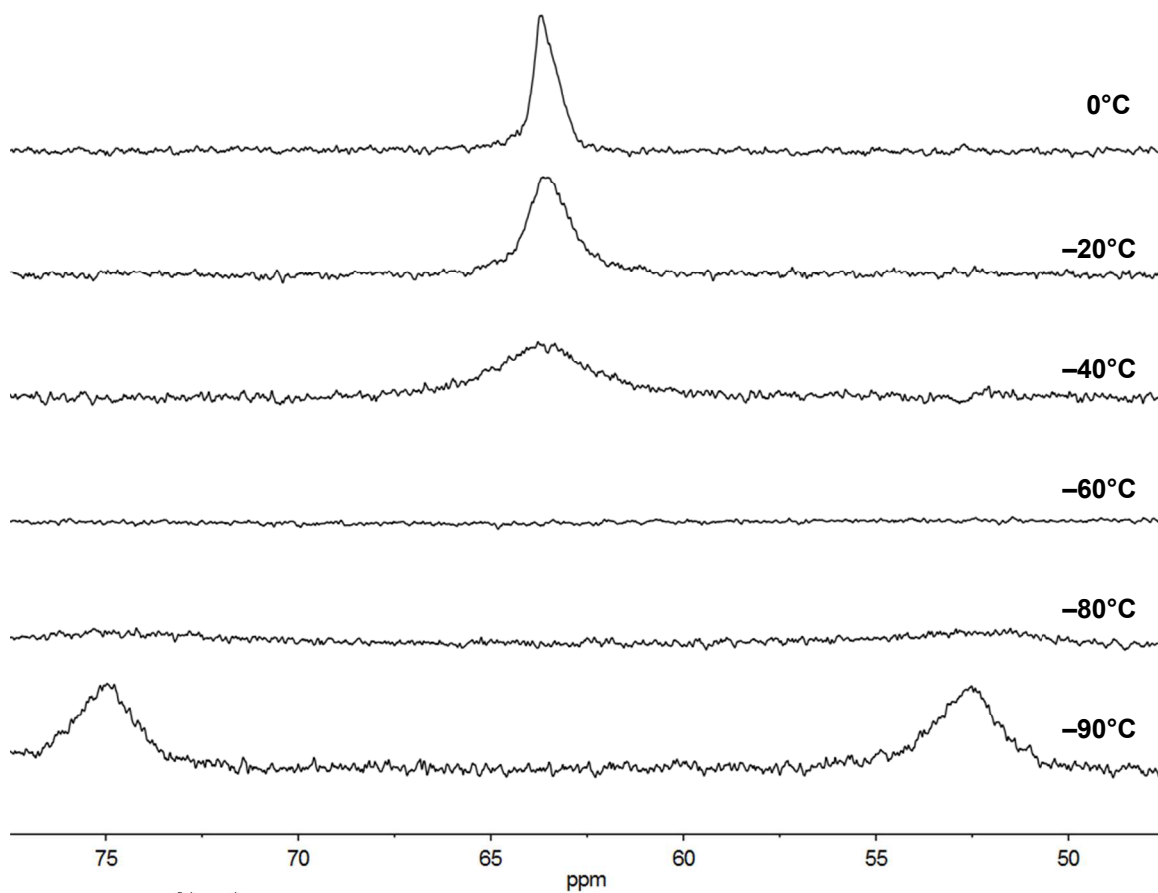

**Figure S49.**  $^{31}\text{P}\{^1\text{H}\}$  NMR ( $\text{CH}_2\text{Cl}_2$ , 202 MHz) of  $(\text{CO})_3\text{Fe}(\text{pdt})\text{Ni}(\text{S,S-chiraphos})$  acquired at different temperatures.

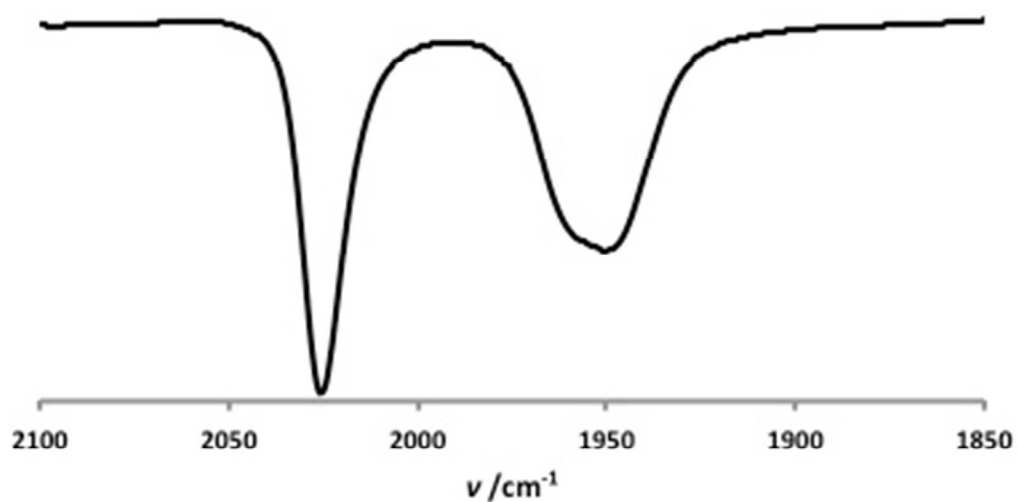

**Figure S50.** FT-IR spectrum ( $\nu_{\text{CO}}$  region,  $\text{CH}_2\text{Cl}_2$ ) of  $(\text{CO})_3\text{Fe}(\text{pdt})\text{Ni}(\text{S,S-chiraphos})$ .

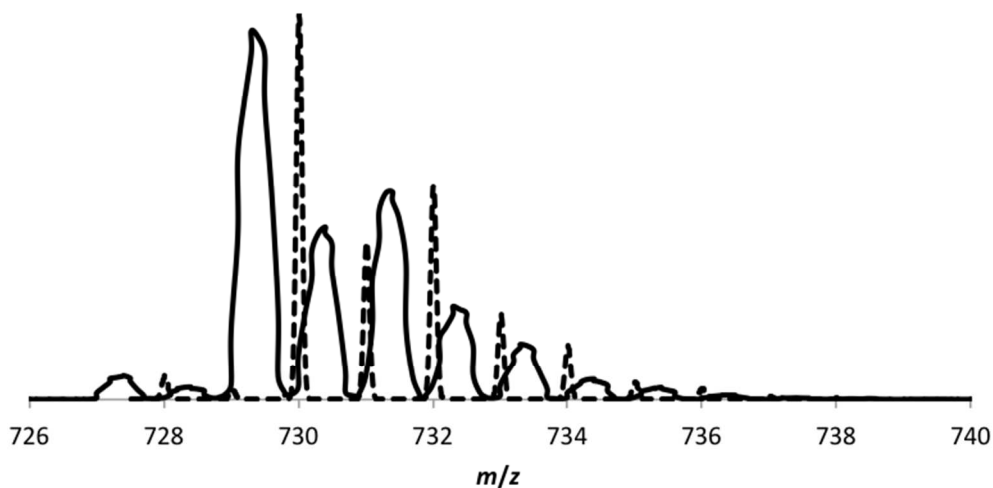

**Figure S51.** Positive ion ESI mass spectrum of  $(\text{CO})_3\text{Fe}(\text{pdt})\text{Ni}(\text{S,S-chiraphos})$ . The simulated spectrum is presented as a dotted trace.

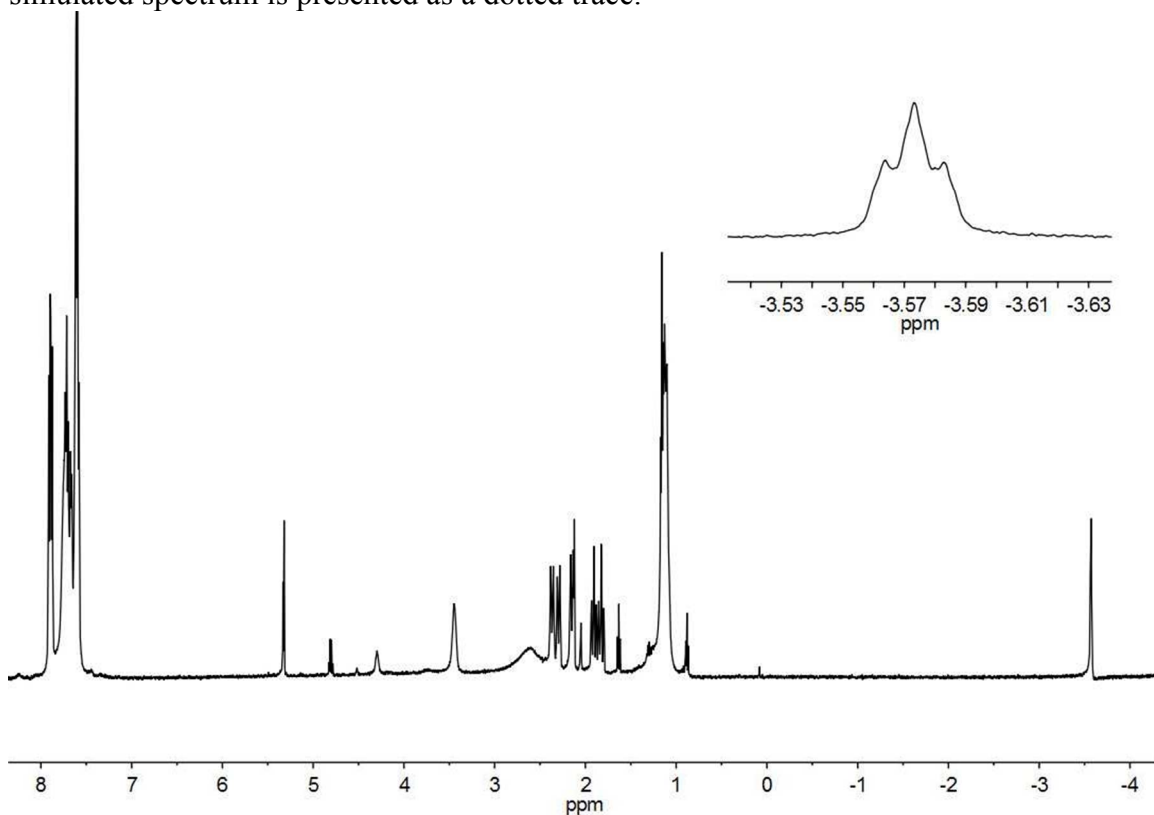

**Figure S52.**  $^1\text{H}$  NMR ( $\text{CD}_2\text{Cl}_2$ , 500 MHz) spectrum of  $[(\text{CO})_3\text{FeH}(\text{pdt})\text{Ni}(\text{S,S-chiraphos})]\text{BF}_4$ . Resonances at 3.43 ( $\text{Et}_2\text{O}$ ), 1.31 (pentane), 1.12 ( $\text{Et}_2\text{O}$ ) and 0.89 ppm (pentane) are from solvent impurities.

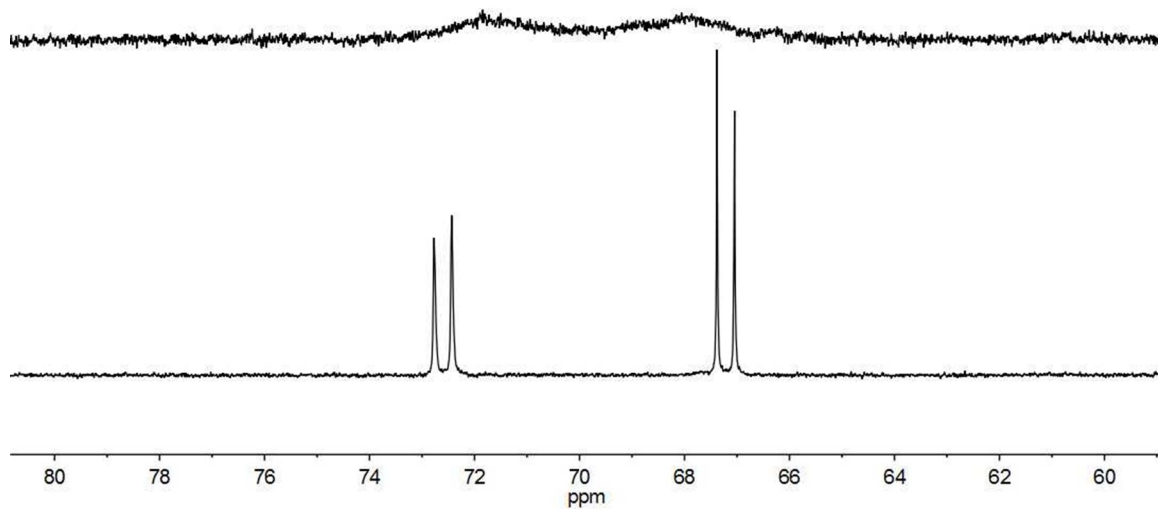

**Figure S53.**  $^{31}\text{P}\{^1\text{H}\}$  NMR spectrum ( $\text{CD}_2\text{Cl}_2$ , 202 MHz) of  $[(\text{CO})_3\text{FeH}(\text{pdt})\text{Ni}(\text{S},\text{S}\text{-chiraphos})]\text{BF}_4$  acquired at room temperature (top trace) and  $-70^\circ\text{C}$  (bottom trace).

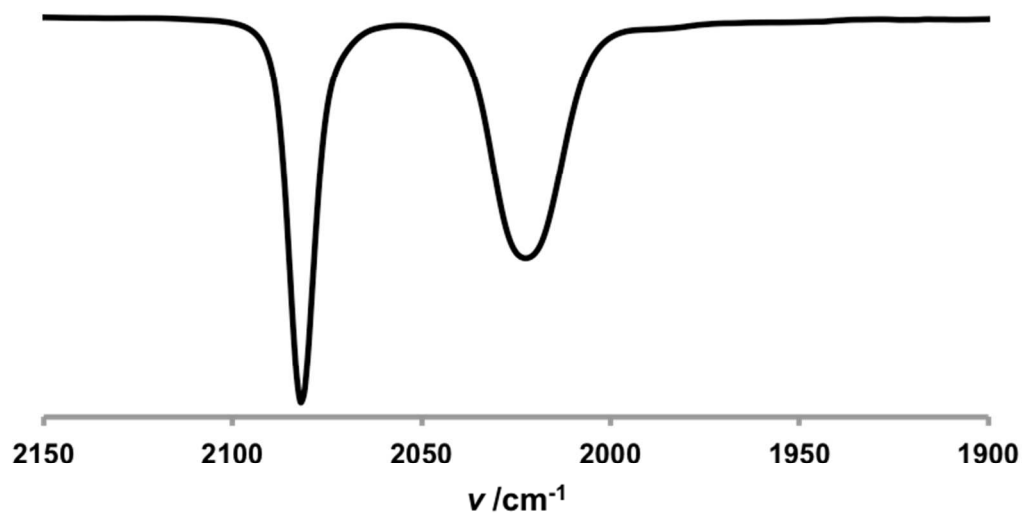

**Figure S54.** FT-IR ( $\nu_{\text{CO}}$  region,  $\text{CH}_2\text{Cl}_2$ ) of  $[(\text{CO})_3\text{FeH}(\text{pdt})\text{Ni}(\text{S},\text{S}\text{-chiraphos})]\text{BF}_4$ .

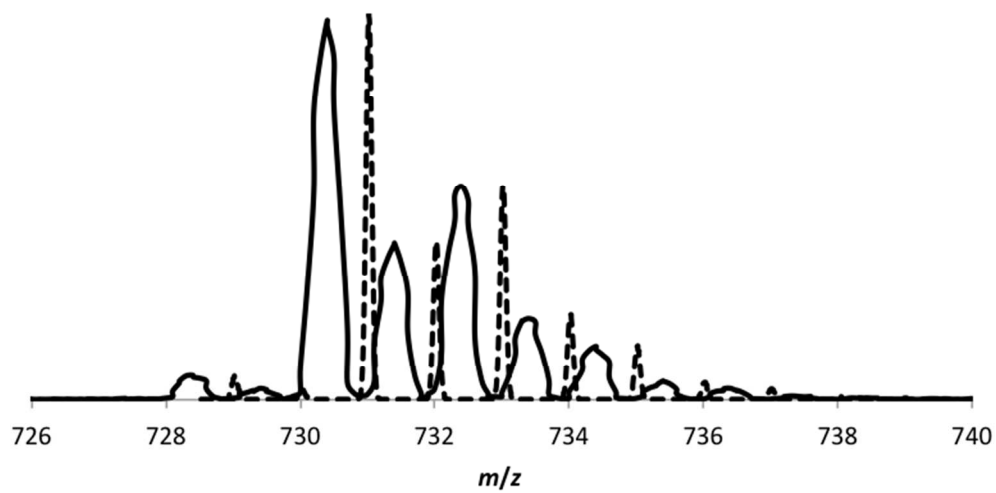

**Figure S55.** Positive ion ESI mass spectrum of  $[(\text{CO})_3\text{FeH}(\text{pdt})\text{Ni}(\text{S,S-chiraphos})]\text{BF}_4$ . The simulated spectrum is presented as a dotted trace.

**Table S3.** Selected Bond Lengths (Å) and Angles (°) for **1-3**, Determined Experimentally (X-ray Crystallography) and Computationally (DFT).

|                       | (OC) <sub>3</sub> Fe(pdt)Ni(dppe)<br>(1) |        | (OC) <sub>3</sub> Fe(pdt)Pd(dppe)<br>(2) |        | (OC) <sub>3</sub> Fe(pdt)Pt(dppe)<br>(3) |        |
|-----------------------|------------------------------------------|--------|------------------------------------------|--------|------------------------------------------|--------|
|                       | expt                                     | calc   | expt                                     | calc   | expt                                     | calc   |
| M-Fe                  | 2.47                                     | 2.42   | 2.56                                     | 2.56   | n/a                                      | 2.87   |
| M-P <sup>a</sup>      | 2.15                                     | 2.16   | 2.26                                     | 2.26   | n/a                                      | 2.28   |
| M-S <sup>a</sup>      | 2.25                                     | 2.30   | 2.49                                     | 2.49   | n/a                                      | 2.38   |
| Fe-S <sup>a</sup>     | 2.28                                     | 2.29   | 2.29                                     | 2.30   | n/a                                      | 2.36   |
| Fe-C <sup>a</sup>     | 1.80                                     | 1.80   | 1.80                                     | 1.77   | n/a                                      | 1.75   |
| P-M-S <sup>a</sup>    | 117.06                                   | 114.50 | 128.85                                   | 135.12 | n/a                                      | 176.89 |
| S-Fe-C <sup>a,b</sup> | 161.65                                   | 161.27 | 162.66                                   | 161.07 | n/a                                      | 153.12 |

<sup>a</sup>These bond distances/angles are average values. <sup>b</sup>Values for S-Fe-CO<sub>trans</sub>.

**Table S4.** Selected Bond Lengths (Å) and Angles (°) for [1-3H]<sup>+</sup>, Determined Experimentally (X-ray Crystallography) and Computationally (DFT).

|                       | [1H] <sup>+</sup> |        | [2H] <sup>+</sup> |        | [3H] <sup>+</sup> |        |
|-----------------------|-------------------|--------|-------------------|--------|-------------------|--------|
|                       | expt              | calc   | expt              | calc   | expt              | calc   |
| M-Fe                  | 2.61              | 2.64   | 2.85              | 2.92   | n/a               | 2.97   |
| M-H                   | 1.64              | 1.87   | 2.17              | 2.19   | n/a               | 2.23   |
| Fe-H                  | 1.46              | 1.56   | 1.47              | 1.54   | n/a               | 1.54   |
| M-P <sup>a</sup>      | 2.17              | 2.19   | 2.26              | 2.30   | n/a               | 2.29   |
| M-S <sup>a</sup>      | 2.21              | 2.23   | 2.37              | 2.39   | n/a               | 2.41   |
| Fe-S <sup>a</sup>     | 2.32              | 2.34   | 2.34              | 2.35   | n/a               | 2.36   |
| Fe-C <sup>a</sup>     | 1.80              | 1.79   | 1.80              | 1.79   | n/a               | 1.79   |
| M-H-Fe                | 114.94            | 100.12 | 101.18            | 101.24 | n/a               | 102.25 |
| P-M-S <sup>a</sup>    | 176.73            | 178.73 | 177.39            | 176.56 | n/a               | 176.17 |
| S-Fe-C <sup>a,b</sup> | 166.35            | 165.99 | 166.53            | 165.75 | n/a               | 165.24 |

<sup>a</sup>These bond distances/angles are average values. <sup>b</sup>Values for S-Fe-CO<sub>trans</sub>.

**Table S5.** Selected Bond Lengths (Å) and Angles (°) for Isomers of FeM Complexes **1-3**, with Tetrahedral or Square Planar M.

|                       | (OC) <sub>3</sub> Fe(pdt)Ni(dppe)<br>(1) |               | (OC) <sub>3</sub> Fe(pdt)Pd(dppe)<br>(2) |               | (OC) <sub>3</sub> Fe(pdt)Pt(dppe)<br>(3) |               |
|-----------------------|------------------------------------------|---------------|------------------------------------------|---------------|------------------------------------------|---------------|
|                       | Tetrahedral                              | Square Planar | Tetrahedral                              | Square Planar | Tetrahedral                              | Square Planar |
| M-Fe                  | 2.42                                     | 2.55          | 2.56                                     | 2.84          | 2.57                                     | 2.87          |
| M-P <sup>a</sup>      | 2.16                                     | 2.18          | 2.26                                     | 2.30          | 2.27                                     | 2.28          |
| M-S <sup>a</sup>      | 2.30                                     | 2.22          | 2.49                                     | 2.36          | 2.64                                     | 2.38          |
| Fe-S <sup>a</sup>     | 2.29                                     | 2.34          | 2.30                                     | 2.35          | 2.31                                     | 2.36          |
| Fe-C <sup>a</sup>     | 1.80                                     | 1.75          | 1.77                                     | 1.75          | 1.77                                     | 1.75          |
| P-M-S <sup>a</sup>    | 114.50                                   | 166.46        | 135.12                                   | 176.10        | 140.21                                   | 176.89        |
| S-Fe-C <sup>a,b</sup> | 161.27                                   | 150.87        | 161.07                                   | 152.602       | 160.23                                   | 153.12        |

<sup>a</sup>These bond distances/angles are average values. <sup>b</sup>Values for S-Fe-CO<sub>trans</sub>.



**Table S6.** Calculated Reaction Free Energies ( $\Delta G^\circ$ )<sup>a</sup> for Rotation from Tetrahedral to Square Planar Geometry at the Ni(dppe) Site in (CO)<sub>3</sub>Fe(pdt)Ni(dppe) using Different Functionals.<sup>b</sup>

| Functional     | Gas-opt<br>w/ solvation <sup>c</sup> | Sol-opt<br>w/ solvation <sup>d</sup> |
|----------------|--------------------------------------|--------------------------------------|
| B3P86          | -0.67                                | -1.28                                |
| BP86           | nf <sup>e</sup>                      | -1.80                                |
| BP86-D2        | nf <sup>e</sup>                      | +3.88                                |
| B3LYP          | -1.10                                | -2.77                                |
| BLYP           | nf <sup>e</sup>                      | +0.82                                |
| TPSSh          | nf <sup>e</sup>                      | +1.11                                |
| M06L           | nf <sup>e</sup>                      | +0.93                                |
| M11L           | nf <sup>e</sup>                      | +2.71                                |
| $\omega$ B97xD | -1.28                                | -2.88                                |

<sup>a</sup>Values given in kcal/mol for the square planar geometry relative to the tetrahedral geometry. <sup>b</sup>All calculations were performed using the SDD pseudopotential and associated basis set for the Fe and Ni centers, and the 6-31G\* basis set for all other atoms. <sup>c</sup>Structures were optimized in the gas phase, and solvation free energies were calculated in CH<sub>2</sub>Cl<sub>2</sub> using C-PCM. <sup>d</sup>Structures were optimized in CH<sub>2</sub>Cl<sub>2</sub> solvent using C-PCM. <sup>e</sup>Minimum for the square planar geometry not found (nf).

**Table S7.** Calculated Reaction Free Energies ( $\Delta G^\circ$ )<sup>a</sup> for Rotation from Tetrahedral to Square Planar Geometry at the Ni(dppe) Site in (CO)<sub>3</sub>Fe(pdt)Ni(dppe) using Different Basis Sets with the BP86 Functional.

| For Ni,Fe         | For other<br>atoms | Sol-opt<br>w/ solvation <sup>b</sup> |
|-------------------|--------------------|--------------------------------------|
| SDD <sup>c</sup>  | 6-31G*             | -1.80                                |
| SDD <sup>c</sup>  | D95*               | +0.29                                |
| TZVP <sup>d</sup> | 6-31G*             | +4.20                                |
| TZVP <sup>d</sup> | D95*               | +1.28                                |
| TZVP <sup>d</sup> | TZVP               | +1.22                                |

<sup>a</sup>Values given in kcal/mol for the square planar geometry relative to the tetrahedral geometry. <sup>b</sup>Structures were optimized in CH<sub>2</sub>Cl<sub>2</sub> solvent using C-PCM. When optimizations were performed in the gas phase, a minimum was not found for the square planar geometry. <sup>c</sup>SDD pseudopotential and associated basis set used for Fe and Ni. <sup>d</sup>No pseudopotentials were used for Fe and Ni.

**Table S8.** Calculated Reaction Free Energies ( $\Delta G^\circ$ )<sup>a</sup> for Rotation from Tetrahedral to Square Planar Geometry at the M(dppe) Site in **2** and **3** using Different Functionals.<sup>b</sup>

| Functional     | (OC) <sub>3</sub> Fe(pdt)Pd(dppe) ( <b>2</b> ) |                                      | (OC) <sub>3</sub> Fe(pdt)Pt(dppe) ( <b>3</b> ) |
|----------------|------------------------------------------------|--------------------------------------|------------------------------------------------|
|                | Gas-opt<br>w/ solvation <sup>c</sup>           | Sol-opt<br>w/ solvation <sup>d</sup> | Gas-opt<br>w/ solvation <sup>c</sup>           |
| B3P86          | +0.99                                          | +2.96                                | -30.42                                         |
| BP86           | nf <sup>e</sup>                                | +1.21                                | -3.04 <sup>f</sup>                             |
| BP86-D2        | -1.86                                          | -0.48                                | -31.45                                         |
| M06L           | +0.96                                          | +5.22                                | -39.11                                         |
| $\omega$ B97xD | +1.10                                          | +1.63                                | -30.83                                         |

<sup>a</sup>Values given in kcal/mol for the square planar geometry relative to the tetrahedral geometry. <sup>b</sup>All calculations were done using the SDD pseudopotential and associated basis set for the Fe, Pd, and Pt centers, and the 6-31G\* basis set for all other atoms.

<sup>c</sup>Structures were optimized in the gas phase, and solvation free energies were calculated in CH<sub>2</sub>Cl<sub>2</sub> using C-PCM. <sup>d</sup>Structures were optimized in CH<sub>2</sub>Cl<sub>2</sub> solvent using C-PCM.

<sup>e</sup>Minimum for the square planar geometry not found (nf). <sup>f</sup>When the structures are optimized in solution,  $\Delta G^\circ = -26.81$  kcal/mol.

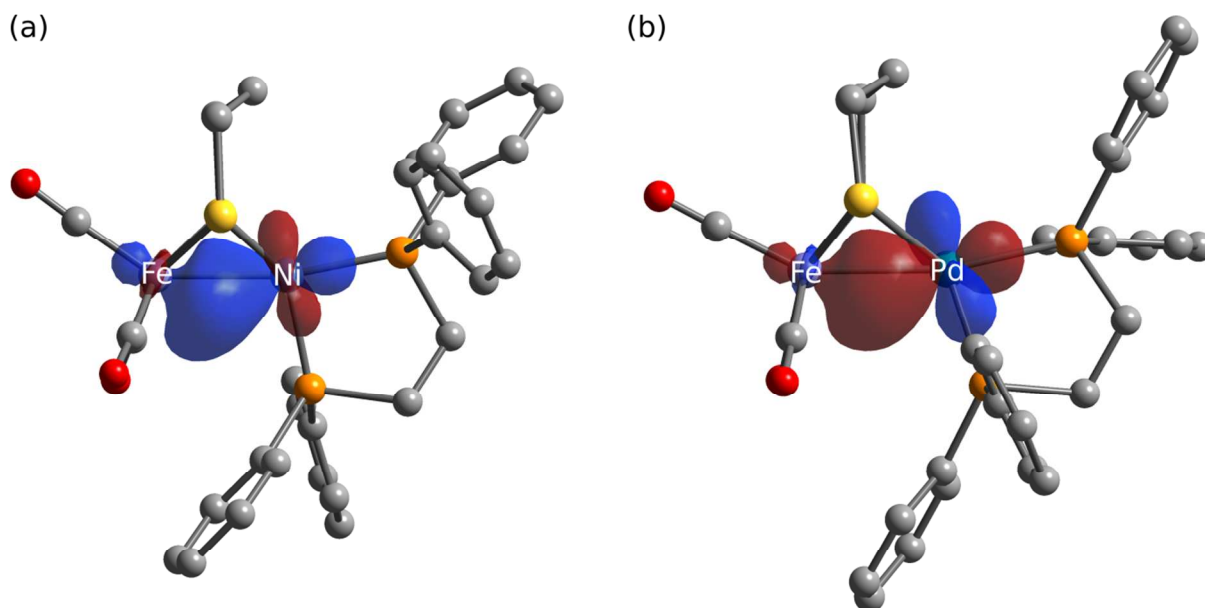**Figure S56.** Depiction of natural bonding orbitals (NBO) for (a) the Ni–Fe bond in **1** and (b) the Pd–Fe bond in **2**.

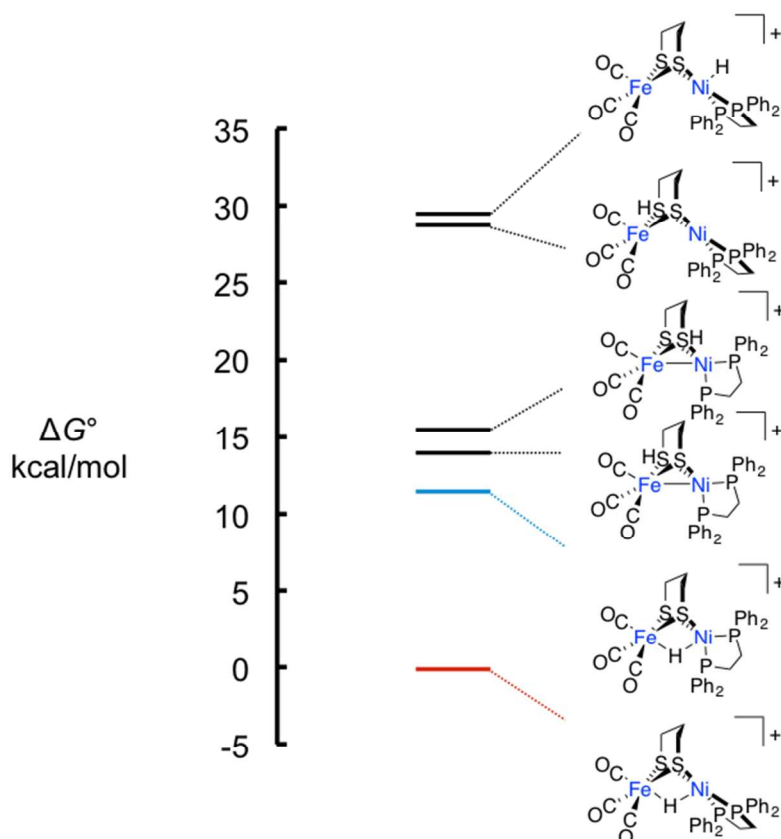

**Figure S57.** Isomeric forms of  $[1H]^+$  and their free energies relative to the square-planar  $\mu$ -hydride (red line). Note the high energy of the twisted Ni form ( $\sim 11$  kcal/mol, blue line). Even higher in energy are species in which  $H^+$  has attacked S ( $\sim 15 - 27$  kcal/mol) or Ni ( $\sim 30$  kcal/mol). Despite their relative instabilities, these tautomers (in particular the S-protonated species) cannot be ruled out as intermediates in  $[1H]^+$ -catalyzed  $H^+$  reduction. This is of relevance to the  $[NiFe]$ - $H_2$ ase catalytic cycle, in which some redox states feature protonated (terminal) Cys residues bonded to Ni.

**Table S9.** Calculated Free Energy Barriers ( $\Delta G^\ddagger$ ) and Imaginary Frequencies of Transition States for Tetrahedral to Square Planar Rotation at the Ni(dppe) Site in  $(CO)_3Fe(pdt)Ni(dppe)$

|                 | $\Delta G^\ddagger$ <sup>a</sup> | $\nu$ <sup>b</sup> |
|-----------------|----------------------------------|--------------------|
| TS <sup>c</sup> | 6.66                             | -13                |
| TS1             | 4.79                             | -23                |
| TS2             | 4.06                             | -52                |
| TS3             | 3.18                             | -33                |

<sup>a</sup>Values given in kcal/mol relative to the tetrahedral geometry at 298.15 K. <sup>b</sup>Values given in  $cm^{-1}$ , where the negative sign indicates a negative force constant or imaginary frequency. <sup>c</sup>The potential energy surface was found to be extremely flat along the isomerization pathway. As a result, the single imaginary frequencies for the TSs are very small. Each TS was verified to lead to the relevant tetrahedral and square planar geometries by following the intrinsic reaction coordinate (IRC) for 4 or 5 steps in both directions and subsequently optimizing the geometries. As the imaginary frequencies may be below the numerical accuracy of the methodology, and the complete IRC was not obtained, the free energy barriers should be viewed with caution. Moreover, the observation of multiple TSs suggests a ruffled potential energy surface connecting the two isomers. Only the highest free energy barrier is reported in the main text.

In the following tables are the Cartesian coordinates of all species studied herein. The geometries were optimized in the gas phase using the B3P86 functional. The SDD pseudopotential and associated basis set were used for the Fe, Ni, Pd, and Pt centers, the 6-31G\*\* basis set was used for the  $\mu$ -H, and the 6-31G\* basis set was used for all other atoms.

**Table S10.** Cartesian Coordinates of the Optimized Structure of  $(\text{OC})_3\text{Fe}(\text{pdt})\text{Ni}(\text{dppe})$  in Tetrahedral Geometry (**1**,  $-3243.63774874 E_h$ ).

| atom | x         | y         | z         |
|------|-----------|-----------|-----------|
| Ni   | 8.847687  | 10.159493 | 2.956441  |
| Fe   | 6.811047  | 11.448540 | 3.150529  |
| P    | 9.873822  | 10.726983 | 4.768762  |
| S    | 8.287077  | 11.847037 | 1.434691  |
| O    | 5.618119  | 10.553429 | 5.674070  |
| C    | 11.233549 | 9.462947  | 5.015494  |
| H    | 11.998572 | 9.845556  | 5.699808  |
| H    | 10.786082 | 8.575265  | 5.475655  |
| P    | 10.428130 | 8.758622  | 2.469669  |
| S    | 6.814672  | 9.236791  | 2.608478  |
| C    | 11.816904 | 9.127506  | 3.647629  |
| H    | 12.555146 | 8.318421  | 3.685126  |
| H    | 12.326340 | 10.003656 | 3.228324  |
| O    | 7.645944  | 14.023923 | 4.265177  |
| O    | 4.384647  | 12.289245 | 1.771591  |
| C    | 7.611007  | 11.143346 | -0.116273 |
| H    | 6.648811  | 11.628292 | -0.316916 |
| H    | 8.302058  | 11.463664 | -0.903973 |
| C    | 7.470826  | 9.631258  | -0.154382 |
| H    | 8.452877  | 9.177562  | 0.026233  |
| H    | 7.169030  | 9.341802  | -1.172587 |
| C    | 6.454036  | 9.054554  | 0.815604  |
| H    | 6.360111  | 7.974582  | 0.651988  |
| H    | 5.462488  | 9.486806  | 0.639529  |
| C    | 6.114081  | 10.906079 | 4.697399  |
| C    | 7.335754  | 13.004232 | 3.824793  |
| C    | 5.338715  | 11.968354 | 2.335833  |
| C    | 10.875263 | 12.273307 | 4.792626  |
| C    | 10.909057 | 13.086014 | 3.656181  |
| H    | 10.300240 | 12.825258 | 2.794403  |
| C    | 11.717411 | 14.222055 | 3.622433  |
| H    | 11.728500 | 14.846504 | 2.733612  |
| C    | 12.500015 | 14.555799 | 4.723113  |

|   |           |           |           |
|---|-----------|-----------|-----------|
| H | 13.128047 | 15.442098 | 4.697873  |
| C | 12.475504 | 13.750366 | 5.861912  |
| H | 13.083429 | 14.007256 | 6.725167  |
| C | 11.670781 | 12.616705 | 5.895788  |
| H | 11.650190 | 12.002378 | 6.792650  |
| C | 9.042581  | 10.714477 | 6.406956  |
| C | 8.758741  | 11.891012 | 7.110490  |
| H | 9.077337  | 12.850512 | 6.714895  |
| C | 8.065991  | 11.842536 | 8.318291  |
| H | 7.853991  | 12.765544 | 8.850898  |
| C | 7.647346  | 10.621783 | 8.840176  |
| H | 7.108373  | 10.586023 | 9.782600  |
| C | 7.910273  | 9.447018  | 8.138699  |
| H | 7.571630  | 8.491008  | 8.528063  |
| C | 8.593670  | 9.493619  | 6.928179  |
| H | 8.755201  | 8.571777  | 6.374780  |
| C | 11.289022 | 8.788837  | 0.845562  |
| C | 11.960129 | 7.673423  | 0.330734  |
| H | 11.938197 | 6.730456  | 0.869801  |
| C | 12.650897 | 7.764500  | -0.874891 |
| H | 13.165143 | 6.891738  | -1.268012 |
| C | 12.682742 | 8.968926  | -1.574863 |
| H | 13.221168 | 9.036875  | -2.516136 |
| C | 12.017299 | 10.083321 | -1.068495 |
| H | 12.034016 | 11.023325 | -1.613198 |
| C | 11.317996 | 9.993224  | 0.132375  |
| H | 10.774897 | 10.852157 | 0.521713  |
| C | 10.067551 | 6.973898  | 2.716228  |
| C | 10.729370 | 6.177122  | 3.656541  |
| H | 11.516937 | 6.593924  | 4.276566  |
| C | 10.389201 | 4.834083  | 3.816652  |
| H | 10.911380 | 4.232697  | 4.555717  |
| C | 9.390129  | 4.266775  | 3.032513  |
| H | 9.125856  | 3.220538  | 3.156948  |
| C | 8.726654  | 5.049932  | 2.088646  |
| H | 7.942932  | 4.616263  | 1.473986  |
| C | 9.056789  | 6.391537  | 1.939066  |
| H | 8.523518  | 6.998530  | 1.213197  |

---

**Table S11.** Cartesian Coordinates of the Optimized Structure of (OC)<sub>3</sub>Fe(pdt)Ni(dppe) in Square Planar Geometry (**1**,  $-3243.62931132 E_h$ ).

| atom | x         | y         | z         |
|------|-----------|-----------|-----------|
| Ni   | 11.771907 | 8.828739  | 14.674505 |
| Fe   | 10.494872 | 9.632165  | 12.624243 |
| S    | 12.279380 | 8.172914  | 12.645290 |
| S    | 9.635970  | 8.229166  | 14.328885 |
| P    | 13.867523 | 9.006801  | 15.268319 |
| P    | 11.225085 | 9.970070  | 16.448227 |
| O    | 8.129190  | 11.285588 | 12.987394 |
| O    | 9.779559  | 8.944817  | 9.889227  |
| O    | 12.225289 | 11.983574 | 12.688701 |
| C    | 14.995089 | 9.887248  | 14.128952 |
| C    | 15.242305 | 11.257973 | 14.261942 |
| H    | 14.789020 | 11.824970 | 15.069320 |
| C    | 16.064127 | 11.919997 | 13.354465 |
| H    | 16.243794 | 12.984815 | 13.470358 |
| C    | 16.645075 | 11.221536 | 12.299801 |
| H    | 17.283154 | 11.739335 | 11.589473 |
| C    | 16.400254 | 9.857838  | 12.155113 |
| H    | 16.846331 | 9.307291  | 11.331917 |
| C    | 15.578951 | 9.193405  | 13.060207 |
| H    | 15.392784 | 8.131453  | 12.938814 |
| C    | 14.795886 | 7.483202  | 15.686926 |
| C    | 16.177745 | 7.504491  | 15.915596 |
| H    | 16.735828 | 8.427618  | 15.784383 |
| C    | 16.842843 | 6.342378  | 16.293711 |
| H    | 17.915101 | 6.366697  | 16.466961 |
| C    | 16.136946 | 5.149253  | 16.445001 |
| H    | 16.659711 | 4.242520  | 16.736286 |
| C    | 14.763812 | 5.119957  | 16.216755 |
| H    | 14.211498 | 4.191012  | 16.327491 |
| C    | 14.096578 | 6.282924  | 15.837881 |
| H    | 13.026125 | 6.271847  | 15.648588 |
| C    | 10.887965 | 8.977581  | 17.954495 |
| C    | 10.725605 | 7.593445  | 17.848761 |
| H    | 10.759798 | 7.137796  | 16.862891 |
| C    | 10.504087 | 6.820490  | 18.987416 |
| H    | 10.376195 | 5.745782  | 18.893273 |
| C    | 10.442934 | 7.424378  | 20.239921 |
| H    | 10.271427 | 6.822026  | 21.127670 |
| C    | 10.595836 | 8.806030  | 20.354425 |

|   |           |           |           |
|---|-----------|-----------|-----------|
| H | 10.540123 | 9.282195  | 21.329320 |
| C | 10.814916 | 9.578850  | 19.218896 |
| H | 10.911695 | 10.657099 | 19.317743 |
| C | 9.889353  | 11.212079 | 16.411229 |
| C | 10.074607 | 12.399959 | 15.690569 |
| H | 10.995015 | 12.572931 | 15.140368 |
| C | 9.063381  | 13.352173 | 15.639078 |
| H | 9.217354  | 14.267656 | 15.075663 |
| C | 7.851164  | 13.123078 | 16.287975 |
| H | 7.059032  | 13.864536 | 16.237304 |
| C | 7.652386  | 11.935649 | 16.985337 |
| H | 6.704312  | 11.744196 | 17.479695 |
| C | 8.666043  | 10.982395 | 17.049686 |
| H | 8.502947  | 10.059104 | 17.596123 |
| C | 11.659108 | 6.486793  | 12.267666 |
| H | 11.134304 | 6.562309  | 11.308561 |
| H | 12.551338 | 5.870673  | 12.112525 |
| C | 10.764162 | 5.837277  | 13.309233 |
| H | 10.530085 | 4.819264  | 12.962654 |
| H | 11.315600 | 5.734321  | 14.252716 |
| C | 9.460757  | 6.570856  | 13.569507 |
| H | 8.844618  | 5.985482  | 14.261849 |
| H | 8.898047  | 6.694466  | 12.637349 |
| C | 9.083884  | 10.644900 | 12.857115 |
| C | 10.026047 | 9.176997  | 11.001409 |
| C | 11.579542 | 11.011725 | 12.714878 |
| C | 13.935609 | 9.981361  | 16.857065 |
| H | 13.882368 | 9.243912  | 17.666053 |
| H | 14.891385 | 10.507231 | 16.956139 |
| C | 12.740197 | 10.927512 | 16.935598 |
| H | 12.839187 | 11.752352 | 16.221628 |
| H | 12.633753 | 11.363317 | 17.934828 |

---

**Table S12.** Cartesian Coordinates of the Optimized Structure of (OC)<sub>3</sub>Fe(pdt)Ni(dppe) Transition State (**1**, -3243.62855419 *E<sub>h</sub>*).

| atom | x         | y         | z         |
|------|-----------|-----------|-----------|
| Ni   | -0.192720 | 0.214282  | -0.321409 |
| Fe   | -2.499788 | 0.903913  | 0.081258  |
| S    | -0.985012 | 2.155929  | -1.028222 |
| S    | -2.028064 | -0.833463 | -1.408868 |
| P    | 1.944031  | 0.564200  | -0.541729 |
| P    | 0.248716  | -1.152352 | 1.326836  |
| O    | -4.017273 | -1.086063 | 1.590026  |
| O    | -4.843105 | 2.276285  | -0.969305 |
| O    | -1.733089 | 2.477054  | 2.428853  |
| C    | 2.436279  | 2.326417  | -0.390999 |
| C    | 3.155435  | 3.015741  | -1.374494 |
| H    | 3.455074  | 2.509564  | -2.291441 |
| C    | 3.464589  | 4.364667  | -1.206364 |
| H    | 4.003993  | 4.889867  | -1.993415 |
| C    | 3.059880  | 5.040007  | -0.057143 |
| H    | 3.293562  | 6.093915  | 0.063016  |
| C    | 2.330273  | 4.364286  | 0.923424  |
| H    | 2.006341  | 4.882888  | 1.826434  |
| C    | 2.013954  | 3.021054  | 0.754396  |
| H    | 1.418977  | 2.511729  | 1.515816  |
| C    | 2.928805  | -0.084094 | -1.949198 |
| C    | 2.278030  | -0.817209 | -2.948012 |
| H    | 1.213428  | -0.945979 | -2.876695 |
| C    | 2.993926  | -1.382694 | -4.005282 |
| H    | 2.490145  | -1.903297 | -4.779613 |
| C    | 4.373949  | -1.209848 | -4.071912 |
| H    | 4.930402  | -1.641046 | -4.901529 |
| C    | 5.039931  | -0.483233 | -3.072211 |
| H    | 6.122951  | -0.324160 | -3.126939 |
| C    | 4.325000  | 0.072730  | -2.013621 |
| H    | 4.860511  | 0.690705  | -1.252790 |
| C    | 0.766203  | -2.849781 | 0.833512  |
| C    | 1.415445  | -3.703136 | 1.738033  |
| H    | 1.581873  | -3.386561 | 2.764885  |
| C    | 1.841385  | -4.964405 | 1.336161  |
| H    | 2.349793  | -5.614203 | 2.043431  |
| C    | 1.615805  | -5.393579 | 0.027569  |
| H    | 1.939626  | -6.383267 | -0.283138 |
| C    | 0.961045  | -4.558626 | -0.872714 |



## S41

|   |           |           |           |
|---|-----------|-----------|-----------|
| H | 0.758175  | -4.898741 | -1.885393 |
| C | 0.540261  | -3.290125 | -0.473722 |
| H | 0.007264  | -2.639075 | -1.162790 |
| C | -0.773827 | -1.465085 | 2.817037  |
| C | -0.889133 | -0.479754 | 3.806960  |
| H | -0.379699 | 0.472645  | 3.696552  |
| C | -1.678978 | -0.696462 | 4.931158  |
| H | -1.755196 | 0.077408  | 5.689817  |
| C | -2.374528 | -1.895289 | 5.078867  |
| H | -2.991434 | -2.062543 | 5.957258  |
| C | -2.277770 | -2.873459 | 4.093786  |
| H | -2.820182 | -3.808850 | 4.198608  |
| C | -1.482971 | -2.662025 | 2.969998  |
| H | -1.412124 | -3.436067 | 2.212288  |
| C | -1.373595 | 2.182320  | -2.821260 |
| H | -2.372130 | 2.626738  | -2.911113 |
| H | -0.660622 | 2.897192  | -3.247612 |
| C | -1.290990 | 0.861234  | -3.562548 |
| H | -1.450822 | 1.067019  | -4.632507 |
| H | -0.267274 | 0.474782  | -3.464951 |
| C | -2.283903 | -0.197462 | -3.107228 |
| H | -2.190004 | -1.070840 | -3.765038 |
| H | -3.311675 | 0.175463  | -3.197366 |
| C | -3.389626 | -0.310613 | 1.012570  |
| C | -3.926306 | 1.700613  | -0.562817 |
| C | -2.026139 | 1.836876  | 1.509226  |
| C | 2.815969  | -0.247826 | 0.909819  |
| H | 3.209770  | -1.202669 | 0.544531  |
| H | 3.664804  | 0.363694  | 1.233548  |
| C | 1.833788  | -0.494813 | 2.049635  |
| H | 2.246194  | -1.188013 | 2.791316  |
| H | 1.594302  | 0.438170  | 2.570323  |

---

**Table S13.** Cartesian Coordinates of the Optimized Structure of  $[(OC)_3Fe(pdt)Ni(dppe)]^+$  ( $[1]^+$ ,  $-3243.44266981 E_h$ ).

| atom | x         | y         | z         |
|------|-----------|-----------|-----------|
| Ni   | 11.771907 | 8.828739  | 14.674505 |
| Fe   | 10.494872 | 9.632165  | 12.624243 |
| S    | 12.279380 | 8.172914  | 12.645290 |
| S    | 9.635970  | 8.229166  | 14.328885 |
| P    | 13.867523 | 9.006801  | 15.268319 |
| P    | 11.225085 | 9.970070  | 16.448227 |
| O    | 8.129190  | 11.285588 | 12.987394 |
| O    | 9.779559  | 8.944817  | 9.889227  |
| O    | 12.225289 | 11.983574 | 12.688701 |
| C    | 14.995089 | 9.887248  | 14.128952 |
| C    | 15.242305 | 11.257973 | 14.261942 |
| H    | 14.789020 | 11.824970 | 15.069320 |
| C    | 16.064127 | 11.919997 | 13.354465 |
| H    | 16.243794 | 12.984815 | 13.470358 |
| C    | 16.645075 | 11.221536 | 12.299801 |
| H    | 17.283154 | 11.739335 | 11.589473 |
| C    | 16.400254 | 9.857838  | 12.155113 |
| H    | 16.846331 | 9.307291  | 11.331917 |
| C    | 15.578951 | 9.193405  | 13.060207 |
| H    | 15.392784 | 8.131453  | 12.938814 |
| C    | 14.795886 | 7.483202  | 15.686926 |
| C    | 16.177745 | 7.504491  | 15.915596 |
| H    | 16.735828 | 8.427618  | 15.784383 |
| C    | 16.842843 | 6.342378  | 16.293711 |
| H    | 17.915101 | 6.366697  | 16.466961 |
| C    | 16.136946 | 5.149253  | 16.445001 |
| H    | 16.659711 | 4.242520  | 16.736286 |
| C    | 14.763812 | 5.119957  | 16.216755 |
| H    | 14.211498 | 4.191012  | 16.327491 |
| C    | 14.096578 | 6.282924  | 15.837881 |
| H    | 13.026125 | 6.271847  | 15.648588 |
| C    | 10.887965 | 8.977581  | 17.954495 |
| C    | 10.725605 | 7.593445  | 17.848761 |
| H    | 10.759798 | 7.137796  | 16.862891 |
| C    | 10.504087 | 6.820490  | 18.987416 |
| H    | 10.376195 | 5.745782  | 18.893273 |
| C    | 10.442934 | 7.424378  | 20.239921 |
| H    | 10.271427 | 6.822026  | 21.127670 |
| C    | 10.595836 | 8.806030  | 20.354425 |

|   |           |           |           |
|---|-----------|-----------|-----------|
| H | 10.540123 | 9.282195  | 21.329320 |
| C | 10.814916 | 9.578850  | 19.218896 |
| H | 10.911695 | 10.657099 | 19.317743 |
| C | 9.889353  | 11.212079 | 16.411229 |
| C | 10.074607 | 12.399959 | 15.690569 |
| H | 10.995015 | 12.572931 | 15.140368 |
| C | 9.063381  | 13.352173 | 15.639078 |
| H | 9.217354  | 14.267656 | 15.075663 |
| C | 7.851164  | 13.123078 | 16.287975 |
| H | 7.059032  | 13.864536 | 16.237304 |
| C | 7.652386  | 11.935649 | 16.985337 |
| H | 6.704312  | 11.744196 | 17.479695 |
| C | 8.666043  | 10.982395 | 17.049686 |
| H | 8.502947  | 10.059104 | 17.596123 |
| C | 11.659108 | 6.486793  | 12.267666 |
| H | 11.134304 | 6.562309  | 11.308561 |
| H | 12.551338 | 5.870673  | 12.112525 |
| C | 10.764162 | 5.837277  | 13.309233 |
| H | 10.530085 | 4.819264  | 12.962654 |
| H | 11.315600 | 5.734321  | 14.252716 |
| C | 9.460757  | 6.570856  | 13.569507 |
| H | 8.844618  | 5.985482  | 14.261849 |
| H | 8.898047  | 6.694466  | 12.637349 |
| C | 9.083884  | 10.644900 | 12.857115 |
| C | 10.026047 | 9.176997  | 11.001409 |
| C | 11.579542 | 11.011725 | 12.714878 |
| C | 13.935609 | 9.981361  | 16.857065 |
| H | 13.882368 | 9.243912  | 17.666053 |
| H | 14.891385 | 10.507231 | 16.956139 |
| C | 12.740197 | 10.927512 | 16.935598 |
| H | 12.839187 | 11.752352 | 16.221628 |
| H | 12.633753 | 11.363317 | 17.934828 |

---

**Table S14.** Cartesian Coordinates of the Optimized Structure of  $[(OC)_3Fe(pdt)Ni(dppe)]^{2+}$  ( $[1]^{2+}$ ,  $-3243.09204890 E_h$ ).

| atom | x         | y         | z         |
|------|-----------|-----------|-----------|
| Ni   | 11.852384 | 8.688197  | 14.881823 |
| Fe   | 10.636173 | 9.283715  | 12.642104 |
| S    | 12.320934 | 7.811054  | 12.859634 |
| S    | 9.666981  | 8.313423  | 14.413524 |
| P    | 13.997513 | 9.009863  | 15.416213 |
| P    | 11.322068 | 9.875076  | 16.676056 |
| O    | 8.609106  | 11.459123 | 12.852209 |
| O    | 9.222800  | 7.860138  | 10.538905 |
| O    | 12.350212 | 10.896349 | 10.817829 |
| C    | 14.829733 | 10.269627 | 14.409011 |
| C    | 15.280183 | 11.471871 | 14.974354 |
| H    | 15.158929 | 11.674841 | 16.033212 |
| C    | 15.925070 | 12.419525 | 14.183833 |
| H    | 16.279690 | 13.341182 | 14.634498 |
| C    | 16.129766 | 12.178858 | 12.827376 |
| H    | 16.639876 | 12.916547 | 12.215878 |
| C    | 15.692036 | 10.983118 | 12.258804 |
| H    | 15.867343 | 10.784323 | 11.206041 |
| C    | 15.040481 | 10.033984 | 13.039484 |
| H    | 14.726234 | 9.097279  | 12.588705 |
| C    | 14.959394 | 7.476708  | 15.371777 |
| C    | 16.220086 | 7.400002  | 14.768310 |
| H    | 16.653628 | 8.268627  | 14.283457 |
| C    | 16.930114 | 6.202275  | 14.804924 |
| H    | 17.911134 | 6.147259  | 14.343660 |
| C    | 16.391340 | 5.083776  | 15.436859 |
| H    | 16.952257 | 4.154814  | 15.465032 |
| C    | 15.136104 | 5.156527  | 16.042298 |
| H    | 14.723068 | 4.288195  | 16.546345 |
| C    | 14.419382 | 6.347036  | 16.008300 |
| H    | 13.448564 | 6.402937  | 16.498743 |
| C    | 10.582223 | 8.896199  | 18.006557 |
| C    | 10.500907 | 7.502700  | 17.896970 |
| H    | 10.833363 | 7.011149  | 16.985101 |
| C    | 9.996646  | 6.744408  | 18.950115 |
| H    | 9.936716  | 5.663909  | 18.863417 |
| C    | 9.568263  | 7.376014  | 20.115605 |
| H    | 9.172649  | 6.786384  | 20.936675 |
| C    | 9.645894  | 8.764156  | 20.231610 |

|   |           |           |           |
|---|-----------|-----------|-----------|
| H | 9.310256  | 9.254421  | 21.139998 |
| C | 10.153695 | 9.526292  | 19.184962 |
| H | 10.203823 | 10.607565 | 19.284526 |
| C | 10.230559 | 11.266074 | 16.276505 |
| C | 10.757335 | 12.392586 | 15.620282 |
| H | 11.812890 | 12.448112 | 15.365849 |
| C | 9.928894  | 13.464002 | 15.303263 |
| H | 10.343852 | 14.341095 | 14.816311 |
| C | 8.571420  | 13.415368 | 15.620913 |
| H | 7.928499  | 14.256292 | 15.380259 |
| C | 8.039972  | 12.290617 | 16.250451 |
| H | 6.984006  | 12.253517 | 16.499183 |
| C | 8.861524  | 11.214709 | 16.575936 |
| H | 8.442151  | 10.348899 | 17.078733 |
| C | 11.738487 | 6.066982  | 12.954685 |
| H | 11.243150 | 5.856863  | 12.001014 |
| H | 12.661177 | 5.480341  | 12.979731 |
| C | 10.860677 | 5.716641  | 14.140563 |
| H | 10.612803 | 4.648926  | 14.065638 |
| H | 11.436770 | 5.833417  | 15.066761 |
| C | 9.554086  | 6.481625  | 14.235353 |
| H | 8.990044  | 6.164535  | 15.117464 |
| H | 8.915735  | 6.302450  | 13.363834 |
| C | 9.405128  | 10.649564 | 12.802900 |
| C | 9.771641  | 8.457729  | 11.340374 |
| C | 11.705457 | 10.281898 | 11.524619 |
| C | 14.007998 | 9.593437  | 17.169304 |
| H | 13.862079 | 8.698493  | 17.785668 |
| H | 14.988777 | 10.000787 | 17.437233 |
| C | 12.876303 | 10.590902 | 17.385640 |
| H | 13.077724 | 11.543700 | 16.887397 |
| H | 12.721745 | 10.802757 | 18.448750 |

---

**Table S15.** Cartesian Coordinates of the Optimized Structure of  $[(OC)_3FeH(pdt)Ni(dppe)]^+$  in Square Planar Geometry ( $[1H]^+$ ,  $-3244.06263786 E_h$ ).

| atom | x         | y         | z         |
|------|-----------|-----------|-----------|
| Ni   | 8.783654  | 10.028306 | 2.863227  |
| Fe   | 6.508034  | 10.917070 | 3.148014  |
| S    | 7.873013  | 11.419506 | 1.411648  |
| S    | 6.893654  | 8.655974  | 2.695546  |
| P    | 10.856432 | 9.789358  | 2.274304  |
| P    | 9.373793  | 9.662305  | 4.928506  |
| O    | 7.031578  | 13.615650 | 4.152528  |
| O    | 3.976136  | 11.275722 | 1.752155  |
| O    | 5.281309  | 10.046259 | 5.654561  |
| C    | 11.865046 | 11.212898 | 1.701478  |
| C    | 11.303043 | 12.489978 | 1.624685  |
| H    | 10.248589 | 12.621295 | 1.846944  |
| C    | 12.083867 | 13.581187 | 1.244864  |
| H    | 11.633596 | 14.567866 | 1.182673  |
| C    | 13.431113 | 13.406151 | 0.944005  |
| H    | 14.038943 | 14.257072 | 0.649012  |
| C    | 14.000335 | 12.134784 | 1.017403  |
| H    | 15.051104 | 11.992729 | 0.780134  |
| C    | 13.222386 | 11.044446 | 1.391346  |
| H    | 13.670169 | 10.054666 | 1.431939  |
| C    | 11.207570 | 8.522592  | 0.988527  |
| C    | 11.246810 | 7.163417  | 1.324269  |
| H    | 11.129280 | 6.853577  | 2.359369  |
| C    | 11.426548 | 6.193706  | 0.342275  |
| H    | 11.461042 | 5.144416  | 0.622212  |
| C    | 11.559488 | 6.566506  | -0.993697 |
| H    | 11.698009 | 5.809696  | -1.760475 |
| C    | 11.512819 | 7.914903  | -1.340005 |
| H    | 11.617070 | 8.214902  | -2.379115 |
| C    | 11.337628 | 8.886333  | -0.357829 |
| H    | 11.312914 | 9.935719  | -0.638220 |
| C    | 8.354747  | 8.704443  | 6.111618  |
| C    | 7.986794  | 7.397168  | 5.762143  |
| H    | 8.289743  | 6.985052  | 4.804145  |
| C    | 7.205182  | 6.630468  | 6.620337  |
| H    | 6.926600  | 5.620304  | 6.333940  |
| C    | 6.772217  | 7.159438  | 7.834124  |
| H    | 6.159504  | 6.561034  | 8.502439  |
| C    | 7.116751  | 8.462932  | 8.180367  |

|    |           |           |           |
|----|-----------|-----------|-----------|
| H  | 6.770049  | 8.888770  | 9.117721  |
| C  | 7.899661  | 9.233124  | 7.324574  |
| H  | 8.151080  | 10.251754 | 7.602420  |
| C  | 10.053599 | 11.058556 | 5.913232  |
| C  | 9.989939  | 12.353043 | 5.392348  |
| H  | 9.496958  | 12.510583 | 4.438238  |
| C  | 10.550897 | 13.425532 | 6.084234  |
| H  | 10.487135 | 14.426528 | 5.667803  |
| C  | 11.185492 | 13.211544 | 7.303778  |
| H  | 11.622397 | 14.046052 | 7.845210  |
| C  | 11.260155 | 11.922328 | 7.831632  |
| H  | 11.754557 | 11.750676 | 8.783864  |
| C  | 10.700267 | 10.852635 | 7.141061  |
| H  | 10.753944 | 9.854522  | 7.568410  |
| C  | 7.347904  | 10.524574 | -0.107683 |
| H  | 6.336132  | 10.875981 | -0.340772 |
| H  | 8.009956  | 10.896776 | -0.897036 |
| C  | 7.398340  | 9.007195  | -0.067839 |
| H  | 7.132450  | 8.641494  | -1.071534 |
| H  | 8.425697  | 8.680055  | 0.130240  |
| C  | 6.464355  | 8.361890  | 0.942298  |
| H  | 6.493886  | 7.273406  | 0.817710  |
| H  | 5.428543  | 8.679948  | 0.774519  |
| C  | 5.810259  | 10.374161 | 4.684373  |
| C  | 4.972214  | 11.123426 | 2.317094  |
| C  | 6.851447  | 12.539128 | 3.771476  |
| C  | 11.828041 | 9.201195  | 3.760238  |
| H  | 12.623547 | 8.513064  | 3.454527  |
| H  | 12.306048 | 10.092385 | 4.182060  |
| C  | 10.890178 | 8.581124  | 4.789009  |
| H  | 10.541800 | 7.593674  | 4.466229  |
| H  | 11.382505 | 8.458393  | 5.760124  |
| Ni | 8.783654  | 10.028306 | 2.863227  |

---

**Table S16.** Cartesian Coordinates of the Optimized Structure of  $[(\text{OC})_3\text{FeH}(\text{pdt})\text{Ni}(\text{dppe})]^+$  in Tetrahedral Geometry ( $[\text{1H}]^+$ ,  $-3244.04345183 E_h$ ).

| atom | x         | y         | z         |
|------|-----------|-----------|-----------|
| Ni   | 11.827170 | 9.006419  | 14.641203 |
| Fe   | 10.561795 | 9.145075  | 12.443890 |
| H    | 11.141137 | 10.097806 | 13.604115 |
| S    | 12.779336 | 8.411936  | 12.415058 |
| S    | 10.194505 | 7.622578  | 14.128212 |
| P    | 12.300885 | 8.275118  | 16.640506 |
| P    | 12.759428 | 10.897652 | 15.213863 |
| O    | 8.179873  | 10.675389 | 13.218181 |
| O    | 8.937312  | 7.438715  | 10.691307 |
| O    | 11.566774 | 11.067552 | 10.459587 |
| C    | 13.232191 | 6.705859  | 16.630779 |
| C    | 14.585494 | 6.701181  | 16.267687 |
| H    | 15.095507 | 7.630803  | 16.029590 |
| C    | 15.290938 | 5.503754  | 16.203395 |
| H    | 16.341671 | 5.511164  | 15.929606 |
| C    | 14.650487 | 4.299684  | 16.492204 |
| H    | 15.202210 | 3.365857  | 16.443040 |
| C    | 13.303895 | 4.296710  | 16.849141 |
| H    | 12.803866 | 3.361455  | 17.082539 |
| C    | 12.594049 | 5.492983  | 16.917850 |
| H    | 11.548003 | 5.483271  | 17.209671 |
| C    | 10.972841 | 8.027475  | 17.863917 |
| C    | 11.311939 | 7.608851  | 19.160068 |
| H    | 12.344482 | 7.380525  | 19.411208 |
| C    | 10.325183 | 7.469161  | 20.129273 |
| H    | 10.594839 | 7.143468  | 21.129354 |
| C    | 8.993841  | 7.742525  | 19.815590 |
| H    | 8.224499  | 7.629371  | 20.573487 |
| C    | 8.651347  | 8.156221  | 18.531696 |
| H    | 7.614918  | 8.363881  | 18.283426 |
| C    | 9.637019  | 8.301463  | 17.557356 |
| H    | 9.365677  | 8.612558  | 16.554455 |
| C    | 11.662558 | 12.047552 | 16.100899 |
| C    | 10.286741 | 11.806921 | 16.167027 |
| H    | 9.872590  | 10.930830 | 15.677455 |
| C    | 9.452175  | 12.682792 | 16.857852 |
| H    | 8.384675  | 12.490016 | 16.901123 |
| C    | 9.988139  | 13.801440 | 17.489388 |
| H    | 9.338351  | 14.484026 | 18.028697 |



|   |           |           |           |
|---|-----------|-----------|-----------|
| C | 11.359730 | 14.049108 | 17.428622 |
| H | 11.778238 | 14.923550 | 17.917582 |
| C | 12.195411 | 13.178872 | 16.737559 |
| H | 13.259643 | 13.392539 | 16.681003 |
| C | 13.590172 | 11.859007 | 13.913972 |
| C | 14.697317 | 11.296326 | 13.262346 |
| H | 15.052293 | 10.306740 | 13.535277 |
| C | 15.335798 | 11.993871 | 12.242780 |
| H | 16.194628 | 11.553332 | 11.745881 |
| C | 14.867868 | 13.247942 | 11.854131 |
| H | 15.365746 | 13.789135 | 11.055322 |
| C | 13.757802 | 13.803617 | 12.485556 |
| H | 13.387871 | 14.778081 | 12.181515 |
| C | 13.117268 | 13.114328 | 13.511871 |
| H | 12.255722 | 13.557715 | 14.001264 |
| C | 12.724305 | 6.618278  | 12.073431 |
| H | 12.141899 | 6.453447  | 11.160176 |
| H | 13.759107 | 6.338193  | 11.849579 |
| C | 12.212983 | 5.768170  | 13.222399 |
| H | 12.339392 | 4.709692  | 12.953522 |
| H | 12.833263 | 5.944829  | 14.106323 |
| C | 10.749002 | 5.955782  | 13.578544 |
| H | 10.482632 | 5.298692  | 14.412122 |
| H | 10.097803 | 5.687596  | 12.738908 |
| C | 9.092211  | 10.064718 | 12.892996 |
| C | 9.631438  | 8.091993  | 11.326649 |
| C | 11.168725 | 10.328844 | 11.235823 |
| C | 13.430710 | 9.512938  | 17.470515 |
| H | 12.796915 | 10.077818 | 18.162221 |
| H | 14.184260 | 8.987683  | 18.065824 |
| C | 14.061856 | 10.454628 | 16.450236 |
| H | 14.874992 | 9.969641  | 15.899434 |
| H | 14.475262 | 11.348796 | 16.928445 |

---

**Table S17.** Cartesian Coordinates of the Optimized Structure of (OC)<sub>3</sub>Fe(pdt)Pd(dppe) in Tetrahedral Geometry (**2**, -3200.63063206 *E<sub>h</sub>*).

| atom | x         | y         | z         |
|------|-----------|-----------|-----------|
| Pd   | 11.760100 | 8.959800  | 14.585700 |
| Fe   | 10.734400 | 9.333100  | 12.291000 |
| P    | 11.739700 | 11.003200 | 15.608000 |
| P    | 12.809600 | 8.122000  | 16.459300 |
| S    | 9.284900  | 8.219700  | 13.721900 |
| S    | 12.339400 | 7.752100  | 12.581300 |
| O    | 9.007700  | 11.635700 | 12.820200 |
| O    | 9.525200  | 8.386100  | 9.814300  |
| O    | 12.927500 | 10.998200 | 11.277000 |
| C    | 12.351000 | 12.506900 | 14.757100 |
| C    | 13.691200 | 12.553000 | 14.348300 |
| H    | 14.353600 | 11.716700 | 14.557600 |
| C    | 14.180800 | 13.650500 | 13.649200 |
| H    | 15.223000 | 13.671400 | 13.343100 |
| C    | 13.334800 | 14.710700 | 13.328200 |
| H    | 13.715900 | 15.564800 | 12.775700 |
| C    | 11.996300 | 14.662200 | 13.707100 |
| H    | 11.326100 | 15.477700 | 13.449700 |
| C    | 11.504500 | 13.568900 | 14.417100 |
| H    | 10.457800 | 13.542600 | 14.702700 |
| C    | 10.215100 | 11.549800 | 16.473200 |
| C    | 10.203700 | 12.690000 | 17.290300 |
| H    | 11.094700 | 13.307000 | 17.377200 |
| C    | 9.050700  | 13.052800 | 17.978000 |
| H    | 9.052400  | 13.939800 | 18.605500 |
| C    | 7.894400  | 12.281000 | 17.859000 |
| H    | 6.993700  | 12.566700 | 18.395300 |
| C    | 7.896600  | 11.149100 | 17.050000 |
| H    | 6.997900  | 10.547600 | 16.947200 |
| C    | 9.052000  | 10.782700 | 16.359600 |
| H    | 9.052900  | 9.897200  | 15.727900 |
| C    | 12.922500 | 10.832600 | 17.044600 |
| H    | 13.942100 | 10.902700 | 16.649100 |
| H    | 12.782900 | 11.659300 | 17.749900 |
| C    | 12.710700 | 9.484600  | 17.726700 |
| H    | 11.709500 | 9.435300  | 18.171300 |
| H    | 13.436400 | 9.328300  | 18.532200 |
| C    | 12.122500 | 6.675200  | 17.352300 |
| C    | 10.764600 | 6.716700  | 17.702100 |

|   |           |           |           |
|---|-----------|-----------|-----------|
| H | 10.165900 | 7.586800  | 17.441300 |
| C | 10.169100 | 5.642000  | 18.352600 |
| H | 9.117800  | 5.691700  | 18.622100 |
| C | 10.914000 | 4.499200  | 18.642900 |
| H | 10.446600 | 3.656400  | 19.144100 |
| C | 12.255400 | 4.439500  | 18.276800 |
| H | 12.839700 | 3.548500  | 18.489800 |
| C | 12.858900 | 5.520300  | 17.635900 |
| H | 13.906200 | 5.461100  | 17.356400 |
| C | 14.612500 | 7.805100  | 16.342800 |
| C | 15.413200 | 7.637700  | 17.482200 |
| H | 14.965200 | 7.654600  | 18.472600 |
| C | 16.783800 | 7.432100  | 17.358300 |
| H | 17.393300 | 7.303100  | 18.248500 |
| C | 17.372100 | 7.391700  | 16.094500 |
| H | 18.442800 | 7.233200  | 15.999000 |
| C | 16.585800 | 7.555500  | 14.957800 |
| H | 17.038600 | 7.525600  | 13.970700 |
| C | 15.212600 | 7.763100  | 15.079600 |
| H | 14.595000 | 7.898400  | 14.194800 |
| C | 9.262900  | 6.444800  | 13.297700 |
| H | 8.476200  | 6.014900  | 13.927700 |
| H | 8.939500  | 6.327600  | 12.256300 |
| C | 10.566500 | 5.701300  | 13.540700 |
| H | 10.904700 | 5.886100  | 14.567400 |
| H | 10.373300 | 4.621100  | 13.453600 |
| C | 11.679800 | 6.041300  | 12.566600 |
| H | 11.365800 | 5.840500  | 11.535400 |
| H | 12.552000 | 5.408800  | 12.765500 |
| C | 9.691600  | 10.731100 | 12.614500 |
| C | 10.003200 | 8.775300  | 10.788500 |
| C | 12.065600 | 10.349600 | 11.679400 |

---

**Table S18.** Cartesian Coordinates of the Optimized Structure of (OC)<sub>3</sub>Fe(pdt)Pd(dppe) in Square Planar Geometry (**2**,  $-3200.61739333 E_h$ ).

| atom | x         | y         | z         |
|------|-----------|-----------|-----------|
| Pd   | 11.781700 | 8.815800  | 14.693900 |
| Fe   | 10.669800 | 9.373900  | 12.138700 |
| P    | 11.197000 | 9.938900  | 16.606800 |
| P    | 13.965200 | 9.097600  | 15.352900 |
| S    | 9.548200  | 8.414200  | 14.003700 |
| S    | 12.359900 | 7.847400  | 12.637100 |
| O    | 8.558800  | 11.367000 | 12.001300 |
| O    | 9.981600  | 8.130000  | 9.593400  |
| O    | 12.670600 | 11.446800 | 11.682100 |
| C    | 14.956100 | 7.591300  | 15.652200 |
| C    | 14.291100 | 6.381200  | 15.876000 |
| H    | 13.206500 | 6.351400  | 15.799900 |
| C    | 15.012800 | 5.229200  | 16.178400 |
| H    | 14.488700 | 4.292800  | 16.347600 |
| C    | 16.402900 | 5.277000  | 16.251900 |
| H    | 16.966800 | 4.376900  | 16.480200 |
| C    | 17.071700 | 6.478800  | 16.024800 |
| H    | 18.156100 | 6.517300  | 16.076000 |
| C    | 16.353500 | 7.633100  | 15.726400 |
| H    | 16.880100 | 8.564600  | 15.538400 |
| C    | 15.020600 | 10.137100 | 14.290700 |
| C    | 15.482900 | 9.606100  | 13.077900 |
| H    | 15.236200 | 8.584700  | 12.804500 |
| C    | 16.242400 | 10.389000 | 12.215800 |
| H    | 16.589600 | 9.968500  | 11.276800 |
| C    | 16.544700 | 11.708000 | 12.547100 |
| H    | 17.131900 | 12.319300 | 11.868000 |
| C    | 16.083600 | 12.244000 | 13.745800 |
| H    | 16.310600 | 13.273400 | 14.007700 |
| C    | 15.323800 | 11.464300 | 14.613700 |
| H    | 14.968100 | 11.905000 | 15.540400 |
| C    | 13.940800 | 9.923700  | 17.021500 |
| H    | 13.885700 | 9.106500  | 17.749900 |
| H    | 14.881000 | 10.455900 | 17.204700 |
| C    | 12.724400 | 10.836800 | 17.154900 |
| H    | 12.800400 | 11.698600 | 16.481500 |
| H    | 12.617900 | 11.235700 | 18.170100 |
| C    | 9.909500  | 11.227000 | 16.548900 |
| C    | 9.651900  | 11.857400 | 15.327400 |

|   |           |           |           |
|---|-----------|-----------|-----------|
| H | 10.178600 | 11.529900 | 14.433700 |
| C | 8.705700  | 12.876200 | 15.254800 |
| H | 8.497800  | 13.342100 | 14.296600 |
| C | 8.015700  | 13.268800 | 16.398800 |
| H | 7.272000  | 14.058700 | 16.340200 |
| C | 8.267000  | 12.640100 | 17.618000 |
| H | 7.722600  | 12.940100 | 18.509000 |
| C | 9.207800  | 11.618100 | 17.695900 |
| H | 9.387400  | 11.118500 | 18.644000 |
| C | 10.723600 | 8.861100  | 18.007300 |
| C | 9.714600  | 7.914100  | 17.781700 |
| H | 9.265400  | 7.843200  | 16.793600 |
| C | 9.298200  | 7.073700  | 18.808100 |
| H | 8.510700  | 6.348700  | 18.622900 |
| C | 9.893000  | 7.154500  | 20.066900 |
| H | 9.572400  | 6.491300  | 20.865200 |
| C | 10.900400 | 8.086600  | 20.297300 |
| H | 11.368200 | 8.155400  | 21.275400 |
| C | 11.311500 | 8.940200  | 19.274500 |
| H | 12.092800 | 9.666100  | 19.479400 |
| C | 9.344000  | 6.646200  | 13.556800 |
| H | 8.620500  | 6.232600  | 14.268700 |
| H | 8.892300  | 6.622800  | 12.558500 |
| C | 10.609600 | 5.804500  | 13.584800 |
| H | 11.065700 | 5.874600  | 14.581700 |
| H | 10.326200 | 4.752100  | 13.431700 |
| C | 11.644000 | 6.164300  | 12.529600 |
| H | 11.209100 | 6.081600  | 11.526700 |
| H | 12.488200 | 5.469200  | 12.591700 |
| C | 9.406900  | 10.575700 | 12.053400 |
| C | 10.216300 | 8.567200  | 10.645800 |
| C | 11.889500 | 10.619500 | 11.934100 |

---

**Table S19.** Cartesian Coordinates of the Optimized Structure of (OC)<sub>3</sub>Fe(pdt)Pd(dppe) Transition State (**2**, -3200.61680041 *E<sub>h</sub>*).

| atom | x         | y         | z         |
|------|-----------|-----------|-----------|
| Pd   | 11.497455 | 8.606819  | 14.929156 |
| Fe   | 10.879576 | 8.985757  | 12.273784 |
| P    | 13.485564 | 8.541377  | 16.075957 |
| P    | 10.855196 | 10.263067 | 16.381954 |
| S    | 9.307436  | 8.366440  | 13.962921 |
| S    | 12.202461 | 7.300807  | 13.124546 |
| O    | 9.129261  | 11.247573 | 11.734958 |
| O    | 10.345938 | 7.667185  | 9.732455  |
| O    | 13.225320 | 10.699588 | 11.966480 |
| C    | 10.052027 | 11.770660 | 15.742048 |
| C    | 10.701112 | 12.473293 | 14.717169 |
| H    | 11.632514 | 12.095837 | 14.302241 |
| C    | 10.134048 | 13.629139 | 14.193868 |
| H    | 10.641698 | 14.161556 | 13.395284 |
| C    | 8.906202  | 14.084445 | 14.672521 |
| H    | 8.457967  | 14.980234 | 14.252451 |
| C    | 8.246638  | 13.378151 | 15.673602 |
| H    | 7.281835  | 13.719398 | 16.037927 |
| C    | 8.814940  | 12.224283 | 16.209583 |
| H    | 8.290609  | 11.677353 | 16.986551 |
| C    | 9.852098  | 9.724742  | 17.815450 |
| C    | 9.720949  | 10.522457 | 18.961245 |
| H    | 10.189549 | 11.502230 | 19.005165 |
| C    | 8.973825  | 10.077267 | 20.047282 |
| H    | 8.879584  | 10.702958 | 20.930334 |
| C    | 8.345584  | 8.833264  | 19.999674 |
| H    | 7.762964  | 8.486943  | 20.848705 |
| C    | 8.463235  | 8.039162  | 18.862441 |
| H    | 7.969748  | 7.072406  | 18.818657 |
| C    | 9.214385  | 8.480649  | 17.774979 |
| H    | 9.309546  | 7.872979  | 16.878827 |
| C    | 12.423418 | 10.880985 | 17.165620 |
| H    | 12.909781 | 11.524414 | 16.423641 |
| H    | 12.206074 | 11.498585 | 18.043849 |
| C    | 13.303310 | 9.687804  | 17.528287 |
| H    | 12.823335 | 9.092318  | 18.313858 |
| H    | 14.282608 | 9.995287  | 17.912093 |
| C    | 14.013556 | 6.970992  | 16.853607 |
| C    | 13.052015 | 5.983952  | 17.093078 |

|   |           |           |           |
|---|-----------|-----------|-----------|
| H | 12.030909 | 6.150134  | 16.756738 |
| C | 13.403447 | 4.802217  | 17.740715 |
| H | 12.650683 | 4.039702  | 17.919814 |
| C | 14.719935 | 4.595247  | 18.145855 |
| H | 14.996783 | 3.670436  | 18.644160 |
| C | 15.684659 | 5.572127  | 17.904375 |
| H | 16.713243 | 5.410501  | 18.214488 |
| C | 15.335674 | 6.755995  | 17.261047 |
| H | 16.093711 | 7.509267  | 17.065172 |
| C | 14.971256 | 9.112559  | 15.180132 |
| C | 15.485903 | 8.304064  | 14.156008 |
| H | 15.011906 | 7.354619  | 13.926744 |
| C | 16.589366 | 8.720585  | 13.419841 |
| H | 16.974010 | 8.086409  | 12.626579 |
| H | 17.144522 | 11.719605 | 14.913323 |
| C | 15.579779 | 10.345365 | 15.441528 |
| H | 15.200589 | 10.996463 | 16.223407 |
| C | 8.926412  | 6.611579  | 13.603961 |
| H | 8.034156  | 6.369887  | 14.193251 |
| H | 8.662038  | 6.543146  | 12.542208 |
| C | 10.030491 | 5.621616  | 13.938409 |
| H | 10.318373 | 5.745224  | 14.991186 |
| H | 9.629507  | 4.602350  | 13.830209 |
| C | 11.269092 | 5.723169  | 13.062841 |
| H | 11.003080 | 5.575575  | 12.009591 |
| H | 11.982147 | 4.940382  | 13.342866 |
| C | 9.836072  | 10.357286 | 11.955488 |
| C | 10.504566 | 8.151036  | 10.777608 |
| C | 12.304715 | 10.010247 | 12.152188 |

---

**Table S20.** Cartesian Coordinates of the Optimized Structure of  $[(OC)_3Fe(pdt)Pd(dppe)]^+$  ( $[2]^+$ ,  $-3200.43767846 E_h$ ).

| atom | x         | y         | z         |
|------|-----------|-----------|-----------|
| Pd   | 11.854982 | 8.736043  | 14.815498 |
| Fe   | 10.777786 | 9.068406  | 12.064401 |
| S    | 12.425307 | 7.598521  | 12.799867 |
| S    | 9.625973  | 8.470910  | 13.999975 |
| P    | 14.040055 | 9.089183  | 15.468396 |
| P    | 11.237858 | 9.891102  | 16.713456 |
| O    | 9.045323  | 11.434872 | 11.855920 |
| O    | 9.408649  | 7.290846  | 10.092489 |
| O    | 12.797508 | 10.276257 | 10.299961 |
| C    | 14.895033 | 10.344663 | 14.470937 |
| C    | 15.285161 | 11.582917 | 14.994634 |
| H    | 15.118212 | 11.825224 | 16.039603 |
| C    | 15.906894 | 12.524049 | 14.177046 |
| H    | 16.209026 | 13.480271 | 14.593240 |
| C    | 16.144413 | 12.237396 | 12.835609 |
| H    | 16.629443 | 12.972697 | 12.200918 |
| C    | 15.761754 | 11.004520 | 12.308319 |
| H    | 15.946407 | 10.776075 | 11.263345 |
| C    | 15.136887 | 10.062295 | 13.117500 |
| H    | 14.844970 | 9.101879  | 12.700381 |
| C    | 15.119701 | 7.630092  | 15.527871 |
| C    | 16.495562 | 7.724784  | 15.291357 |
| H    | 16.938827 | 8.675585  | 15.010991 |
| C    | 17.298053 | 6.592898  | 15.408462 |
| H    | 18.364773 | 6.669332  | 15.221195 |
| C    | 16.736206 | 5.368377  | 15.762558 |
| H    | 17.365976 | 4.488252  | 15.850462 |
| C    | 15.365825 | 5.269860  | 15.999656 |
| H    | 14.926596 | 4.314885  | 16.272125 |
| C    | 14.557589 | 6.395375  | 15.878084 |
| H    | 13.485996 | 6.317068  | 16.049452 |
| C    | 10.525043 | 8.808034  | 17.988538 |
| C    | 9.269577  | 8.232066  | 17.739395 |
| H    | 8.740765  | 8.464623  | 16.818478 |
| C    | 8.693367  | 7.380654  | 18.675249 |
| H    | 7.715861  | 6.949673  | 18.480674 |
| C    | 9.365300  | 7.084371  | 19.861061 |
| H    | 8.914105  | 6.417644  | 20.589545 |
| C    | 10.612202 | 7.649419  | 20.112732 |



|   |           |           |           |
|---|-----------|-----------|-----------|
| H | 11.135632 | 7.427935  | 21.037839 |
| C | 11.191431 | 8.510321  | 19.182638 |
| H | 12.159082 | 8.949006  | 19.405908 |
| C | 10.089002 | 11.278550 | 16.498073 |
| C | 10.135924 | 12.004375 | 15.300989 |
| H | 10.810408 | 11.694588 | 14.505560 |
| C | 9.313966  | 13.112703 | 15.124545 |
| H | 9.346640  | 13.665584 | 14.191011 |
| C | 8.439451  | 13.497923 | 16.139032 |
| H | 7.792544  | 14.358544 | 15.998362 |
| C | 8.387795  | 12.777012 | 17.330468 |
| H | 7.704382  | 13.076201 | 18.119332 |
| C | 9.208551  | 11.668004 | 17.514433 |
| H | 9.158722  | 11.106046 | 18.442344 |
| C | 11.650156 | 5.939290  | 12.960028 |
| H | 11.224426 | 5.694893  | 11.980737 |
| H | 12.482286 | 5.251848  | 13.138781 |
| C | 10.610965 | 5.786002  | 14.057813 |
| H | 10.286165 | 4.735476  | 14.063305 |
| H | 11.074669 | 5.980470  | 15.033892 |
| C | 9.370140  | 6.650081  | 13.911083 |
| H | 8.667109  | 6.419738  | 14.717131 |
| H | 8.860295  | 6.447581  | 12.963038 |
| C | 9.725631  | 10.514075 | 11.945242 |
| C | 9.930075  | 8.008184  | 10.819933 |
| C | 12.010691 | 9.814646  | 10.997422 |
| C | 13.979130 | 9.713049  | 17.212909 |
| H | 13.896052 | 8.813935  | 17.834109 |
| H | 14.924516 | 10.196206 | 17.483609 |
| C | 12.781494 | 10.636156 | 17.420806 |
| H | 12.915128 | 11.580259 | 16.880500 |
| H | 12.637293 | 10.893792 | 18.475984 |

---

**Table S21.** Cartesian Coordinates of the Optimized Structure of  $[(OC)_3Fe(pdt)Pd(dppe)]^{2+}$  ( $[2]^{2+}$ ,  $-3200.09088385 E_h$ ).

| atom | x         | y         | z         |
|------|-----------|-----------|-----------|
| Pd   | 11.833087 | 8.753169  | 14.802254 |
| Fe   | 10.807468 | 9.161728  | 12.316504 |
| S    | 12.405285 | 7.632314  | 12.737285 |
| S    | 9.573492  | 8.370425  | 14.014806 |
| P    | 14.039770 | 9.135241  | 15.446048 |
| P    | 11.226139 | 9.924011  | 16.718636 |
| O    | 8.952692  | 11.493561 | 12.248211 |
| O    | 9.500865  | 7.706593  | 10.164916 |
| O    | 12.775390 | 10.567436 | 10.577873 |
| C    | 14.882298 | 10.344930 | 14.396305 |
| C    | 15.184767 | 11.634208 | 14.856043 |
| H    | 14.943775 | 11.939799 | 15.869318 |
| C    | 15.829221 | 12.539896 | 14.017396 |
| H    | 16.071387 | 13.532331 | 14.384381 |
| C    | 16.176273 | 12.168833 | 12.720271 |
| H    | 16.686460 | 12.874949 | 12.072617 |
| C    | 15.879978 | 10.886619 | 12.257405 |
| H    | 16.164529 | 10.591158 | 11.252297 |
| C    | 15.230212 | 9.977650  | 13.085408 |
| H    | 15.021330 | 8.974306  | 12.723277 |
| C    | 15.030431 | 7.623365  | 15.511610 |
| C    | 16.382246 | 7.609495  | 15.146098 |
| H    | 16.860291 | 8.505536  | 14.763206 |
| C    | 17.120180 | 6.436207  | 15.281808 |
| H    | 18.168729 | 6.427585  | 15.001382 |
| C    | 16.519906 | 5.281487  | 15.779038 |
| H    | 17.101624 | 4.370902  | 15.883222 |
| C    | 15.174245 | 5.292684  | 16.148218 |
| H    | 14.710094 | 4.394125  | 16.542959 |
| C    | 14.428880 | 6.458463  | 16.013533 |
| H    | 13.381025 | 6.466261  | 16.310523 |
| C    | 10.564130 | 8.793486  | 17.968291 |
| C    | 9.346938  | 8.138844  | 17.712043 |
| H    | 8.799905  | 8.342082  | 16.794695 |
| C    | 8.816262  | 7.260628  | 18.650116 |
| H    | 7.865302  | 6.773902  | 18.456559 |
| C    | 9.497573  | 7.014579  | 19.842498 |
| H    | 9.081019  | 6.328956  | 20.573721 |
| C    | 10.706241 | 7.656753  | 20.100526 |

|   |           |           |           |
|---|-----------|-----------|-----------|
| H | 11.231851 | 7.476336  | 21.032912 |
| C | 11.240588 | 8.544847  | 19.170389 |
| H | 12.174627 | 9.046064  | 19.403236 |
| C | 10.062853 | 11.283120 | 16.454196 |
| C | 10.360762 | 12.216405 | 15.447780 |
| H | 11.246796 | 12.090859 | 14.826843 |
| C | 9.534115  | 13.316790 | 15.253636 |
| H | 9.770790  | 14.044518 | 14.483545 |
| C | 8.402247  | 13.486687 | 16.052350 |
| H | 7.756844  | 14.346033 | 15.899663 |
| C | 8.102287  | 12.560403 | 17.048264 |
| H | 7.226280  | 12.697943 | 17.674222 |
| C | 8.928334  | 11.457995 | 17.255298 |
| H | 8.694616  | 10.750100 | 18.043942 |
| C | 11.730759 | 5.938043  | 12.971263 |
| H | 11.311936 | 5.639735  | 12.004162 |
| H | 12.618068 | 5.321951  | 13.144163 |
| C | 10.734606 | 5.748906  | 14.101191 |
| H | 10.469123 | 4.683182  | 14.129236 |
| H | 11.213410 | 5.974339  | 15.062113 |
| C | 9.441633  | 6.534501  | 13.978624 |
| H | 8.779887  | 6.296931  | 14.816489 |
| H | 8.899093  | 6.287542  | 13.059841 |
| C | 9.670664  | 10.613724 | 12.293923 |
| C | 10.011408 | 8.314770  | 10.983064 |
| C | 12.034188 | 10.032375 | 11.253736 |
| C | 13.977082 | 9.794566  | 17.173734 |
| H | 13.927454 | 8.909734  | 17.818220 |
| H | 14.918239 | 10.303017 | 17.411490 |
| C | 12.768637 | 10.699069 | 17.380432 |
| H | 12.875993 | 11.642101 | 16.833211 |
| H | 12.628107 | 10.966506 | 18.433770 |

---

**Table S22.** Cartesian Coordinates of the Optimized Structure of  $[(OC)_3FeH(pdt)Pd(dppe)]^+ ([2H]^+, -3201.05077293 E_h)$ .

| atom | x         | y        | z         |
|------|-----------|----------|-----------|
| Pd   | 6.095431  | 7.186811 | 2.688546  |
| Fe   | 8.509967  | 6.581939 | 1.171311  |
| H    | 8.285184  | 7.195985 | 2.565487  |
| S    | 6.812839  | 5.083952 | 1.817382  |
| S    | 6.735260  | 7.987850 | 0.534187  |
| P    | 5.657809  | 6.343251 | 4.776299  |
| P    | 5.482312  | 9.237899 | 3.537457  |
| O    | 10.404242 | 4.925468 | 2.659786  |
| O    | 8.942553  | 5.408074 | -1.512579 |
| O    | 10.294243 | 8.881756 | 0.916214  |
| C    | 9.675240  | 5.568008 | 2.054044  |
| C    | 8.756095  | 5.859529 | -0.475858 |
| C    | 9.611063  | 7.965641 | 0.996975  |
| C    | 5.823327  | 4.727509 | 0.313356  |
| H    | 6.511186  | 4.353604 | -0.452986 |
| H    | 5.169220  | 3.896333 | 0.594800  |
| C    | 4.983116  | 5.874926 | -0.225314 |
| H    | 4.275038  | 6.199072 | 0.548769  |
| H    | 4.385862  | 5.488315 | -1.063252 |
| C    | 5.756770  | 7.083969 | -0.726277 |
| H    | 5.058862  | 7.824212 | -1.129279 |
| H    | 6.440352  | 6.804761 | -1.535558 |
| C    | 4.061714  | 5.489638 | 4.947747  |
| C    | 3.259760  | 5.271695 | 3.822663  |
| H    | 3.615401  | 5.592830 | 2.847218  |
| C    | 2.020528  | 4.648706 | 3.953396  |
| H    | 1.403094  | 4.482683 | 3.075756  |
| C    | 1.576609  | 4.239696 | 5.207821  |
| H    | 0.610934  | 3.753979 | 5.310395  |
| C    | 2.371734  | 4.450751 | 6.334485  |
| H    | 2.027803  | 4.128248 | 7.312511  |
| C    | 3.608905  | 5.073012 | 6.208595  |
| H    | 4.226216  | 5.218947 | 7.091412  |
| C    | 6.938108  | 5.260111 | 5.473125  |
| C    | 8.205092  | 5.799000 | 5.741604  |
| H    | 8.410463  | 6.849735 | 5.551340  |
| C    | 9.218062  | 4.987432 | 6.239471  |
| H    | 10.194430 | 5.412631 | 6.450628  |
| C    | 8.981556  | 3.630903 | 6.459375  |

## S61

|   |          |           |          |
|---|----------|-----------|----------|
| H | 9.774666 | 2.998054  | 6.845698 |
| C | 7.731763 | 3.087203  | 6.175653 |
| H | 7.547299 | 2.029649  | 6.337872 |
| C | 6.710856 | 3.895048  | 5.681068 |
| H | 5.740269 | 3.462145  | 5.461229 |
| C | 5.534954 | 7.797021  | 5.922035 |
| H | 5.040966 | 7.499212  | 6.853020 |
| H | 6.555762 | 8.103661  | 6.174142 |
| C | 4.775002 | 8.919393  | 5.221364 |
| H | 4.753057 | 9.839835  | 5.814846 |
| H | 3.732193 | 8.626440  | 5.051532 |
| C | 4.192711 | 10.149715 | 2.639543 |
| C | 4.085687 | 11.542051 | 2.740187 |
| H | 4.816087 | 12.107447 | 3.311453 |
| C | 3.044769 | 12.205598 | 2.097052 |
| H | 2.966710 | 13.285749 | 2.174786 |
| C | 2.108970 | 11.488331 | 1.354382 |
| H | 1.300411 | 12.010762 | 0.852060 |
| C | 2.212426 | 10.102348 | 1.250623 |
| H | 1.486414 | 9.543629  | 0.667577 |
| C | 3.253304 | 9.433822  | 1.887532 |
| H | 3.347172 | 8.354140  | 1.797978 |
| C | 6.870059 | 10.394169 | 3.754245 |
| C | 7.336756 | 10.780799 | 5.016189 |
| H | 6.856064 | 10.425085 | 5.922302 |
| C | 8.424687 | 11.644151 | 5.127069 |
| H | 8.775460 | 11.942043 | 6.110562 |
| C | 9.053087 | 12.128107 | 3.983132 |
| H | 9.899773 | 12.801889 | 4.072239 |
| C | 8.591248 | 11.750104 | 2.722893 |
| H | 9.075859 | 12.128171 | 1.828045 |
| C | 7.508503 | 10.885849 | 2.605327 |
| H | 7.153875 | 10.597018 | 1.619517 |

---

**Table S23.** Cartesian Coordinates of the Optimized Structure of (OC)<sub>3</sub>Fe(pdt)Pt(dppe) in Tetrahedral Geometry (**3**, -3192.11918792 *E<sub>h</sub>*).

| atom | x         | y         | z        |
|------|-----------|-----------|----------|
| Pt   | 8.738200  | 10.001500 | 3.030000 |
| Fe   | 6.486600  | 11.248700 | 2.958400 |
| P    | 10.467000 | 8.570300  | 2.596300 |
| P    | 9.885500  | 10.704400 | 4.848700 |
| S    | 6.779700  | 9.244800  | 1.915400 |
| S    | 7.945600  | 12.308100 | 1.466800 |
| O    | 5.377300  | 9.683000  | 5.171900 |
| O    | 4.067900  | 12.278200 | 1.684100 |
| O    | 7.161700  | 13.503100 | 4.687100 |
| C    | 10.872500 | 12.245700 | 4.758900 |
| C    | 10.761500 | 13.066200 | 3.632800 |
| H    | 10.063900 | 12.799600 | 2.841300 |
| C    | 11.538100 | 14.219700 | 3.526200 |
| H    | 11.436900 | 14.852700 | 2.649200 |
| C    | 12.430600 | 14.559600 | 4.538100 |
| H    | 13.034400 | 15.459000 | 4.453900 |
| C    | 12.547700 | 13.745400 | 5.664900 |
| H    | 13.240800 | 14.008600 | 6.459100 |
| C    | 11.774100 | 12.594900 | 5.775400 |
| H    | 11.862200 | 11.976000 | 6.665100 |
| C    | 9.022700  | 10.765600 | 6.461200 |
| C    | 8.889900  | 11.942800 | 7.204700 |
| H    | 9.326500  | 12.867900 | 6.843300 |
| C    | 8.186800  | 11.936900 | 8.408100 |
| H    | 8.086900  | 12.859300 | 8.973300 |
| C    | 7.612500  | 10.760900 | 8.881000 |
| H    | 7.065100  | 10.759700 | 9.819200 |
| C    | 7.728600  | 9.586900  | 8.137600 |
| H    | 7.266300  | 8.669300  | 8.489800 |
| C    | 8.419500  | 9.590700  | 6.931700 |
| H    | 8.466700  | 8.681700  | 6.336800 |
| C    | 11.208600 | 9.418200  | 5.128200 |
| H    | 11.969900 | 9.797700  | 5.818200 |
| H    | 10.731800 | 8.552900  | 5.602400 |
| C    | 11.823200 | 9.023100  | 3.789400 |
| H    | 12.536200 | 8.199800  | 3.904900 |
| H    | 12.364600 | 9.870400  | 3.352200 |
| C    | 10.179300 | 6.793600  | 2.940000 |
| C    | 8.872400  | 6.343900  | 3.156500 |

|   |           |           |           |
|---|-----------|-----------|-----------|
| H | 8.052100  | 7.054500  | 3.097500  |
| C | 8.629000  | 5.002700  | 3.448600  |
| H | 7.609500  | 4.666500  | 3.614400  |
| C | 9.686400  | 4.101300  | 3.531600  |
| H | 9.496000  | 3.057000  | 3.763100  |
| C | 10.992700 | 4.540300  | 3.318200  |
| H | 11.821200 | 3.840200  | 3.380800  |
| C | 11.238400 | 5.878000  | 3.024200  |
| H | 12.260200 | 6.204900  | 2.847900  |
| C | 11.301400 | 8.624700  | 0.965600  |
| C | 11.460600 | 7.506300  | 0.141100  |
| H | 11.107100 | 6.533700  | 0.469100  |
| C | 12.071100 | 7.632700  | -1.105800 |
| H | 12.186900 | 6.756000  | -1.737000 |
| C | 12.530400 | 8.872300  | -1.540500 |
| H | 13.007700 | 8.967600  | -2.511700 |
| C | 12.364400 | 9.994700  | -0.729400 |
| H | 12.706500 | 10.968700 | -1.067700 |
| C | 11.744000 | 9.875100  | 0.508900  |
| H | 11.577300 | 10.761700 | 1.116800  |
| C | 6.853900  | 9.342000  | 0.084600  |
| H | 7.112300  | 8.326800  | -0.236200 |
| H | 5.822300  | 9.530200  | -0.236800 |
| C | 7.801900  | 10.341400 | -0.550800 |
| H | 8.833200  | 10.109100 | -0.260400 |
| H | 7.733200  | 10.201200 | -1.640500 |
| C | 7.502400  | 11.797100 | -0.225800 |
| H | 6.446700  | 12.026300 | -0.416600 |
| H | 8.094600  | 12.443800 | -0.883000 |
| C | 5.817600  | 10.298800 | 4.302100  |
| C | 5.018000  | 11.869200 | 2.194100  |
| C | 6.893900  | 12.607700 | 4.010500  |

---

**Table S24.** Cartesian Coordinates of the Optimized Structure of (OC)<sub>3</sub>Fe(pdt)Pt(dppe) in Square Planar Geometry (**3**, -3192.15744694 *E<sub>h</sub>*).

| atom | x         | y         | z         |
|------|-----------|-----------|-----------|
| Pt   | 8.834100  | 9.939500  | 2.856100  |
| Fe   | 6.332300  | 11.335800 | 2.985400  |
| P    | 9.272400  | 7.981900  | 3.931600  |
| P    | 10.852600 | 10.676800 | 3.621300  |
| S    | 6.735200  | 9.224600  | 1.979000  |
| S    | 8.267600  | 12.012600 | 1.849700  |
| O    | 4.233500  | 10.087200 | 4.562100  |
| O    | 4.523300  | 13.019000 | 1.436900  |
| O    | 7.182900  | 12.857200 | 5.323100  |
| C    | 12.090300 | 11.144600 | 2.360500  |
| C    | 11.950700 | 10.646500 | 1.061000  |
| H    | 11.072400 | 10.053200 | 0.818600  |
| C    | 12.917900 | 10.921800 | 0.098000  |
| H    | 12.801100 | 10.534800 | -0.909700 |
| C    | 14.026000 | 11.699800 | 0.425100  |
| H    | 14.776800 | 11.920400 | -0.327900 |
| C    | 14.168300 | 12.201200 | 1.717400  |
| H    | 15.028700 | 12.812300 | 1.973100  |
| C    | 13.205600 | 11.925900 | 2.684100  |
| H    | 13.314800 | 12.329200 | 3.686500  |
| C    | 10.846200 | 12.075500 | 4.791900  |
| C    | 10.584400 | 13.362100 | 4.300300  |
| H    | 10.422100 | 13.513400 | 3.237500  |
| C    | 10.513800 | 14.442600 | 5.171800  |
| H    | 10.304300 | 15.433100 | 4.780600  |
| C    | 10.697100 | 14.254500 | 6.540000  |
| H    | 10.635000 | 15.099500 | 7.218700  |
| C    | 10.950500 | 12.979300 | 7.036000  |
| H    | 11.088800 | 12.825100 | 8.101700  |
| C    | 11.023600 | 11.893600 | 6.167600  |
| H    | 11.215600 | 10.906100 | 6.575900  |
| C    | 11.665800 | 9.258600  | 4.507800  |
| H    | 12.221200 | 8.715700  | 3.735600  |
| H    | 12.397600 | 9.627600  | 5.233400  |
| C    | 10.619200 | 8.352000  | 5.148600  |
| H    | 10.112500 | 8.854800  | 5.979400  |
| H    | 11.057900 | 7.433900  | 5.552300  |
| C    | 7.959300  | 7.211200  | 4.932600  |
| C    | 6.949100  | 8.029000  | 5.448800  |



|   |           |           |           |
|---|-----------|-----------|-----------|
| H | 6.934600  | 9.085900  | 5.191800  |
| C | 5.956900  | 7.482300  | 6.257800  |
| H | 5.164200  | 8.121300  | 6.632800  |
| C | 5.971300  | 6.122000  | 6.555100  |
| H | 5.192600  | 5.695000  | 7.180200  |
| C | 6.975600  | 5.303700  | 6.040300  |
| H | 6.981900  | 4.241200  | 6.264800  |
| C | 7.967200  | 5.842700  | 5.226900  |
| H | 8.737900  | 5.198900  | 4.813000  |
| C | 9.903800  | 6.635300  | 2.866700  |
| C | 9.152400  | 6.300500  | 1.731700  |
| H | 8.242400  | 6.855200  | 1.516600  |
| C | 9.571200  | 5.276400  | 0.890300  |
| H | 8.977300  | 5.020900  | 0.018100  |
| C | 10.752500 | 4.585500  | 1.159100  |
| H | 11.082900 | 3.792200  | 0.495500  |
| C | 11.508000 | 4.916800  | 2.279200  |
| H | 12.428900 | 4.383300  | 2.494500  |
| C | 11.083800 | 5.933500  | 3.133800  |
| H | 11.684100 | 6.169400  | 4.007000  |
| C | 6.684500  | 9.545100  | 0.170700  |
| H | 6.625900  | 8.562800  | -0.309500 |
| H | 5.745100  | 10.074700 | -0.019900 |
| C | 7.860400  | 10.316300 | -0.403900 |
| H | 8.788800  | 9.784000  | -0.160600 |
| H | 7.764300  | 10.320100 | -1.499300 |
| C | 7.975300  | 11.759400 | 0.057900  |
| H | 7.061600  | 12.314700 | -0.180700 |
| H | 8.811200  | 12.244300 | -0.455900 |
| C | 5.074400  | 10.588600 | 3.938500  |
| C | 5.249200  | 12.297900 | 1.989700  |
| C | 6.895200  | 12.207700 | 4.400600  |

---

**Table S25.** Cartesian Coordinates of the Optimized Structure of  $[(OC)_3Fe(pdt)Pt(dppe)]^+$  ( $[3]^+$ ,  $-3191.97670157 E_h$ ).

| atom | x         | y         | z         |
|------|-----------|-----------|-----------|
| Pt   | 11.863461 | 8.743407  | 14.836427 |
| Fe   | 10.766466 | 9.085595  | 12.071662 |
| S    | 12.422215 | 7.610947  | 12.796310 |
| S    | 9.624758  | 8.456885  | 14.010101 |
| P    | 14.041834 | 9.102312  | 15.470268 |
| P    | 11.242029 | 9.887200  | 16.726569 |
| O    | 9.009464  | 11.434779 | 11.877478 |
| O    | 9.415015  | 7.319646  | 10.077916 |
| O    | 12.777940 | 10.333251 | 10.324910 |
| C    | 14.905411 | 10.344611 | 14.463995 |
| C    | 15.285654 | 11.590259 | 14.976124 |
| H    | 15.105002 | 11.845497 | 16.015317 |
| C    | 15.913423 | 12.522663 | 14.153308 |
| H    | 16.207478 | 13.485067 | 14.559629 |
| C    | 16.166967 | 12.218765 | 12.818996 |
| H    | 16.656993 | 12.946659 | 12.180377 |
| C    | 15.794065 | 10.978044 | 12.303645 |
| H    | 15.991970 | 10.736836 | 11.264440 |
| C    | 15.163119 | 10.044487 | 13.117710 |
| H    | 14.878395 | 9.078206  | 12.710224 |
| C    | 15.108712 | 7.634832  | 15.530625 |
| C    | 16.487425 | 7.724210  | 15.310297 |
| H    | 16.937915 | 8.673441  | 15.037555 |
| C    | 17.282996 | 6.588268  | 15.432427 |
| H    | 18.351605 | 6.659771  | 15.257119 |
| C    | 16.711179 | 5.365636  | 15.775998 |
| H    | 17.335471 | 4.482559  | 15.867982 |
| C    | 15.338068 | 5.272935  | 15.997841 |
| H    | 14.891819 | 4.319609  | 16.262712 |
| C    | 14.536246 | 6.402453  | 15.871785 |
| H    | 13.462934 | 6.332475  | 16.031406 |
| C    | 10.529708 | 8.808128  | 18.004955 |
| C    | 9.275541  | 8.229506  | 17.757606 |
| H    | 8.745945  | 8.457760  | 16.836483 |
| C    | 8.701992  | 7.379660  | 18.696271 |
| H    | 7.725853  | 6.945825  | 18.503820 |
| C    | 9.375069  | 7.088953  | 19.882618 |
| H    | 8.925763  | 6.423769  | 20.613017 |
| C    | 10.620515 | 7.657254  | 20.132283 |

|   |           |           |           |
|---|-----------|-----------|-----------|
| H | 11.144484 | 7.439464  | 21.057385 |
| C | 11.197337 | 8.516502  | 19.199301 |
| H | 12.164279 | 8.957276  | 19.419635 |
| C | 10.088690 | 11.268752 | 16.502533 |
| C | 10.133765 | 11.988862 | 15.302132 |
| H | 10.808426 | 11.673527 | 14.509799 |
| C | 9.310323  | 13.095429 | 15.122730 |
| H | 9.340575  | 13.644296 | 14.187284 |
| C | 8.438002  | 13.484627 | 16.137361 |
| H | 7.790644  | 14.343967 | 15.994271 |
| C | 8.389479  | 12.769734 | 17.332229 |
| H | 7.707592  | 13.072060 | 18.120559 |
| C | 9.211252  | 11.662265 | 17.519516 |
| H | 9.163715  | 11.104318 | 18.449546 |
| C | 11.652298 | 5.945611  | 12.928522 |
| H | 11.234742 | 5.718296  | 11.942578 |
| H | 12.487319 | 5.261020  | 13.098978 |
| C | 10.611443 | 5.771617  | 14.020427 |
| H | 10.287612 | 4.721976  | 14.005264 |
| H | 11.074905 | 5.949393  | 14.998445 |
| C | 9.370000  | 6.636453  | 13.893968 |
| H | 8.672019  | 6.395298  | 14.700022 |
| H | 8.853246  | 6.454130  | 12.946544 |
| C | 9.700263  | 10.521538 | 11.961951 |
| C | 9.929148  | 8.031319  | 10.816087 |
| C | 11.994468 | 9.855787  | 11.015063 |
| C | 13.987589 | 9.731714  | 17.210900 |
| H | 13.921084 | 8.833328  | 17.833626 |
| H | 14.929544 | 10.225839 | 17.468834 |
| C | 12.781585 | 10.641842 | 17.427294 |
| H | 12.901197 | 11.588773 | 16.890399 |
| H | 12.637675 | 10.892784 | 18.482951 |

---

**Table S26.** Cartesian Coordinates of the Optimized Structure of  $[(OC)_3Fe(pdt)Pt(dppe)]^{2+}$  (**[3]**<sup>2+</sup>, -3191.58941051  $E_h$ ).

| atom | x         | y         | z         |
|------|-----------|-----------|-----------|
| Pt   | 11.816103 | 8.719779  | 14.817908 |
| Fe   | 10.716523 | 9.376754  | 12.453897 |
| S    | 12.262769 | 7.734196  | 12.647644 |
| S    | 9.511846  | 8.426952  | 14.108502 |
| P    | 14.050086 | 9.033625  | 15.404095 |
| P    | 11.280344 | 9.943206  | 16.714104 |
| O    | 8.951676  | 11.760526 | 12.722386 |
| O    | 9.288697  | 8.246361  | 10.182101 |
| O    | 12.688235 | 10.922353 | 10.846741 |
| C    | 14.939080 | 10.184049 | 14.325481 |
| C    | 15.309713 | 11.463647 | 14.761262 |
| H    | 15.089283 | 11.798753 | 15.769872 |
| C    | 15.999864 | 12.318656 | 13.905681 |
| H    | 16.294755 | 13.303514 | 14.254024 |
| C    | 16.325836 | 11.905234 | 12.616106 |
| H    | 16.871521 | 12.571239 | 11.955035 |
| C    | 15.964295 | 10.630958 | 12.178430 |
| H    | 16.233364 | 10.301357 | 11.179707 |
| C    | 15.269755 | 9.772398  | 13.023656 |
| H    | 15.011704 | 8.774064  | 12.680699 |
| C    | 14.985324 | 7.489227  | 15.488863 |
| C    | 16.355094 | 7.451581  | 15.198632 |
| H    | 16.872227 | 8.342751  | 14.856948 |
| C    | 17.059134 | 6.260141  | 15.352018 |
| H    | 18.120978 | 6.232632  | 15.128785 |
| C    | 16.407093 | 5.110211  | 15.792166 |
| H    | 16.962238 | 4.184846  | 15.910150 |
| C    | 15.043513 | 5.144481  | 16.084908 |
| H    | 14.538631 | 4.248626  | 16.432912 |
| C    | 14.332283 | 6.329447  | 15.933136 |
| H    | 13.269875 | 6.356986  | 16.169998 |
| C    | 10.694990 | 8.910261  | 18.078119 |
| C    | 10.581620 | 7.523013  | 17.923756 |
| H    | 10.810066 | 7.067258  | 16.962085 |
| C    | 10.172046 | 6.730996  | 18.993241 |
| H    | 10.084351 | 5.655856  | 18.871469 |
| C    | 9.872171  | 7.322018  | 20.218492 |
| H    | 9.551270  | 6.705733  | 21.052514 |
| C    | 9.978546  | 8.704271  | 20.377395 |

|   |           |           |           |
|---|-----------|-----------|-----------|
| H | 9.739347  | 9.162735  | 21.331710 |
| C | 10.388427 | 9.500639  | 19.313859 |
| H | 10.453686 | 10.577720 | 19.445649 |
| C | 10.084791 | 11.273668 | 16.441500 |
| C | 10.488602 | 12.485267 | 15.857595 |
| H | 11.524932 | 12.655442 | 15.579038 |
| C | 9.557928  | 13.495639 | 15.639948 |
| H | 9.877494  | 14.438374 | 15.206826 |
| C | 8.220822  | 13.301627 | 15.986194 |
| H | 7.498325  | 14.094693 | 15.820466 |
| C | 7.812116  | 12.093998 | 16.549370 |
| H | 6.772387  | 11.943829 | 16.822502 |
| C | 8.736910  | 11.079057 | 16.777228 |
| H | 8.413311  | 10.147854 | 17.232118 |
| C | 11.505855 | 6.058315  | 12.676961 |
| H | 11.030793 | 5.919993  | 11.699902 |
| H | 12.362765 | 5.379704  | 12.719742 |
| C | 10.550557 | 5.766068  | 13.818793 |
| H | 10.234147 | 4.718445  | 13.723443 |
| H | 11.086308 | 5.843169  | 14.772662 |
| C | 9.293610  | 6.615388  | 13.862963 |
| H | 8.660113  | 6.307941  | 14.700279 |
| H | 8.696699  | 6.505686  | 12.951203 |
| C | 9.638613  | 10.858585 | 12.643741 |
| C | 9.846612  | 8.729604  | 11.051005 |
| C | 11.945578 | 10.328316 | 11.469549 |
| C | 14.010408 | 9.736476  | 17.113751 |
| H | 13.891288 | 8.876500  | 17.783605 |
| H | 14.977855 | 10.190560 | 17.354540 |
| C | 12.857526 | 10.719659 | 17.288697 |
| H | 13.020614 | 11.633019 | 16.708795 |
| H | 12.745801 | 11.014027 | 18.337790 |

---

**Table S27.** Cartesian Coordinates of the Optimized Structure of  $[(OC)_3FeH(pdt)Pt(dppe)]^+ ([3H]^+, -3192.54469861 E_h)$ .

| atom | x         | y         | z         |
|------|-----------|-----------|-----------|
| Pt   | 11.834508 | 8.781878  | 14.817795 |
| Fe   | 10.689583 | 9.345467  | 12.140051 |
| H    | 11.464302 | 10.214107 | 13.153090 |
| S    | 12.297473 | 7.722497  | 12.707935 |
| S    | 9.561309  | 8.574193  | 14.059110 |
| P    | 14.022670 | 9.039734  | 15.446924 |
| P    | 11.276640 | 9.906334  | 16.726502 |
| O    | 8.911424  | 11.666102 | 12.135742 |
| O    | 9.210437  | 7.661298  | 10.204367 |
| O    | 12.641080 | 10.506653 | 10.300964 |
| C    | 14.964209 | 10.213792 | 14.423773 |
| C    | 15.393289 | 11.454946 | 14.907906 |
| H    | 15.206440 | 11.747688 | 15.936543 |
| C    | 16.080430 | 12.333954 | 14.073059 |
| H    | 16.412747 | 13.292593 | 14.459808 |
| C    | 16.345655 | 11.981219 | 12.753042 |
| H    | 16.882712 | 12.666940 | 12.104837 |
| C    | 15.924995 | 10.744367 | 12.265294 |
| H    | 16.133835 | 10.463417 | 11.237655 |
| C    | 15.235652 | 9.864530  | 13.092140 |
| H    | 14.913482 | 8.901616  | 12.704625 |
| C    | 15.024897 | 7.527987  | 15.538492 |
| C    | 16.419946 | 7.579761  | 15.432764 |
| H    | 16.919525 | 8.522093  | 15.227773 |
| C    | 17.169964 | 6.416510  | 15.580218 |
| H    | 18.251432 | 6.459764  | 15.494200 |
| C    | 16.536400 | 5.201615  | 15.833692 |
| H    | 17.125544 | 4.296341  | 15.945284 |
| C    | 15.147801 | 5.145763  | 15.939307 |
| H    | 14.653573 | 4.198345  | 16.132654 |
| C    | 14.391945 | 6.304370  | 15.789035 |
| H    | 13.307469 | 6.267989  | 15.857518 |
| C    | 10.701638 | 8.870913  | 18.105387 |
| C    | 10.492434 | 7.501157  | 17.914967 |
| H    | 10.657246 | 7.074316  | 16.929380 |
| C    | 10.082208 | 6.699646  | 18.978045 |
| H    | 9.921905  | 5.636853  | 18.823615 |
| C    | 9.879549  | 7.261457  | 20.235606 |
| H    | 9.560536  | 6.636924  | 21.064570 |

|   |           |           |           |
|---|-----------|-----------|-----------|
| C | 10.084663 | 8.627032  | 20.433029 |
| H | 9.923878  | 9.066425  | 21.412772 |
| C | 10.494254 | 9.430930  | 19.374794 |
| H | 10.636784 | 10.496313 | 19.537691 |
| C | 10.079207 | 11.256421 | 16.516141 |
| C | 10.426773 | 12.337547 | 15.692874 |
| H | 11.396143 | 12.366793 | 15.200852 |
| C | 9.524279  | 13.373821 | 15.483205 |
| H | 9.801613  | 14.210203 | 14.848962 |
| C | 8.264317  | 13.333888 | 16.079733 |
| H | 7.559547  | 14.142625 | 15.912228 |
| C | 7.907887  | 12.253950 | 16.882271 |
| H | 6.924434  | 12.215861 | 17.340677 |
| C | 8.809241  | 11.214742 | 17.101288 |
| H | 8.521875  | 10.375750 | 17.726799 |
| C | 11.449250 | 6.094900  | 12.692434 |
| H | 10.997732 | 5.974080  | 11.701779 |
| H | 12.251300 | 5.355428  | 12.777731 |
| C | 10.428129 | 5.866181  | 13.794560 |
| H | 10.060243 | 4.834673  | 13.700652 |
| H | 10.932439 | 5.939324  | 14.766751 |
| C | 9.220645  | 6.789730  | 13.789594 |
| H | 8.540782  | 6.505409  | 14.598809 |
| H | 8.661289  | 6.703665  | 12.851736 |
| C | 9.596978  | 10.749095 | 12.113318 |
| C | 9.783017  | 8.298277  | 10.965896 |
| C | 11.857184 | 10.047769 | 10.999224 |
| C | 13.994979 | 9.718385  | 17.170324 |
| H | 13.867204 | 8.849428  | 17.826507 |
| H | 14.959725 | 10.169572 | 17.425414 |
| C | 12.835303 | 10.694635 | 17.348523 |
| H | 12.992309 | 11.611712 | 16.770418 |
| H | 12.714522 | 10.983079 | 18.397900 |

---
